# Supplementary material for: Selection and Comparative Gene Expression of Midgut-Specific Targets for Drosophila suzukii
Source: MDPI journal article supplement (doi:10.3390/insects14010076), 2023-01-12
Supplement: s1 [file s1]

**Table S1.** Raw data of the midgut and whole-body transcriptome results.

| Sample     | Total read base | Total reads | GC (%) | Q (20) | Q (30) |
|------------|-----------------|-------------|--------|--------|--------|
| Midgut     | 5,497,308,800   | 54,428,800  | 52.49  | 98.13  | 96.79  |
| Whole-body | 6,040,056,944   | 59,802,544  | 52.57  | 98.11  | 96.78  |

Total read bases: Total reads x Read length; Total reads: Total number of reads; GC(%): GC content; Q20 (%): Ratio of reads that have phred quality score over 20; Q30 (%): Ratio of reads that have phred quality score over 30.

**Table S2.** Mapped data stats. # of processed reads: # of cleaned reads after trimming. Number of mapped reads: # of reads mapped to reference. # of suppressed reads by multiple mapping: Number of reads removed due to multiple mapping. overall read mapping ratio: Number of total mapped reads / # of total processed reads.

| Sample     | Read type | # of processed reads | # of mapped reads  | # of suppressed reads by multiple mapping | Overall read mapping ratio |
|------------|-----------|----------------------|--------------------|-------------------------------------------|----------------------------|
| Midgut     | 1         | 27,105,105           | 21,403,526 (79.0%) | 1,507,409 (7.0%)                          | 78.9%                      |
| Midgut     | 2         | 27,105,105           | 21,363,944 (78.8%) | 1,505,599 (7.0%)                          |                            |
| Whole-body | 1         | 29,777,714           | 23,486,620 (78.9%) | 1,601,068 (6.8%)                          | 78.8%                      |
| Whole-body | 2         | 29,777,714           | 23,429,654 (78.7%) | 1,593,793 (6.8%)                          |                            |

**Table S3.** The most upregulated genes in the midgut of *Drosophila suzukii* are found in *Drosophila melanogaster*.

| Search Gene | Found FBGN  | Found Gene | imaginal disc, larvae L3 | central nervous system, larvae L3 | head, virgin 1-day female | salivary gland, larvae L3 | digestive system, larvae L3 | digestive system, 1-day adult | digestive system, 4-day adult | digestive system, 20-day adult | fat body, larvae L3 | carcass, larvae L3 | ovary, mated 4-day female | testis, mated 4-day male |
|-------------|-------------|------------|--------------------------|-----------------------------------|---------------------------|---------------------------|-----------------------------|-------------------------------|-------------------------------|--------------------------------|---------------------|--------------------|---------------------------|--------------------------|
| CG3934      | FBgn0037783 | Npc2c      | 19                       | 0                                 | 0                         | 2                         | 155                         | 25                            | 8                             | 10                             | 0                   | 1                  | 0                         | 0                        |
| CG7170      | FBgn0035887 | Jon66Cii   | 302                      | 0                                 | 0                         | 43                        | 1430                        | 5                             | 2                             | 11                             | 1                   | 5                  | 0                         | 0                        |
| CG18548     | FBgn0042206 | GstD10     | 6                        | 0                                 | 1                         | 1                         | 14                          | 54                            | 33                            | 20                             | 68                  | 1                  | 0                         | 7                        |
| CG5246      | FBgn0038484 | CG5246     | 9                        | 0                                 | 0                         | 1                         | 42                          | 66                            | 38                            | 38                             | 1                   | 0                  | 0                         | 2                        |
| CG14746     | FBgn0043576 | CG14743    | 81                       | 0                                 | 0                         | 2                         | 147                         | 302                           | 227                           | 200                            | 12                  | 1                  | 0                         | 3                        |
| CG7118      | FBgn0035886 | Jon66Ci    | 1519                     | 0                                 | 0                         | 318                       | 8900                        | 43                            | 27                            | 116                            | 2                   | 32                 | 0                         | 0                        |
| CG12092     | FBgn0261675 | Npc1b      | 1                        | 0                                 | 0                         | 0                         | 18                          | 41                            | 36                            | 43                             | 0                   | 0                  | 0                         | 0                        |
| CG8221      | FBgn0020506 | Amyrel     | 28                       | 0                                 | 0                         | 1                         | 36                          | 6                             | 2                             | 4                              | 0                   | 0                  | 0                         | 0                        |
| CG8695      | FBgn0002571 | Mal-A3     | 26                       | 0                                 | 0                         | 0                         | 20                          | 200                           | 88                            | 112                            | 0                   | 0                  | 0                         | 14                       |
| CG7381      | FBgn0038098 | CG7381     | 3                        | 1                                 | 4                         | 0                         | 46                          | 74                            | 71                            | 80                             | 0                   | 1                  | 21                        | 1                        |
| CG30502     | FBgn0050502 | fa2h       | 1                        | 0                                 | 0                         | 0                         | 11                          | 34                            | 34                            | 37                             | 0                   | 0                  | 0                         | 0                        |
| CG14820     | FBgn0035718 | CG14820    | 1                        | 0                                 | 0                         | 0                         | 8                           | 64                            | 45                            | 32                             | 0                   | 0                  | 0                         | 1                        |
| CG33346     | FBgn0053346 | CG33346    | 25                       | 2                                 | 0                         | 11                        | 833                         | 341                           | 175                           | 216                            | 1                   | 5                  | 0                         | 2                        |
| CG10827     | FBgn0038845 | CG10827    | 24                       | 0                                 | 0                         | 1                         | 84                          | 233                           | 131                           | 166                            | 0                   | 0                  | 0                         | 10                       |
| CG40305     | FBgn0044872 | FucTC      | 0                        | 0                                 | 0                         | 0                         | 1                           | 3                             | 2                             | 2                              | 0                   | 0                  | 0                         | 0                        |
| CG9903      | FBgn0030756 | CG9903     | 9                        | 0                                 | 0                         | 6                         | 241                         | 22                            | 12                            | 12                             | 0                   | 1                  | 0                         | 1                        |
| CG15818     | FBgn0031910 | CG15818    | 59                       | 10                                | 0                         | 26                        | 2001                        | 53                            | 47                            | 60                             | 0                   | 15                 | 0                         | 0                        |
| CG8907      | FBgn0038466 | CG8907     | 5                        | 0                                 | 0                         | 1                         | 35                          | 69                            | 55                            | 79                             | 1                   | 0                  | 0                         | 1                        |
| CG6417      | FBgn0032435 | Oatp33Eb   | 6                        | 0                                 | 0                         | 1                         | 57                          | 55                            | 46                            | 69                             | 0                   | 0                  | 0                         | 2                        |

**Table S4.** List of the primers used in this study

| Gene Name  | DS Number     | Forward (5' - 3')      | Reverse (5' - 3')       |
|------------|---------------|------------------------|-------------------------|
| DH31-R     | DS10_00006592 | GGATTCGACCCAGCAAGATT   | TTACGCAGGTGGTGTAGTTG    |
| Toll-9     | DS10_00007171 | GCTCTTCATGTCGGGCAATA   | GTAGGTCAGGAAGTTGGTGAAG  |
| snakeskin  | DS10_00008095 | ACGTGGTTGGCTGCATTA     | CTCCGAGTTCACATAGAGGAATC |
| methuselah | DS10_00013361 | GTTCCCGAATGGTTCGTATCT  | CTTATGTGGCTCTCCACCTTT   |
| NPF-R      | DS10_00008044 | GTGAGTCAGGCCACTCTTT    | GACATGCTCTGGGAGTTCTT    |
| Gr43a      | DS10_00005654 | AGACCATGTACCGCATCAAG   | TTCTCGTAGCCCAGGAAGTA    |
| Adsn1-R    | DS10_00012673 | CGGAGGAATCCACTGAAACTAA | CTGATCGTGGTTGCTGACTAT   |
| Adsn2-R    | DS10_00012139 | GCCGCCGATGTCTTTAGTAT   | TCCGTGGTCATGACTTTCTG    |
| Rpn2       | Reference 1   | TCAGCGGCAACTTCTCCTTT   | CGCGAGATATTCAGCTCCTCA   |
| Rpt6       | Reference 2   | AGAAGGTGCTGGTCAAGGTG   | TAGCTCTCATTTGCAGGGC     |
