# Supplementary material for: Selection and Comparative Gene Expression of Midgut-Specific Targets for Drosophila suzukii
Source: Insects. 2023 Jan 12;14(1):76. doi: 10.3390/insects14010076 (PMC9864236; doi:10.3390/insects14010076)
Supplement: Supplementary file 1 [file insects-14-00076-s001.zip › Supplementary S1_R1.xlsx]

## Sheet: Upregulated genes in Midgut
DS Number	FBgn Number	CG Number	Symbol	Description	InterPro	FC_Midgut/Wholebody	FPKM_Midgut	FPKM_Wholebody	GenBank Accession No.
DS10_00007742	FBgn0037783	CG3934	Npc2c	Molecular function: sterol binding. Biological process: neurogenesis.	Niemann-Pick type C-2c, Immunoglobulin E-set	60.3205	107.574	3.29379	XP_002104026.1
DS10_00003732	FBgn0035887	CG7170	Jon66Cii	Molecular function: serine-type endopeptidase activity. Biological process: proteolysis.	Jonah 66Cii, Serine proteases, trypsin domain	58.118	351.923	8.32759	XP_002093465.1
DS10_00013337	FBgn0042206	CG18548	GstD10	Molecular function: glutathione transferase activity. Biological process: glutathione metabolic process.	Glutathione S-transferase	53.2337	101.441	3.6251	XP_002097362.1
DS10_00008253	FBgn0038484	CG5246	n/a	Molecular function: serine-type endopeptidase activity. Biological process: proteolysis.	Serine proteases	51.6428	90.6628	3.33973	XP_002103096.1
DS10_00006791	FBgn0033326	CG14743	n/a	Molecular function is unknown. Biological process: transmembrane transport.	Sodium/calcium exchanger membrane region	47.9662	88.4687	3.57075	XP_002089675.1
DS10_00003731	FBgn0035886	CG7118	Jon66Ci	Molecular function: serine-type endopeptidase activity. Biological process: proteolysis.	Jonah 66Ci, Serine proteases, trypsin domain	47.8463	877.02	19.5679	XP_002093466.1
DS10_00004849	FBgn0261675	CG12092	Npc1b	Molecular function: hedgehog receptor activity. Biological process: central nervous system development; dorsal closure; intestinal cholesterol absorption; peripheral nervous system development.	Niemann-Pick type C-1b, Niemann-Pick C1, N-terminal	46.2292	128.664	5.38493	NP_608417.2
DS10_00003293	FBgn0020506	CG8221	Amyrel	Molecular function: oligo-1,6-glucosidase activity; alpha-amylase activity. Biological process: carbohydrate metabolic process.	Glycoside hydrolase superfamily	45.2481	114.081	4.97153	AAO14606.1
DS10_00006758	FBgn0002571	CG8695	Mal-A3	Molecular function: alpha-glucosidase activity. Biological process: glucose metabolic process.	Maltase A3, Glycoside hydrolase superfamily	42.655	77.6311	3.65873	NP_476628.2
DS10_00011678	FBgn0038098	CG7381	n/a	Molecular function is unknown. Biological process is unknown.	EB domain	42.6034	72.4071	3.45517	XP_002103639.1
DS10_00011960	FBgn0038098	CG7381	n/a	Molecular function is unknown. Biological process is unknown.	EB domain	41.1778	83.6848	4.10647	NP_731754.1
DS10_00005664	FBgn0050502	CG30502	fa2h	Molecular function: fatty acid in-chain hydroxylase activity. Biological process: oxidation-reduction process; sphingolipid metabolic process; fatty acid biosynthetic process.	fatty acid 2-hydroylase, Cytochrome b5, heme-binding site	40.8684	81.6452	4.05342	XP_002080426.1
DS10_00004219	FBgn0035718	CG14820	n/a	Molecular function: protein binding. Biological process: proteolysis.	Carboxypeptidase	40.4153	114.216	5.60755	XP_002035625.1
DS10_00009869	FBgn0053346	CG33346	n/a	Molecular function: metal ion binding; hydrolase activity; nucleic acid binding. Biological process is unknown.	DNA/RNA non-specific endonuclease	39.5912	45.0265	1.86086	NP_651627.1
DS10_00009032	FBgn0038845	CG10827	n/a	Molecular function: alkaline phosphatase activity. Biological process: metabolic process.	Alkaline phosphatase	39.5177	69.7598	3.64701	NP_650931.1
DS10_00007511	FBgn0044872	CG40305	FucTC	Molecular function: fucosyltransferase activity. Biological process: protein glycosylation.	alpha1,3-fucosyltransferase C, Fucosyltransferase, N-terminal	38.4008	128.71	6.28384	XP_001978752.1
DS10_00008224	FBgn0030756	CG9903	n/a	Molecular function is unknown. Biological process is unknown.	Bile acid:sodium symporter	37.171	53.3105	2.93479	AAV36922.1
DS10_00001509	FBgn0031910	CG15818	n/a	Molecular function: carbohydrate binding. Biological process is unknown.	C-type lectin fold	36.8579	231.577	9.14566	XP_001970154.1
DS10_00009647	FBgn0038466	CG8907	n/a	Molecular function is unknown. Biological process is unknown.	SAM domain	35.7077	95.417	5.48968	XP_002103124.1
DS10_00008442	FBgn0032435	CG6417	Oatp33Eb	Molecular function: sodium-independent organic anion transmembrane transporter activity; organic anion transmembrane transporter activity. Biological process: organic anion transport.	Organic anion transporting polypeptide 33Eb, Kazal domain	35.4894	65.3217	3.93506	NP_609570.1
DS10_00004649	FBgn0040342	CG3706	n/a	Molecular function is unknown. Biological process is unknown.		35.4346	159.866	7.68105	XP_001982446.1
DS10_00008255	FBgn0038484	CG5246	n/a	Molecular function: serine-type endopeptidase activity. Biological process: proteolysis.	Serine proteases	35.0268	29.8003	0.957527	XP_002097994.1
DS10_00000214	FBgn0028853	CG15263	n/a	Molecular function is unknown. Biological process is unknown.		34.9357	519.356	16.7075	XP_001968956.1
DS10_00007689	FBgn0026755	CG9481	Ugt37b1	Molecular function: glucuronosyltransferase activity. Biological process: metabolic process.	UDP-glucuronosyl/UDP-glucosyltransferase	34.68	38.1018	1.86747	XP_002038072.1
DS10_00008254	FBgn0051267	CG31267	n/a	Molecular function: serine-type endopeptidase activity. Biological process: proteolysis.	Serine proteases	34.538	99.3296	5.78279	NP_732214.1
DS10_00012084	FBgn0038701	CG18493	n/a	Molecular function: serine-type peptidase activity. Biological process: proteolysis.	Alpha/Beta hydrolase fold	34.3918	50.7353	3.14934	XP_002096311.1
DS10_00012560	FBgn0037750	CG12946	Whamy	Molecular function: GTPase binding. Biological process: microtubule bundle formation.	WHAMM and JMY related, WH2 domain	34.3181	41.014	2.21506	NP_001036699.1
DS10_00005532	FBgn0034031	CG12963	n/a	Molecular function is unknown. Biological process is unknown.		34.3135	82.2979	4.97437	NP_001246341.1
DS10_00013390	FBgn0053265	CG33265	Muc68E	Molecular function: extracellular matrix structural constituent. Biological process: chitin metabolic process.	Mucin 68E, Chitin binding domain	34.2021	49.5417	3.0749	NP_996064.1
DS10_00006759	FBgn0002571	CG8695	Mal-A3	Molecular function: alpha-glucosidase activity. Biological process: glucose metabolic process.	Glycoside hydrolase superfamily	34.0636	95.9851	5.7357	NP_476628.2
DS10_00010572	FBgn0038638	CG7702	n/a	Molecular function is unknown. Biological process is unknown.	Leucine-rich repeat	34.0631	46.8135	2.87435	XP_001979618.1
DS10_00003925	FBgn0036066	CG14160	n/a	Molecular function: transmembrane transporter activity. Biological process: transmembrane transport.	Major facilitator, sugar transporter-like	33.5723	111.06	6.37997	XP_002029978.1
DS10_00013341	FBgn0042103	CG18746	n/a	Molecular function is unknown. Biological process is unknown.	Arrestin	33.0789	74.0303	4.82262	XP_002102514.1
DS10_00010326	FBgn0038416	CG17930	n/a	Molecular function: transmembrane transporter activity. Biological process: transmembrane transport.	Major facilitator, sugar transporter-like	32.9297	28.8587	1.11346	XP_002103200.1
DS10_00010429	FBgn0036738	CG7542	n/a	Molecular function: serine-type endopeptidase activity. Biological process: proteolysis.	Serine proteases	32.4061	282.151	11.4156	XP_002094991.1
DS10_00008013	FBgn0030929	CG15043	n/a	Molecular function is unknown. Biological process is unknown.	Transcription activator MBF2	32.4014	1205.85	38.7601	XP_002039289.1
DS10_00003364	FBgn0033423	CG1809	n/a	Molecular function: alkaline phosphatase activity. Biological process: metabolic process.	Alkaline phosphatase	32.166	181.816	8.95852	XP_001969186.1
DS10_00008440	FBgn0032433	CG5427	Oatp33Ea	Molecular function: organic anion transmembrane transporter activity; transporter activity. Biological process: organic anion transport.	Kazal domain	32.1501	136.497	7.47764	XP_002088477.1
DS10_00008514	FBgn0003358	CG31039	Jon99Ci	Molecular function: serine-type endopeptidase activity. Biological process: digestion; proteolysis.	Serine proteases	32.0161	44.9504	3.0397	XP_002086713.1
DS10_00010325	FBgn0038416	CG17930	n/a	Molecular function: transmembrane transporter activity. Biological process: transmembrane transport.	Major facilitator, sugar transporter-like	31.8627	31.0346	1.52556	NP_650533.1
DS10_00000921	FBgn0028518	CG18480	n/a	Molecular function is unknown. Biological process is unknown.	Leucine-rich repeat	31.4974	56.1139	3.92734	NP_609761.1
DS10_00008204	FBgn0029824	CG3726	n/a	Molecular function: DNA binding. Biological process is unknown.	BTB/POZ domain	31.3713	172.688	8.88163	XP_001977037.1
DS10_00005629	FBgn0033139	CG12837	Tsp42Er	Molecular function is unknown. Biological process is unknown.	Tetraspanin	31.2713	92.3273	5.93839	XP_002080383.1
DS10_00006137	FBgn0032069	CG9468	LManVI	Molecular function: alpha-mannosidase activity. Biological process: mannose metabolic process.	Glycosyl hydrolase family 38	31.0763	146.188	8.07503	XP_001969237.1
DS10_00011344	FBgn0051414 + FBgn0051413	CG31414 + CG31413	Gba1b + Qsox4	BlastP against D. melanogaster AA	Glucocerebrosidase 1b, Glycoside hydrolase family 30; Quiescin sulfhydryl oxidase 4, sulfhydryl oxidase	30.6512	67.7731	4.85357	XP_002032378.1
DS10_00010797	FBgn0038701	CG18493	n/a	Molecular function: serine-type peptidase activity. Biological process: proteolysis.	Alpha/Beta hydrolase fold	30.4162	899.832	30.1535	AAY55321.1
DS10_00004920	FBgn0030148	CG3106	n/a	Molecular function: transferase activity, transferring acyl groups other than amino-acyl groups. Biological process is unknown.	Acyltransferase 3	30.2665	252.514	11.1424	XP_001977305.1
DS10_00011697	FBgn0053337	CG33337	n/a	Molecular function: transferase activity, transferring acyl groups. Biological process is unknown.	Acyltransferase 3	30.2251	27.1197	1.31867	NP_651158.1
DS10_00007570	FBgn0042179	CG18869	Ugt305A1	Molecular function: transferase activity, transferring hexosyl groups. Biological process: metabolic process.	UDP-glucuronosyl/UDP-glucosyltransferase	30.1422	27.5237	1.39204	NP_652703.1
DS10_00011830	FBgn0038638	CG7702	n/a	Molecular function is unknown. Biological process is unknown.	Leucine-rich repeat	30.0694	33.3309	2.04725	XP_001979618.1
DS10_00003609	FBgn0050424	CG30424	n/a	Molecular function is unknown. Biological process is unknown.	Mab-21 domain	29.9611	102.413	6.58334	XP_002092925.1
DS10_00007312	FBgn0030747	CG4301	n/a	Molecular function: calcium-transporting ATPase activity. Biological process: cation transport; phospholipid transport.	P-type ATPase	29.7579	43.8518	3.30786	XP_002100809.1
DS10_00004565	FBgn0040099	CG7106	lectin-28C	Molecular function: galactose binding; carbohydrate binding. Biological process is unknown.	C-type lectin fold	29.1315	44.5435	3.46534	XP_001974444.1
DS10_00000917	FBgn0028948	CG15253	n/a	Molecular function: metalloendopeptidase activity. Biological process: proteolysis.	Astacin-like metallopeptidase domain	28.9947	315.472	13.4445	XP_002079561.1
DS10_00010308	FBgn0037679	CG8866	Aduk	Molecular function: protein serine/threonine kinase activity. Biological process: protein phosphorylation.	Protein kinase-like domain superfamily	28.981	53.0642	4.16787	XP_002096922.1
DS10_00003035	FBgn0035040	CG4741	n/a	Molecular function is unknown. Biological process is unknown.	n/a	28.6273	124.4	7.68715	XP_002092864.1
DS10_00001586	FBgn0032124	CG17855	n/a	Molecular function is unknown. Biological process is unknown.	n/a	28.5649	28.6896	1.80664	XP_002078779.1
DS10_00000376	FBgn0051901	CG31901	Mur29B	Molecular function: extracellular matrix structural constituent. Biological process is unknown.	n/a	28.5203	128.827	7.92987	XP_002078634.1
DS10_00001550	FBgn0032088	CG13102	n/a	Molecular function is unknown. Biological process is unknown.	n/a	28.4683	885.649	31.1447	NP_609267.1
DS10_00000915	FBgn0028950	CG15255	n/a	Molecular function: metalloendopeptidase activity. Biological process: neurogenesis.	Astacin-like metallopeptidase domain	28.4605	244.982	11.5451	XP_002035920.1
DS10_00006634	FBgn0033775	CG17577	Cyp9h1	Molecular function: electron carrier activity. Biological process: oxidation-reduction process.	Cytochrome P450 superfamily	28.4445	29.4785	1.91709	XP_002033618.1
DS10_00001105	FBgn0050280	CG30280	n/a	Molecular function is unknown. Biological process is unknown.	Fibrinogen, alpha/beta/gamma chain, C-terminal globular domain	28.3691	641.174	22.6855	XP_001967325.1
DS10_00003041	FBgn0035043	CG4781	n/a	Molecular function is unknown. Biological process is unknown.	Leucine-rich repeat	28.2575	145.927	8.62426	NP_611951.1
DS10_00011833	FBgn0040091	CG4414	Ugt58Fa	Molecular function: glucuronosyltransferase activity. Biological process: metabolic process.	UDP-glucuronosyl/UDP-glucosyltransferase	28.0668	35.0107	2.65447	NP_650228.1
DS10_00010453	FBgn0028381	CG14902	Decay	Molecular function: cysteine-type endopeptidase activity. Biological process: apoptotic process.	Caspase-like domain superfamily	27.9614	103.8	7.05865	XP_002097300.1
DS10_00010566	FBgn0039941, FBgn0040031	CG17167, CG12061	n/a	Molecular function: calcium, potassium:sodium antiporter activity. Biological process: transmembrane transport.	Sodium/calcium exchanger membrane region	27.9177	47.3115	3.88951	XP_002086009.1
DS10_00003038	FBgn0015040	CG3616	Cyp9c1	Molecular function: electron carrier activity. Biological process: oxidation-reduction process.	Cytochrome P450 superfamily	27.9159	29.7024	2.04021	XP_002043103.1
DS10_00002999	FBgn0035006	CG4563	n/a	Molecular function: 4-coumarate-CoA ligase activity. Biological process: metabolic process.	AMP-binding enzyme, C-terminal domain	27.4409	28.9225	2.02985	NP_611913.1
DS10_00006793	FBgn0033327	CG8577	PGRP-SC1b	Molecular function: N-acetylmuramoyl-L-alanine amidase activity; peptidoglycan binding. Biological process: peptidoglycan catabolic process; innate immune response.	N-acetylmuramoyl-L-alanine amidase/PGRP domain superfamily	27.3732	942.289	35.2462	XP_002080643.1
DS10_00000539	FBgn0031514	CG3332	OtopLb	Molecular function is unknown. Biological process is unknown.	Otopetrin	26.7171	43.962	3.83368	XP_001968537.1
DS10_00000119	FBgn0031580	CG15423	n/a	Molecular function is unknown. Biological process is unknown.	n/a	26.6147	1717.22	63.3995	XP_001968636.1
DS10_00001151	FBgn0002939	CG31783	ninaD	Molecular function: scavenger receptor activity. Biological process: carotenoid transport; phototransduction; rhodopsin biosynthetic process; phototransduction, UV; phototransduction, visible light.	CD36 family	26.327	73.9624	5.97553	XP_002079764.1
DS10_00009450	FBgn0039761	CG18404	n/a	Molecular function is unknown. Biological process: neurogenesis.	n/a	26.0629	3851.79	148.453	XP_002105494.1
DS10_00011755	FBgn0038740	CG4562	n/a	Molecular function: ATPase activity, coupled to transmembrane movement of substances; transporter activity. Biological process: transmembrane transport.	ABC transporter type 1	25.9282	87.8942	6.70413	NP_001262747.1
DS10_00008343	FBgn0037935	CG6834	n/a	Molecular function: protein binding. Biological process is unknown.	CHK kinase-like	25.926	57.3168	5.0152	XP_002099052.1
DS10_00007858	FBgn0035431	CG14968	n/a	Molecular function is unknown. Biological process is unknown.	PH-like domain superfamily	25.8671	86.6053	6.64259	XP_001971732.1
DS10_00002976	FBgn0050411	CG30411	n/a	Molecular function is unknown. Biological process is unknown.	Transcription activator MBF2	25.758	53.6231	4.82875	XP_001976402.1
DS10_00001234	FBgn0032733	CG15170	n/a	Molecular function is unknown. Biological process: wound healing.	Domain of unknown function DUF753	25.7477	332.528	15.5462	XP_002039045.1
DS10_00008151	FBgn0262580	CG43120	n/a	Molecular function is unknown. Biological process is unknown.	BTB/POZ domain	25.597	35.2179	3.21986	NP_001246754.1
DS10_00012673	FBgn0039818	CG11318	n/a	Molecular function: G-protein coupled receptor activity. Biological process: G-protein coupled receptor signaling pathway.	GPCR, family 2, secretin-like	25.5359	21.0358	1.13785	NP_651842.3
DS10_00006591	FBgn0033826	CG4734	n/a	Molecular function is unknown. Biological process is unknown.	Spermadhesin, CUB domain superfamily	25.5136	1243.22	49.3246	NP_610864.1
DS10_00004153	FBgn0035670	CG10472	n/a	BlastP against D. melanogaster AA	Peptidase S1, PA clan	25.3632	2001.94	80.9523	XP_002093874.1
DS10_00001683	FBgn0026760	CG7121	Tehao	Molecular function: transmembrane signaling receptor activity. Biological process: inter-male aggressive behavior.	BspA type Leucine rich repeat region	25.121	23.3154	1.65077	XP_002088602.1
DS10_00009542	FBgn0039774	CG1471	Cdase	Molecular function: ceramidase activity. Biological process: synaptic transmission; sphingolipid metabolic process; photoreceptor cell maintenance; ceramide catabolic process; synaptic vesicle fusion to presynaptic membrane; hatching behavior; synaptic vesicle exocytosis.	Neutral/alkaline nonlysosomal ceramidase	24.998	76.4337	6.30193	NP_651797.1
DS10_00007255	FBgn0035780	CG18417	n/a	Molecular function: zinc ion binding; metallocarboxypeptidase activity. Biological process: proteolysis.	Carboxypeptidase, activation peptide	24.9634	323.261	15.679	XP_002083984.1
DS10_00006190	FBgn0030776	CG4653	n/a	Molecular function: serine-type endopeptidase activity. Biological process: proteolysis.	Serine proteases, trypsin domain	24.7677	986.727	40.5514	XP_002101405.1
DS10_00012747	FBgn0038701	CG18493	n/a	Molecular function: serine-type peptidase activity. Biological process: proteolysis.	Alpha/Beta hydrolase fold	24.6452	726.845	28.2835	AAY55321.1
DS10_00010007	FBgn0038292	CG3987	n/a	Molecular function is unknown. Biological process: mesoderm development.	n/a	24.598	19.792	1.12252	XP_002097799.1
DS10_00001726	FBgn0028533	CG7953	n/a	Molecular function is unknown. Biological process is unknown.	Haemolymph juvenile hormone binding	24.4614	3358.01	143.065	XP_002088656.1
DS10_00005248	FBgn0023541	CG3540	Cyp4d14	Molecular function: electron carrier activity. Biological process: oxidation-reduction process.	Cytochrome P450 superfamily	24.3532	86.7227	6.98468	XP_001982610.1
DS10_00001725	FBgn0028534	CG7916	n/a	Molecular function is unknown. Biological process is unknown.	Haemolymph juvenile hormone binding	24.2823	2894.25	125.41	XP_002088655.1
DS10_00004582	FBgn0035154	CG3344	hiro	Molecular function: serine-type carboxypeptidase activity. Biological process: proteolysis.	Alpha/Beta hydrolase fold	24.2554	430.885	19.4387	XP_002083130.1
DS10_00009985	FBgn0085345	CG34316	n/a	Molecular function is unknown. Biological process is unknown.	Haemolymph juvenile hormone binding	24.2019	42.2566	4.1745	ABN49395.1
DS10_00010324	FBgn0038416	CG17930	n/a	Molecular function: transmembrane transporter activity. Biological process: transmembrane transport.	Major facilitator, sugar transporter-like	24.1916	18.1598	0.892733	XP_002103200.1
DS10_00003122	FBgn0034296	CG10912	n/a	Molecular function is unknown. Biological process: cold acclimation.	Protein TsetseEP	24.1079	2146.83	91.9856	CBA35170.1
DS10_00009537	FBgn0039769	CG15534	n/a	Molecular function: sphingomyelin phosphodiesterase activity. Biological process: sphingomyelin metabolic process	Acid sphingomyelinase/endopolyphosphatase,	24.0917	149.376	9.9006	XP_002105504.1
DS10_00004760	FBgn0031034	CG14205	n/a	Molecular function: transferase activity, transferring acyl groups other than amino-acyl groups. Biological process is unknown.	Acyltransferase 3	24.0703	13.3472	0.106873	XP_002101014.1
DS10_00011980	FBgn0037935	CG6834	n/a	Molecular function: protein binding. Biological process is unknown.	CHK kinase-like	23.988	28.0549	2.68594	XP_002031585.1
DS10_00000112	FBgn0036766	CG5506	n/a	Molecular function is unknown. Biological process is unknown.	DM9 repeat	23.9569	1476.7	60.8732	XP_001353960.1
DS10_00004424	FBgn0035300	CG1139	n/a	Molecular function: amino acid transmembrane transporter activity. Biological process: growth.	Amino acid transporter, transmembrane domain	23.6014	175.482	11.0706	XP_002035018.1
DS10_00010592	FBgn0039006	CG12800	Cyp6d4	Molecular function: electron carrier activity. Biological process: chaeta development; wing disc development.	Cytochrome P450 superfamily	23.5973	66.0239	6.07888	XP_002098331.1
DS10_00007256	FBgn0035781	CG8560	n/a	Molecular function: zinc ion binding; metallocarboxypeptidase activity. Biological process: proteolysis.	Carboxypeptidase, activation peptide	23.518	700.397	28.6643	NP_648120.3
DS10_00004787	FBgn0031004	CG7992	n/a	Molecular function is unknown. Biological process is unknown.	n/a	23.4908	184.731	11.5837	XP_001977757.1
DS10_00004184	FBgn0261631	CG42714	n/a	Molecular function is unknown. Biological process is unknown.	n/a	23.338	202.741	12.2057	NP_001189053.1
DS10_00001970	FBgn0032387	CG16965	n/a	Molecular function: alpha,alpha-trehalase activity. Biological process: carbohydrate metabolic process.	Glycoside hydrolase, family 65, central catalytic	23.2587	156.52	10.4784	NP_609528.3
DS10_00000594	FBgn0030163	CG1791	n/a	BlastP against D. melanogaster AA	Fibrinogen, alpha/beta/gamma chain, C-terminal globular domain	23.2119	19.6536	1.36817	XP_001995279.1
DS10_00002393	FBgn0085261	CG34232	n/a	Molecular function is unknown. Biological process is unknown.	n/a	23.2023	167.529	10.9552	XP_002091121.1
DS10_00001527	FBgn0031929	CG18585	n/a	Molecular function: zinc ion binding; metallocarboxypeptidase activity. Biological process: proteolysis.	Carboxypeptidase, activation peptide	23.1235	452.488	20.9501	AAV36866.1
DS10_00001742	FBgn0259998	CG17571	n/a	BlastP against D. melanogaster AA	Peptidase S1, PA clan	22.9456	1401.58	60.2337	XP_004517889.2
DS10_00000439	FBgn0032187	CG4839	n/a	Molecular function: cGMP-dependent protein kinase activity. Biological process: protein phosphorylation.	Protein kinase-like domain superfamily	22.9328	26.7018	2.73125	XP_002036436.1
DS10_00003776	FBgn0035926	CG5804	Acbp5	Molecular function: diazepam binding; enzyme inhibitor activity; fatty-acyl-CoA binding. Biological process: cellular acyl-CoA homeostasis.	Acyl-CoA-binding protein, ACBP	22.9174	6288.19	228.143	XP_001956876.1
DS10_00006189	FBgn0030777 + FBgn0030775 + FBgn0030774	CG9672 + CG9673 + CG9675	sphe	BlastP against D. melanogaster AA	spheroide, Peptidase S1, PA clan	22.8946	1172.98	51.1476	NP_573149.1
DS10_00013541	FBgn0035779	CG8562	n/a	Molecular function: metallocarboxypeptidase activity. Biological process: proteolysis.	Carboxypeptidase, activation peptide	22.8692	1871.52	79.9647	XP_002094042.1
DS10_00002387	FBgn0033978	CG10242	Cyp6a23	Molecular function: electron carrier activity. Biological process: oxidation-reduction process.	Cytochrome P450 superfamily	22.847	97.3976	7.89189	XP_002081565.1
DS10_00004798	FBgn0030993	CG7635	Mec2	Molecular function: protein binding. Biological process is unknown.	Band 7/SPFH domain superfamily	22.8346	116.323	8.79814	XP_002107374.1
DS10_00007220	FBgn0035743	CG15829	Acbp6	Molecular function: diazepam binding; enzyme inhibitor activity; fatty-acyl-CoA binding. Biological process: cellular acyl-CoA homeostasis.	Acyl-CoA-binding protein, ACBP	22.7743	121.734	9.09097	NP_648082.1
DS10_00011867	FBgn0037935	CG6834	n/a	Molecular function: protein binding. Biological process is unknown.	CHK kinase-like	22.7254	77.9265	6.89748	XP_002097965.1
DS10_00006389	FBgn0065032	CG8936	Arpc3B	Molecular function: structural constituent of cytoskeleton; actin binding. Biological process: Arp2/3 complex-mediated actin nucleation.	Actin-related protein 2/3 complex subunit 3	22.677	43.2857	4.61493	XP_002107196.1
DS10_00007291	FBgn0030347	CG15739	n/a	Molecular function: 4-nitrophenylphosphatase activity. Biological process: metabolic process.	HAD-like superfamily	22.64	43.8543	4.68085	XP_001977064.1
DS10_00011019	FBgn0039087	CG10168	Ugt303B2	Molecular function: 2-hydroxyacylsphingosine 1-beta-galactosyltransferase activity. Biological process: metabolic process.	UDP-glucuronosyl/UDP-glucosyltransferase	22.6353	17.098	0.970701	XP_001982129.1
DS10_00006913	FBgn0259101	CG42249	n/a	Molecular function: nucleoside-triphosphatase activity; nucleoside-diphosphatase activity. Biological process: nucleotide catabolic process.	5'-Nucleotidase/apyrase	22.6039	16.1566	0.801975	NP_572683.1
DS10_00001340	FBgn0010019	CG3972	Cyp4g1	Molecular function: electron carrier activity. Biological process: lipid metabolic process.	Cytochrome P450 superfamily	22.4972	85.9255	7.35187	NP_608457.1
DS10_00001724	FBgn0028920	CG8997	n/a	Molecular function is unknown. Biological process is unknown.	Haemolymph juvenile hormone binding	22.4864	4240.36	185.698	XP_002088654.1
DS10_00000967	FBgn0032850	CG10723	Kua	Molecular function: fatty acid alpha-hydroxylase activity. Biological process is unknown.	B domain of TMEM189, localisation domain	22.3609	73.1139	6.76748	XP_001974176.1
DS10_00002065	FBgn0034436	CG11961	n/a	Molecular function: peptidase activity. Biological process: proteolysis.	Peptidase M28	22.1252	63.6839	6.27175	NP_611413.2
DS10_00003120	FBgn0034294	CG5765	Muc55B	Molecular function: extracellular matrix structural constituent. Biological process is unknown.	Protein TsetseEP	22.0854	789.924	34.5946	AAL89901.1
DS10_00009543	FBgn0260440	CG31020	spdo	Molecular function: Notch binding; protein binding. Biological process: negative regulation of Notch signaling pathway; heart morphogenesis; sensory organ development; Notch signaling pathway; sensory organ precursor cell division; asymmetric cell division.		22.0816	523.049	24.8871	XP_001964707.1
DS10_00003118	FBgn0034289	CG10910	n/a	Molecular function is unknown. Biological process: regulation of DNA-dependent transcription, elongation; regulation of transcription from RNA polymerase II promoter.		22.0404	1557.79	67.8041	AAL48836.1
DS10_00007355	FBgn0051004	CG31004	mesh	Molecular function is unknown. Biological process: establishment of endothelial barrier; homophilic cell adhesion; septate junction assembly.	AMOP domain	21.9527	240.775	14.4025	NP_001163782.1
DS10_00011874	FBgn0041780	CG11833	Ssl2	Molecular function: strictosidine synthase activity. Biological process: biosynthetic process.	Six-bladed beta-propeller, TolB-like	21.9265	33.5843	3.74718	XP_002098646.1
DS10_00008694	FBgn0035583	CG13704	n/a	Molecular function is unknown. Biological process is unknown.		21.9198	344.265	18.4526	XP_002083690.1
DS10_00003842	FBgn0001224	CG4463	Hsp23	Molecular function: protein binding. Biological process: response to hypoxia; cold acclimation.	Alpha crystallin/Hsp20 domain	21.9115	18.1007	1.30716	NP_523999.1
DS10_00010775	FBgn0037140	CG7442	SLC22A	Molecular function: secondary active organic cation transmembrane transporter activity. Biological process: transmembrane transport.	Major facilitator, sugar transporter-like	21.8548	43.979	4.87905	XP_002040882.1
DS10_00004340	FBgn0036996	CG5932	mag	Molecular function: sterol esterase activity. Biological process: triglyceride homeostasis; cholesterol homeostasis.	Alpha/Beta hydrolase fold	21.7532	1012.85	46.6213	XP_002085662.1
DS10_00010305	FBgn0037678	CG16749	n/a	Molecular function: serine-type endopeptidase activity. Biological process: proteolysis.	Serine proteases, trypsin domain	21.7183	258.531	15.394	XP_002104144.1
DS10_00006580	FBgn0019928	CG4812	Ser8	Molecular function: serine-type peptidase activity; serine-type endopeptidase activity. Biological process: proteolysis.	Serine proteases, trypsin domain	21.6976	218.265	13.7602	XP_001975764.1
DS10_00006900	FBgn0259101	CG42249	n/a	Molecular function: nucleoside-triphosphatase activity; nucleoside-diphosphatase activity. Biological process: nucleotide catabolic process.	5'-Nucleotidase/apyrase	21.6786	257.278	15.3766	NP_572683.1
DS10_00002500	FBgn0010241	CG8523	Mdr50	Molecular function: ATPase activity, coupled; drug transmembrane transporter activity. Biological process: response to methotrexate.	ABC transporter type 1, transmembrane domain	21.5627	119.603	9.30165	XP_002091284.1
DS10_00007616	FBgn0086608	CG34112	n/a	Molecular function is unknown. Biological process is unknown.		21.5576	75.8509	7.11352	XP_002137881.1
DS10_00004974	FBgn0024361	CG11415	Tsp2A	Molecular function is unknown. Biological process is unknown.	Tetraspanin	21.4376	434.754	21.5619	NP_525037.1
DS10_00007585	FBgn0051516	CG31516	n/a	Molecular function is unknown. Biological process is unknown.	Domain of unknown function DUF4773	21.4225	49.2861	5.4615	XP_002102058.1
DS10_00011137	FBgn0263607	CG32155	l(3)72Dp	Molecular function: omega peptidase activity. Biological process: glutamine metabolic process.	Class I glutamine amidotransferase-like	21.2931	59.777	6.19524	XP_002085077.1
DS10_00005906	FBgn0030688	CG8952	n/a	Molecular function: serine-type endopeptidase activity. Biological process: proteolysis.	Serine proteases, trypsin domain	21.2395	137.517	10.2441	XP_001965936.1
DS10_00012099	FBgn0042104	CG18747	n/a	Molecular function is unknown. Biological process is unknown.	Arrestin, C-terminal	21.2377	16.3261	1.08552	XP_002096631.1
DS10_00002078	FBgn0034717	CG5819	n/a	Molecular function is unknown. Biological process is unknown.	Leucine-rich repeat domain superfamily	21.1517	57.7472	6.08447	XP_002039888.1
DS10_00003304	FBgn0025709	CG8083	CNT2	Molecular function: nucleoside:sodium symporter activity. Biological process: transport.	Concentrative nucleoside transporter	21.0618	35.1468	4.14807	XP_002089732.1
DS10_00004634	FBgn0052476	CG32476	mthl14	Molecular function: G-protein coupled receptor activity. Biological process: G-protein coupled receptor signaling pathway.	Methuselah, N-terminal domain superfamily, GPCR	21.0546	20.2905	1.97021	XP_002081420.1
DS10_00011694	FBgn0039085	CG10170	Ugt303B3	Molecular function: 2-hydroxyacylsphingosine 1-beta-galactosyltransferase activity. Biological process: metabolic process.	UDP-glucuronosyl/UDP-glucosyltransferase	21.0147	14.6028	0.771947	XP_002098438.1
DS10_00004761	FBgn0031033	CG14219	n/a	Molecular function: transferase activity, transferring acyl groups other than amino-acyl groups. Biological process is unknown.	Acyltransferase 3	20.9909	11.3072	0.167216	NP_608322.1
DS10_00001617	FBgn0032144	CG17633	n/a	Molecular function: metallocarboxypeptidase activity. Biological process: neurogenesis.	Carboxypeptidase, activation peptide	20.9432	1423.46	66.4924	ACI16535.1
DS10_00002077	FBgn0020307	CG5799	dve	Molecular function: sequence-specific DNA binding transcription factor activity; AT DNA binding. Biological process: copper ion import; negative regulation of transcription from RNA polymerase II promoter; imaginal disc-derived wing morphogenesis; midgut development; imaginal disc-derived leg joint morphogenesis.	DNA-binding protein SATB1/SATB2	20.9011	18.7391	1.70289	XP_001975180.1
DS10_00006875	FBgn0052669	CG32669	n/a	Molecular function: transporter activity. Biological process: transport.	Sodium/glucose symporter superfamily	20.8237	38.5479	4.55581	NP_727460.1
DS10_00010575	FBgn0039087	CG10168	Ugt303B2	Molecular function: 2-hydroxyacylsphingosine 1-beta-galactosyltransferase activity. Biological process: metabolic process.	UDP-glucuronosyl/UDP-glucosyltransferase	20.6681	15.0703	0.95113	XP_002097440.1
DS10_00006632	FBgn0250842	CG17575	n/a	Molecular function is unknown. Biological process: sperm competition; multicellular organism reproduction; regulation of female receptivity, post-mating.	CAP domain, Venom allergen 3, insect	20.6556	41.0334	4.87237	NP_001188917.1
DS10_00004373	FBgn0035360	CG1246	n/a	Molecular function is unknown. Biological process is unknown.		20.5625	497.586	24.8111	NP_647736.1
DS10_00002192	FBgn0033999	CG8093	n/a	Molecular function: lipase activity; triglyceride lipase activity. Biological process: multicellular organism reproduction.	Alpha/Beta hydrolase fold	20.4743	1708.07	79.9899	NP_611020.1
DS10_00009224	n/a	n/a	n/a	BlastP against D. melanogaster AA	n/a	20.3971	33.2536	4.08096	XP_001978936.1
DS10_00008540	FBgn0051323	CG31323	n/a	Molecular function is unknown. Biological process is unknown.		20.3595	284.743	17.2563	XP_002105031.1
DS10_00003387	FBgn0033443	CG1698	n/a	Molecular function: neurotransmitter transporter activity; potassium:amino acid symporter activity. Biological process: neurotransmitter transport.	Sodium:neurotransmitter symporter	20.2831	19.6952	2.06924	XP_001969155.1
DS10_00010322	FBgn0038419	CG14879	n/a	Molecular function: carbohydrate binding. Biological process is unknown.	Concanavalin A-like lectin/glucanase domain superfamily	20.2308	44.7662	5.3565	NP_732131.1
DS10_00008447	FBgn0085424	CG34395	nub	Molecular function: RNA polymerase II core promoter proximal region sequence-specific DNA binding transcription factor activity involved in positive regulation of transcription. Biological process: wing disc development.	Homeobox, conserved site	20.2186	16.0281	1.25744	XP_001969720.1
DS10_00004462	FBgn0035264	CG2069	Oseg4	Molecular function is unknown. Biological process: cilium assembly; neurogenesis.	Anaphase-promoting complex subunit 4, WD40 domain	20.1543	16.1781	1.29758	XP_001971190.1
DS10_00012904	FBgn0038482	CG4053	n/a	Molecular function: serine-type endopeptidase activity. Biological process: proteolysis.	Serine proteases, trypsin domain	20.1168	196.194	13.6728	XP_002103100.1
DS10_00005901	FBgn0026374	CG8497	Rhp	Molecular function: GTP-Rho binding. Biological process: signal transduction.	HR1 rho-binding domain	20.0667	16.7782	1.45337	XP_002100725.1
DS10_00006761	FBgn0033294	CG8693	Mal-A4	Molecular function: alpha-glucosidase activity. Biological process: carbohydrate metabolic process.	Glycoside hydrolase superfamily	20.0306	401.788	22.0996	XP_002089640.1
DS10_00011524	FBgn0036321	CG14120	n/a	Molecular function: metal ion binding; hydrolase activity; nucleic acid binding. Biological process is unknown.	DNA/RNA non-specific endonuclease	19.9598	21.8781	2.60362	XP_001972591.1
DS10_00006480	FBgn0030367	CG1488	Cyp311a1	Molecular function: electron carrier activity. Biological process: oxidation-reduction process.	Cytochrome P450 superfamily	19.9536	17.953	1.74593	XP_001978395.1
DS10_00007171	FBgn0036978	CG5528	Toll-9	Molecular function: transmembrane signaling receptor activity. Biological process: signal transduction.	Leucine-rich repeat	19.93	13.6136	0.782402	XP_002040650.1
DS10_00009803	FBgn0038595	CG7142	n/a	Molecular function: serine-type endopeptidase activity. Biological process: proteolysis.	Serine proteases, trypsin domain	19.9268	18.1908	1.81807	XP_002040984.1
DS10_00013266	FBgn0038466	CG8907	n/a	Molecular function is unknown. Biological process is unknown.	Epidermal growth factor receptor kinase substrate 8-like	19.8794	104.882	9.1378	XP_002103124.1
DS10_00006765	FBgn0033296	CG11669	Mal-A7	Molecular function: alpha-glucosidase activity. Biological process: carbohydrate metabolic process.	Glycoside hydrolase superfamily	19.8577	2690.4	141.446	NP_610383.1
DS10_00003129	FBgn0028983	CG10913	Spn55B	Molecular function: serine-type endopeptidase inhibitor activity. Biological process: negative regulation of proteolysis.	Serpin superfamily	19.8573	139.127	10.8559	XP_002091979.1
DS10_00013253	FBgn0036324	CG12520	n/a	Molecular function is unknown. Biological process is unknown.	F-box domain	19.7849	12.8777	0.661755	NP_001097596.1
DS10_00010399	FBgn0037906	CG14704	PGRP-LB	BlastP against D. melanogaster AA	Peptidoglycan recognition protein LB, N-acetylmuramoyl-L-alanine amidase/PGRP domain superfamily	19.6733	168.993	12.7532	NP_731575.1
DS10_00004050	FBgn0036422	CG3868	n/a	Molecular function is unknown. Biological process is unknown.	n/a	19.5842	464.381	24.7835	XP_002094781.1
DS10_00000635	FBgn0031653	CG8871	Jon25Biii	Molecular function: endopeptidase activity. Biological process: proteolysis.	Serine proteases, trypsin domain	19.4663	832.695	40.8818	NP_608881.1
DS10_00005312	FBgn0011822	CG13374	Pgcl	Molecular function: aspartic-type endopeptidase activity. Biological process: proteolysis.	Aspartic peptidase, active site	19.4329	246.175	16.2191	XP_001982388.1
DS10_00012915	FBgn0038391	CG10278	GATAe	Molecular function: sequence-specific DNA binding RNA polymerase II transcription factor activity. Biological process: positive regulation of transcription from RNA polymerase II promoter; negative regulation of gene expression; antimicrobial humoral response; midgut development; endoderm development.	Transcription factor GATA	19.4265	20.4598	2.4496	XP_002103236.1
DS10_00006143	FBgn0032074	CG9494	Tsp29Fa	Molecular function is unknown. Biological process is unknown.	Tetraspanin/Peripherin	19.4076	976.35	49.8475	XP_002088872.1
DS10_00003457	FBgn0034647	CG15678	pirk	Molecular function: protein binding; receptor binding. Biological process: negative regulation of innate immune response; negative regulation of immune response; negative regulation of peptidoglycan recognition protein signaling pathway; response to symbiotic bacterium.		19.3032	262.246	17.1782	XP_002039795.1
DS10_00003094	FBgn0034275	CG5002	n/a	Molecular function: high affinity sulfate transmembrane transporter activity. Biological process: sulfate transport.	SLC26A/SulP transporter	19.2373	33.508	4.41888	XP_002081978.1
DS10_00002893	FBgn0033214	CG1941	n/a	Molecular function: transferase activity, transferring acyl groups other than amino-acyl groups. Biological process is unknown.	Diacylglycerol acyltransferase	19.0793	35.1002	4.64127	XP_001970581.1
DS10_00004154	FBgn0035665 + FBgn0035663 + FBgn0028980 + FBgn0035669	CG6483 + CG6462 + CG6586 + CG6592	Jon65Aiii + tant	BlastP against D. melanogaster AA	Jonah 65Aiii, Peptidase S1, PA clan; tantalus, Tantalus-like; Peptidase S1, PA clan	18.967	3328.18	181.586	XP_002083806.1
DS10_00013465	FBgn0038740	CG4562	n/a	Molecular function: ATPase activity, coupled to transmembrane movement of substances; transporter activity. Biological process: transmembrane transport.	ABC transporter type 1, transmembrane domain	18.7243	72.5012	7.66733	XP_001979493.1
DS10_00010283	FBgn0033051	CG7863	Strica	Molecular function: cysteine-type endopeptidase activity. Biological process: salivary gland histolysis; programmed cell death; nurse cell apoptotic process; positive regulation of compound eye retinal cell programmed cell death.	Caspase-like domain superfamily	18.7009	29.7187	4.1546	XP_002090098.1
DS10_00008655	FBgn0040257	CG4739	Ugt302E1	Molecular function: glucuronosyltransferase activity; 2-hydroxyacylsphingosine 1-beta-galactosyltransferase activity. Biological process: metabolic process.	UDP-glucuronosyl/UDP-glucosyltransferase	18.6613	17.3451	1.96326	XP_001980607.1
DS10_00002743	FBgn0022700	CG3986	Cht4	BlastP against D. melanogaster AA	Chitinase 4, Glycoside hydrolase family 18, catalytic domain	18.6444	165.477	13.2121	XP_001974997.1
DS10_00005816	n/a	n/a	n/a	BlastP against D. melanogaster AA	n/a	18.6253	25.9249	3.66906	XP_002138408.1
DS10_00002123	FBgn0034758	CG13510	n/a	Molecular function is unknown. Biological process: cold acclimation.	LITAF domain containing protein	18.5732	503.178	27.3152	XP_002039944.1
DS10_00005768	FBgn0265186	CG44251	n/a	Molecular function is unknown. Biological process is unknown.	DM9 repeat	18.5611	345.937	21.1459	XP_002081277.1
DS10_00003119	FBgn0034290	CG5773	n/a	Molecular function is unknown. Biological process is unknown.		18.5276	20.5872	2.76387	XP_002082013.1
DS10_00003488	FBgn0034662	CG13492	n/a	Molecular function is unknown. Biological process is unknown.	Domain of unknown function DUF753	18.4221	828.759	42.8743	XP_002039827.1
DS10_00012981	FBgn0010223	CG12232	Gαf	Molecular function: GTPase activity. Biological process: positive regulation of hemocyte proliferation; mesoderm development.	G protein alpha subunit, helical insertion	18.4159	39.8172	5.31811	XP_002095101.1
DS10_00001793	FBgn0032235	CG5096	n/a	Molecular function is unknown. Biological process is unknown.	Leucine-rich repeat domain superfamily	18.3657	668.315	35.0767	XP_001969469.1
DS10_00006048	FBgn0024997	CG2681	n/a	Molecular function: ubiquitin-protein ligase activity; zinc ion binding. Biological process: protein ubiquitination; ubiquitin-dependent protein catabolic process; multicellular organismal development.	Zinc finger, RING/FYVE/PHD-type	18.333	36.8409	5.04166	XP_002106009.1
DS10_00010517	FBgn0051431	CG31431	n/a	Molecular function: fibroblast growth factor-activated receptor activity. Biological process: fibroblast growth factor receptor signaling pathway.	Immunoglobulin-like domain	18.2086	18.2838	2.3275	XP_001982357.1
DS10_00003271	FBgn0034160	CG5550	n/a	Molecular function is unknown. Biological process is unknown.	Fibrinogen, conserved site	18.1991	942.152	50.6721	NP_611160.2
DS10_00009570	FBgn0038353	CG5399	n/a	Molecular function is unknown. Biological process is unknown.	Calycin	18.0955	1765.39	93.7276	XP_002103284.1
DS10_00011296	FBgn0004228	CG7936	mex1	Molecular function is unknown. Biological process: embryo development; midgut development.		18.0665	346.228	21.6867	XP_002095162.1
DS10_00006756	FBgn0002569	CG8694	Mal-A2	Molecular function: alpha-glucosidase activity. Biological process: glucose metabolic process.	Glycoside hydrolase superfamily	18.0571	1263.46	67.4166	NP_476625.2
DS10_00001953	FBgn0032373	CG12602	Vha100-5	Molecular function: proton-transporting ATPase activity, rotational mechanism. Biological process: ATP hydrolysis coupled proton transport.	ATPase, V0 complex, subunit 116kDa, eukaryotic	18.0469	349.52	21.8804	XP_002088388.1
DS10_00000033	FBgn0031249	CG11911	n/a	Molecular function: serine-type endopeptidase activity. Biological process: proteolysis.	Serine proteases, trypsin domain	18.0223	3129.02	183.452	XP_002087414.1
DS10_00004111	FBgn0036288	CG10660	n/a	Molecular function is unknown. Biological process is unknown.		17.9506	32.5295	4.67053	XP_002094591.1
DS10_00002477	FBgn0033788	CG13323	n/a	Molecular function is unknown. Biological process is unknown.	Transcription activator MBF2	17.9298	10474	378.56	XP_002033647.1
DS10_00006836	FBgn0029835	CG5921	n/a	Molecular function is unknown. Biological process is unknown.	Harmonin	17.9217	18.7099	2.51946	XP_002101344.1
DS10_00001287	FBgn0032049	CG13095	Bace	Molecular function: aspartic-type endopeptidase activity. Biological process: proteolysis.	Aspartic peptidase, active site	17.9203	2775.05	162.42	NP_609235.1
DS10_00005550	FBgn0034045	CG8249	n/a	Molecular function: glucose transmembrane transporter activity. Biological process: transmembrane transport.	Major facilitator, sugar transporter-like	17.8732	29.1959	4.32989	XP_002081668.1
DS10_00003375	FBgn0033437	CG12926	n/a	Molecular function: vitamin E binding. Biological process: transport.	CRAL/TRIO, N-terminal domain superfamily	17.848	151.969	12.9025	XP_002089825.1
DS10_00013244	FBgn0038194	CG3050	Cyp6d5	Molecular function: electron carrier activity. Biological process: oxidation-reduction process.	Cytochrome P450 superfamily	17.8463	161.665	13.5457	XP_002031255.1
DS10_00004847	FBgn0011834	CG2071	Ser6	Molecular function: serine-type peptidase activity; serine-type endopeptidase activity. Biological process: proteolysis.	Serine proteases, trypsin domain	17.7484	682.668	36.5486	XP_002101942.1
DS10_00001308	FBgn0031741	CG11034	n/a	Molecular function: dipeptidyl-peptidase activity. Biological process: proteolysis.	Peptidase S9, prolyl oligopeptidase, catalytic domain	17.6986	132.116	11.6178	XP_002089176.1
DS10_00002513	FBgn0033928	CG13941	Arc2	Molecular function is unknown. Biological process is unknown.		17.6722	33.8283	4.88973	XP_001360539.1
DS10_00004077	FBgn0259175	CG42280	ome	Molecular function: dipeptidyl-peptidase activity. Biological process: proteolysis.	Peptidase S9, prolyl oligopeptidase, catalytic domain	17.6612	72.165	8.03344	NP_524739.1
DS10_00004183	FBgn0261631	CG42714	n/a	Molecular function is unknown. Biological process is unknown.		17.5538	9.30804	0.271237	NP_001189053.1
DS10_00000120	FBgn0031579	CG15422	n/a	Molecular function is unknown. Biological process is unknown.		17.4956	737.212	39.5766	XP_002087891.1
DS10_00008412	FBgn0038730, FBgn0038731	CG6300, CG11659	n/a	Molecular function: long-chain fatty acid transporter activity. Biological process: metabolic process.	AMP-dependent synthetase-like superfamily	17.4699	21.7954	3.32763	XP_002096346.1
DS10_00000941	FBgn0035154	CG3344	hiro	Molecular function: serine-type carboxypeptidase activity. Biological process: proteolysis.	Alpha/Beta hydrolase fold	17.4202	18.4679	2.62519	XP_002089993.1
DS10_00011388	FBgn0051436	CG31436	n/a	Molecular function: transferase activity, transferring phosphorus-containing groups. Biological process is unknown.	CHK kinase-like	17.3403	34.6644	5.06738	XP_002043924.1
DS10_00009225	FBgn0051547	CG31547	NKCC	Molecular function: amino acid transmembrane transporter activity; sodium:potassium:chloride symporter activity. Biological process: amino acid transmembrane transport; transport.	sodium potassium chloride cotransporter	17.3182	93.8517	9.44465	XP_001978936.1
DS10_00005769	FBgn0004512	CG3879	Mdr49	Molecular function: ATPase activity, coupled; drug transmembrane transporter activity. Biological process: response to hypoxia; response to methotrexate; germ cell migration.	Multi drug resistance 49, ABC transporter type 1, transmembrane domain	17.2042	74.247	8.31637	XP_002033639.1
DS10_00004933	FBgn0054026	CG34026	n/a	Molecular function is unknown. Biological process is unknown	Transcription activator MBF2	17.1478	3207.23	198.203	XP_002101745.1
DS10_00001965	FBgn0264750	CG44008	n/a	Molecular function: serine-type endopeptidase inhibitor activity. Biological process: multicellular organism reproduction.	Kazal domain	17.002	5079.45	267.363	XP_002088401.1
DS10_00006656	FBgn0033760	CG8785	n/a	Molecular function: amino acid transmembrane transporter activity. Biological process: amino acid transmembrane transport.	Amino acid transporter, transmembrane domain	16.9293	156.331	13.8397	XP_001975875.1
DS10_00009983	FBgn0085345	CG34316	n/a	Molecular function is unknown. Biological process is unknown.	Haemolymph juvenile hormone binding	16.8996	11.6369	1.01341	ABN49395.1
DS10_00007583	FBgn0037215	CG12582	β-Man	Molecular function: beta-mannosidase activity. Biological process: carbohydrate metabolic process.	β-Mannosidase, Beta-Galactosidase/glucuronidase domain superfamily	16.8051	81.8559	8.90165	XP_001978783.1
DS10_00000965	FBgn0036622	CG4753	Agpat4	Molecular function: 1-acylglycerol-3-phosphate O-acyltransferase activity. Biological process: metabolic process	1-Acylglycerol-3-phosphate O-acyltransferase 4	16.7244	26.5196	4.32687	XP_002086369.1
DS10_00011020	FBgn0039085	CG10170	Ugt303B3	Molecular function: 2-hydroxyacylsphingosine 1-beta-galactosyltransferase activity. Biological process: metabolic process.	UDP-glucuronosyl/UDP-glucosyltransferase	16.5174	10.8045	0.891032	XP_002104562.1
DS10_00008942	FBgn0052181	CG32181	n/a	Molecular function is unknown. Biological process is unknown.		16.5012	14.6227	1.90917	NP_649004.1
DS10_00013029	FBgn0037782	CG12813	Npc2d	Molecular function: sterol binding. Biological process: sterol transport.	Immunoglobulin E-set	16.4574	437.627	27.3517	XP_002104027.1
DS10_00008875	FBgn0264488	CG43896	n/a	Molecular function: structural constituent of peritrophic membrane. Biological process: chitin metabolic process.	Chitin binding domain	16.3898	26.4056	4.4112	NP_001261732.1
DS10_00010179	FBgn0053514	CG33514	n/a	Molecular function: vitamin E binding. Biological process: neurogenesis.	CRAL/TRIO, N-terminal domain	16.3029	184.768	16.0211	XP_002083628.1
DS10_00012210	FBgn0051343	CG31343	n/a	Molecular function: aminopeptidase activity. Biological process: proteolysis.	Aminopeptidase N-like , N-terminal	16.2956	516.298	31.7856	XP_002098186.1
DS10_00004410	FBgn0040507	CG5712	ACXD	Molecular function: adenylate cyclase activity. Biological process: cyclic nucleotide biosynthetic process; intracellular signal transduction.	Adenylyl cyclase X D	16.167	11.9816	1.30639	XP_002093250.1
DS10_00000636	FBgn0020906	CG8867	Jon25Bi	BlastP against D. melanogaster AA	Jonah 25Bi, Peptidase S1, PA clan	15.9176	2880.21	195.764	XP_002078182.1
DS10_00006871	FBgn0030234	CG15211	n/a	Molecular function is unknown. Biological process is unknown	Marvel domain	15.9129	141.101	13.524	XP_002106628.1
DS10_00006538	FBgn0033873	CG6337	n/a	Molecular function: cysteine-type endopeptidase activity. Biological process: proteolysis.	Cathepsin propeptide inhibitor domain (I29)	15.8501	15.9948	2.5189	XP_002090863.1
DS10_00005767	FBgn0033787	CG13321	n/a	Molecular function is unknown. Biological process: neurogenesis.	DM9 repeat	15.8412	1491.33	89.8138	XP_002081278.1
DS10_00002608	FBgn0033720	CG13160	n/a	Molecular function: peptidase activity. Biological process: proteolysis.	Peptidase M28	15.7984	10.5681	1.00295	NP_725145.2
DS10_00013096	FBgn0039761	CG18404	n/a	Molecular function is unknown. Biological process: neurogenesis.		15.7838	2187.17	145.511	XP_002099378.1
DS10_00005633	FBgn0015039	CG4486	Cyp9b2	Molecular function: electron carrier activity. Biological process: oxidation-reduction process.	Cytochrome P450 superfamily	15.7239	296.188	21.9181	XP_002089433.1
DS10_00006831	FBgn0029843	CG5905	Nep1	Molecular function: metallopeptidase activity; metalloendopeptidase activity. Biological process: proteolysis.	Neprilysin 1, Metallopeptidase, catalytic domain superfamily	15.6562	35.7917	5.78834	NP_511056.2
DS10_00006453	FBgn0030396	CG2556	n/a	Molecular function is unknown. Biological process is unknown.		15.6363	205.235	17.588	XP_002106782.1
DS10_00007244	FBgn0035767	CG8596	Cln7	Molecular function is unknown. Biological process: transmembrane transport.	Major facilitator superfamily	15.6354	28.7664	4.94697	XP_002094028.1
DS10_00008941	FBgn0036752	CG5992	Adgf-A	Molecular function: growth factor activity; adenosine deaminase activity. Biological process: cell proliferation; hemocyte differentiation.	Adenosine deaminase-related growth factor A,	15.6352	34.7183	5.64268	XP_002085308.1
DS10_00003591	FBgn0034247	CG6484	n/a	Molecular function: glucose transmembrane transporter activity. Biological process: transmembrane transport.	Major facilitator, sugar transporter-like	15.6064	4986.92	278.157	XP_002092061.1
DS10_00008344	FBgn0039313	CG11892	n/a	Molecular function: transferase activity, transferring phosphorus-containing groups. Biological process is unknown.	CHK kinase-like	15.595	129.537	12.9187	XP_001981824.1
DS10_00008470	FBgn0051089	CG31089	n/a	Molecular function: triglyceride lipase activity. Biological process: lipid metabolic process.	Alpha/Beta hydrolase fold	15.5713	8.34905	0.401912	XP_002104989.1
DS10_00006558	FBgn0261989	CG42807	n/a	Molecular function is unknown. Biological process is unknown.		15.563	291.57	21.8901	NP_610889.1
DS10_00010146	FBgn0038194	CG3050	Cyp6d5	Molecular function: electron carrier activity. Biological process: oxidation-reduction process.	Cytochrome P450 superfamily	15.383	161.014	15.48	XP_001979871.1
DS10_00003149	FBgn0034085	CG18243	Ptp52F	Molecular function: protein tyrosine phosphatase activity. Biological process: motor neuron axon guidance; axon guidance.	Protein tyrosine phosphatase 52F, Fibronectin type III	15.374	30.0416	5.20002	XP_002081725.1
DS10_00005712	FBgn0050115	CG30115	GEFmeso	Molecular function: Ral GTPase binding. Biological process: imaginal disc-derived wing vein specification; imaginal disc-derived leg morphogenesis.	Guanine nucleotide exchange factor in mesoderm, Dbl homology (DH) domain	15.3622	17.8078	3.16823	XP_001974700.1
DS10_00003034	FBgn0035040	CG4741	n/a	Molecular function is unknown. Biological process is unknown.		15.3013	387.738	27.1237	NP_001286850.1
DS10_00006829	FBgn0040069	CG32754	vanin-like	Molecular function: pantetheine hydrolase activity. Biological process: nitrogen compound metabolic process.	Biotinidase/VNN family, Carbon-nitrogen hydrolase superfamily	15.2274	22.892	4.21933	NP_572297.1
DS10_00002000	FBgn0263235	CG16997	Phae2	Molecular function: metalloendopeptidase activity; serine-type endopeptidase activity. Biological process: proteolysis.	Serine proteases, trypsin domain	15.1148	391.48	27.7166	NP_609551.2
DS10_00009028	FBgn0010040	CG11512	GstD4	BlastP against D. melanogaster AA	Glutathione S transferase D4	15.0643	10.276	1.10894	XP_001844244.1
DS10_00012522	FBgn0038199	CG14358	CCHa1	Molecular function: neuropeptide hormone activity. Biological process: neuropeptide signaling pathway.	CCHamide-1, Neuropeptide CCHamide 1/2	15.0073	11.7541	1.60406	XP_001979877.1
DS10_00006262	FBgn0030600	CG32592	hiw	Molecular function: protein binding. Biological process: negative regulation of synaptic growth at neuromuscular junction; negative regulation of BMP signaling pathway; BMP signaling pathway; autophagy; regulation of synaptic growth at neuromuscular junction; synapse organization.	highwire, Immunoglobulin E-set	14.9982	14.1205	2.28342	XP_001978132.1
DS10_00006843	FBgn0030040	CG15347	n/a	Molecular function is unknown. Biological process is unknown.	Domain of unknown function DUF753	14.9769	572.231	37.706	NP_001188562.1
DS10_00001715	FBgn0028940	CG8864	Cyp28a5	BlastP against D. melanogaster AA	Cytochrome P450 superfamily	14.9746	31.0936	5.492	NP_609694.1
DS10_00010544	FBgn0039045	CG17119	n/a	Molecular function: amino acid transmembrane transporter activity. Biological process: amino acid transmembrane transport.	Lysosomal cystine transporter	14.9626	40.8267	6.4596	XP_002104509.1
DS10_00005552	FBgn0034047	CG12970	n/a	Molecular function is unknown. Biological process is unknown.	Mab-21 domain	14.9325	14.8763	2.53887	XP_002092318.1
DS10_00011127	FBgn0051431	CG31431	n/a	Molecular function: fibroblast growth factor-activated receptor activity. Biological process: fibroblast growth factor receptor signaling pathway.	Immunoglobulin-like domain	14.8925	14.5655	2.44126	NP_732672.1
DS10_00013550	FBgn0031489	CG17224	n/a	Molecular function: uridine phosphorylase activity. Biological process: nucleotide catabolic process; nucleoside metabolic process.	Nucleoside phosphorylase domain	14.891	17.3712	3.23829	XP_001968506.1
DS10_00004136	FBgn0027843	CG6906	CAH2	Molecular function: carbonate dehydratase activity. Biological process is unknown.	Carbonic anhydrase 2, Alpha carbonic anhydrase domain	14.8845	42.2208	6.66509	NP_648555.1
DS10_00008653	FBgn0040257	CG4739	Ugt302E1	Molecular function: glucuronosyltransferase activity; 2-hydroxyacylsphingosine 1-beta-galactosyltransferase activity. Biological process: metabolic process.	UDP-glucuronosyl/UDP-glucosyltransferase	14.8317	31.13	5.5594	NP_652626.1
DS10_00000653	FBgn0031636	CG12194	n/a	Molecular function is unknown. Biological process: transmembrane transport.	Major facilitator superfamily	14.7343	49.8844	7.42538	NP_001162873.1
DS10_00008148	FBgn0052407	CG32407	n/a	Molecular function is unknown. Biological process is unknown.	CRAL/TRIO, N-terminal domain superfamily	14.5613	21.5172	4.15662	XP_001972044.1
DS10_00000929	FBgn0001987	CG3903	Gli	Molecular function: carboxylesterase activity. Biological process: synaptic target recognition; female meiosis chromosome segregation; maintenance of imaginal disc-derived wing hair orientation; border follicle cell migration; establishment of blood-nerve barrier; regulation of tube size, open tracheal system; septate junction assembly.	Gliotactin, Alpha/Beta hydrolase fold	14.5307	22.9469	4.44651	XP_001968991.1
DS10_00005697	FBgn0033204	CG2065	n/a	Molecular function: nucleotide binding; oxidoreductase activity. Biological process: metabolic process.	NAD(P)-binding domain superfamily	14.4569	41.2129	6.71302	XP_001970593.1
DS10_00002218	FBgn0034612	CG10505	n/a	Molecular function: ATPase activity, coupled to transmembrane movement of substances; transporter activity. Biological process: response to zinc ion; response to copper ion.	ABC transporter type 1, transmembrane domain superfamily	14.2599	14.7113	2.76139	NP_611571.2
DS10_00001999	FBgn0263234	CG16996	Phae1	Molecular function: metalloendopeptidase activity; serine-type endopeptidase activity. Biological process: proteolysis.	Phaedra 1, Serine proteases, trypsin domain	14.2154	507.499	35.5636	XP_002079197.1
DS10_00002799	FBgn0033502	CG12910	n/a	Molecular function is unknown. Biological process is unknown.	Glycosyltransferase family 92	13.9848	8.18268	0.727121	XP_002080884.1
DS10_00006794	FBgn0043575	CG14745	PGRP-SC2	Molecular function: peptidoglycan binding. Biological process: negative regulation of innate immune response.	Peptidoglycan recognition protein SC2, N-acetylmuramoyl-L-alanine amidase/PGRP domain superfamily	13.9193	2330.17	178.594	XP_002089679.1
DS10_00006144	FBgn0032075	CG9496	Tsp29Fb	Molecular function is unknown. Biological process is unknown.	Tetraspanin 29Fb, Tetraspanin/Peripherin	13.8465	1204.28	82.1515	XP_002078718.1
DS10_00000511	FBgn0040262	CG13270	Ugt37C2	Molecular function: glucuronosyltransferase activity. Biological process: metabolic process.	UDP-glucuronosyl/UDP-glucosyltransferase	13.8258	89.6531	10.852	NP_652627.2
DS10_00002888	FBgn0033221	CG12825	n/a	Molecular function is unknown. Biological process is unknown		13.7904	1166.4	79.5309	XP_002089524.1
DS10_00004608	FBgn0035131	CG17084	mthl9	Molecular function: G-protein coupled receptor activity. Biological process: G-protein coupled receptor signaling pathway; determination of adult lifespan; response to stress.	methuselah-like 9, Methuselah, N-terminal domain	13.6226	15.802	3.31151	XP_002092999.1
DS10_00004781	FBgn0259834	CG8062	out	Molecular function: monocarboxylic acid transmembrane transporter activity. Biological process: programmed cell death; germ cell development.	outsiders, Major facilitator superfamily	13.6057	57.9521	8.57892	XP_001977766.1
DS10_00011743	FBgn0038756	CG4783	n/a	Molecular function is unknown. Biological process is unknown.		13.556	298.278	25.0917	XP_002086819.1
DS10_00002942	FBgn0034887	CG5428	St1	Molecular function: sulfotransferase activity. Biological process: sulfation; xenobiotic metabolic process.	Sulfotransferase 1, P-loop containing nucleoside triphosphate hydrolase	13.5399	19.1229	4.05669	XP_002082822.1
DS10_00005731	FBgn0063497	CG17524	GstE3	Molecular function: glutathione transferase activity. Biological process: glutathione metabolic process.	Glutathione Transferase family	13.3472	94.9232	11.7192	XP_002091929.1
DS10_00001606	FBgn0051710	CG31710	n/a	Molecular function is unknown. Biological process is unknown.		13.3296	11.2258	2.0581	XP_002088959.1
DS10_00000360	FBgn0040959	CG17814	Peritrophin-15a	Molecular function: chitin binding. Biological process is unknown.	Chitin binding domain superfamily	13.3263	8128.07	415.001	XP_002088804.1
DS10_00000538	FBgn0031516	CG9663	n/a	Molecular function: ATPase activity, coupled to transmembrane movement of substances; transporter activity. Biological process is unknown.	ABC transporter family G domain	13.2335	23.5661	5.02786	XP_001968539.1
DS10_00010257	FBgn0038972	CG7054	n/a	Molecular function: phosphatidylethanolamine binding. Biological process is unknown.	PEBP-like superfamily	13.131	817.845	56.2936	XP_002098296.1
DS10_00003626	FBgn0035094	CG9380	n/a	Molecular function is unknown. Biological process is unknown.	Peptidoglycan recognition protein	13.1057	360.271	29.1173	XP_002018326.1
DS10_00004056	FBgn0087007	CG42230	bbg	Molecular function is unknown. Biological process: imaginal disc development.	big bang, PDZ domain	13.0587	9.87737	1.67954	NP_648705.2
DS10_00008095	FBgn0036945	CG6981	Ssk	Molecular function is unknown. Biological process: intestinal epithelial cell development; establishment of endothelial barrier; anterior midgut development; septate junction assembly.	Snakeskin	13.0456	380.721	30.6851	NP_649184.1
DS10_00011046	FBgn0038752	CG4462	n/a	Molecular function: secondary active organic cation transmembrane transporter activity. Biological process: transmembrane transport.	Major facilitator superfamily	12.9614	17.5479	3.9149	XP_002043260.1
DS10_00001833	FBgn0051721	CG31721	Trim9	Molecular function: zinc ion binding. Biological process: axon guidance; netrin-activated signaling pathway; axonogenesis; axon midline choice point recognition; neurogenesis.	Tripartite motif containing 9, B30.2/SPRY domain	12.9309	8.35796	1.12562	XP_001969951.1
DS10_00002684	FBgn0010425 + FBgn0050025 + FBgn0011555 + FBgn0011554 + FBgn0043471	CG18681 + CG30025 + CG12385 + CG12386 + CG12388	εTry + θTry + ηTry + κTry	BlastP against D. melanogaster AA	εTrypsin; PA clan; θTrypsin; ηTrypsin (Peptidase S1)	12.8972	4423	307.93	XP_002081034.1
DS10_00008948	FBgn0015765	CG5475	p38a	Molecular function: MAP kinase activity. Biological process: response to stress; biological regulation; response to stimulus; cellular process; immune response; immune system process; cellular response to oxygen-containing compound; cellular component organization or biogenesis; cellular response to metal ion; response to nutrient levels; cellular response to arsenic-containing substance; respons…	p38a MAP kinase, Mitogen-activated protein (MAP) kinase, conserved site	12.8727	18.9091	4.31342	XP_002099284.1
DS10_00008337	FBgn0004509	CG10772	Fur1	Molecular function: serine-type endopeptidase activity. Biological process: synaptic target recognition.	Furin 1, Furin-like repeat	12.8622	1334.56	98.5968	XP_002099041.1
DS10_00010631	FBgn0062412	CG7459	Ctr1B	Molecular function: copper ion transmembrane transporter activity; copper uptake transmembrane transporter activity. Biological process: cellular copper ion homeostasis; copper ion transport; response to metal ion.	Copper transporter 1B, Ctr copper transporter	12.8376	84.7314	11.1612	XP_002096793.1
DS10_00005062	FBgn0036205	CG14131	n/a	Molecular function is unknown. Biological process is unknown.		12.8307	32.7336	6.38024	XP_002084545.1
DS10_00002789	FBgn0033494	CG33135	KCNQ	Molecular function: voltage-gated potassium channel activity. Biological process: embryonic development via the syncytial blastoderm; cardiac muscle contraction; regulation of heart rate.	KCNQ potassium channel, Voltage-gated potassium channel	12.8273	19.3593	4.40225	XP_002033205.1
DS10_00013549	FBgn0051296	CG31296	n/a	Molecular function is unknown. Biological process is unknown.	Venom allergen 3, insect	12.8073	5.96214	0.208071	NP_732044.2
DS10_00008410	FBgn0038730, FBgn0038731	CG6300, CG11659	n/a	Molecular function: long-chain fatty acid transporter activity. Biological process: metabolic process.	AMP-dependent synthetase-like superfamily	12.7535	9.88441	1.80673	XP_002102805.1
DS10_00003573	FBgn0050104	CG30104	NT5E-2	Molecular function: 5'-nucleotidase activity. Biological process: nucleotide catabolic process.	Ecto-5'-nucleotidase 2, 5'-Nucleotidase, conserved site	12.6875	70.8263	10.1661	XP_002034281.1
DS10_00009438	FBgn0039756	CG9743	n/a	Molecular function: stearoyl-CoA 9-desaturase activity. Biological process: oxidation-reduction process; lipid metabolic process.	Acyl-CoA desaturase	12.6845	195.404	20.2038	XP_002105485.1
DS10_00005375	FBgn0030300	CG1747	Sk1	Molecular function: D-erythro-sphingosine kinase activity. Biological process: sphingolipid metabolic process; phosphorylation.	Sphingosine kinase 1, Diacylglycerol kinase, catalytic domain	12.5441	46.8762	8.0851	XP_002106682.1
DS10_00005495	FBgn0286785	CG8095	scb	Molecular function: integrin binding; protein heterodimerization activity	scab, Integrin domain superfamily	12.5114	13.697	3.19421	NP_523750.2
DS10_00001576	FBgn0032116	CG3759	Mco1	Molecular function: ferroxidase activity. Biological process: iron ion homeostasis.	Multicopper oxidase 1 (Mco1)	12.4721	14.4292	3.37342	NP_609287.3
DS10_00001814	FBgn0032253	CG5322	LManI	Molecular function: alpha-mannosidase activity. Biological process: mannose metabolic process.	Lysosomal α-mannosidase I, Galactose mutarotase-like domain superfamily	12.3996	19.6081	4.62624	XP_002088230.1
DS10_00001280	FBgn0032775	CG17544	n/a	Molecular function: pristanoyl-CoA oxidase activity. Biological process: fatty acid beta-oxidation.	Acyl-CoA dehydrogenase/oxidase, N-terminal and middle domain superfamily	12.3471	20.7769	4.86543	XP_002039101.1
DS10_00008949	FBgn0051133	CG31133	Slimp	Molecular function: tRNA binding. Biological process: cellular respiration; mitochondrion morphogenesis.	Class I and II aminoacyl-tRNA synthetase, tRNA-binding arm	12.2484	8.69932	1.5337	XP_002104667.1
DS10_00000527	FBgn0031530	CG3254	Pgant2	Molecular function: polypeptide N-acetylgalactosaminyltransferase activity. Biological process: oligosaccharide biosynthetic process.	Glycosyltransferase 2-like	12.2402	12.897	3.09436	XP_001968556.1
DS10_00005288	FBgn0029932	CG4607	n/a	Molecular function: substrate-specific transmembrane transporter activity. Biological process: transmembrane transport.	Major facilitator, sugar transporter-like	12.1586	417.458	35.0458	NP_572380.1
DS10_00011904	FBgn0038681	CG6042	Cyp12a4	Molecular function: electron carrier activity. Biological process: response to insecticide.	Cytochrome P450 superfamily	12.1396	76.0662	10.9161	XP_002043348.1
DS10_00009346	FBgn0051248	CG31248	n/a	Molecular function is unknown. Biological process is unknown.	Acyl-CoA N-acyltransferase	12.1343	36.3332	7.15899	XP_002038649.1
DS10_00013412	FBgn0034662	CG13492	n/a	BlastP against D. melanogaster AA	Domain of unknown function DUF753	12.0701	7114.89	419.565	NP_726121.3
DS10_00003747	FBgn0086348	CG6781	se	Molecular function: pyrimidodiazepine synthase activity; glutathione dehydrogenase (ascorbate) activity; transferase activity, transferring sulfur-containing groups; protein homodimerization activity; glutathione transferase activity.	sepia, Glutathione S-transferase, C-terminal domain superfamily	12.0655	49.6215	8.56042	XP_002084135.1
DS10_00006115	FBgn0028491	CG2930	n/a	Molecular function: proton-dependent oligopeptide secondary active transmembrane transporter activity. Biological process: oligopeptide transport.	MFS transporter superfamily	12.0636	295.724	27.4655	XP_002100152.1
DS10_00004872	FBgn0040942	CG12643	n/a	Molecular function is unknown. Biological process is unknown.	n/a	12.0014	93.0616	12.6901	XP_001977253.1
DS10_00003537	FBgn0034194	CG15611	n/a	Molecular function: Rho guanyl-nucleotide exchange factor activity. Biological process: regulation of Rho protein signal transduction.	Dbl homology (DH) domain	11.9972	52.1203	8.89941	XP_002081868.1
DS10_00011072	FBgn0038730, FBgn0038731	CG6300, CG11659	n/a	Molecular function: long-chain fatty acid transporter activity. Biological process: metabolic process.	AMP-dependent synthetase-like superfamily	11.9661	8.29492	1.46541	XP_002102805.1
DS10_00008186	FBgn0030880	CG6788	n/a	Molecular function is unknown. Biological process: cell adhesion.	Fibrinogen, alpha/beta/gamma chain, C-terminal globular domain	11.9594	5.43099	0.198935	XP_002018900.1
DS10_00010918	FBgn0035868	CG7194	n/a	Molecular function is unknown. Biological process: gonad development.	Mab-21 domain	11.9484	40.9526	7.66638	XP_002093290.1
DS10_00002386	FBgn0033980	CG10245	Cyp6a20	Molecular function: electron carrier activity. Biological process: aggressive behavior.	Cytochrome P450 superfamily	11.8495	36.7138	7.30514	XP_004534603.2
DS10_00000006	FBgn0051976	CG31976	ovm	Molecular function is unknown. Biological process is unknown.	Protein of unknown function DUF1091	11.7714	5.52208	0.284149	XP_002087379.1
DS10_00010369	FBgn0038878	CG3301	n/a	Molecular function: oxidoreductase activity, acting on the CH-OH group of donors, NAD or NADP as acceptor. Biological process: metabolic process.	NAD(P)-binding domain superfamily	11.7364	3940.87	319.143	XP_002102603.1
DS10_00013302	FBgn0026418	CG6603	Hsc70Cb	Molecular function: chaperone binding. Biological process: protein folding.	ATPase, nucleotide binding domain/Heat shock protein 70kD, C-terminal domain superfamily	11.7	15.097	3.85819	XP_001980492.1
DS10_00001048	FBgn0010395	CG1762	Itgbn	Molecular function: cell adhesion molecule binding; receptor activity. Biological process: negative regulation of synaptic growth at neuromuscular junction; olfactory behavior; melanotic encapsulation of foreign target; muscle cell homeostasis; imaginal disc-derived wing morphogenesis.	EGF-like domain, extracellular	11.6555	6.38363	0.718685	NP_523608.2
DS10_00000691	FBgn0031601	CG3058	Dim1	Molecular function is unknown. Biological process: mitotic spindle organization; neurogenesis.	Dim1 family	11.6186	512.53	43.3104	NP_608830.3
DS10_00008043	FBgn0053301	CG33301	n/a	Molecular function: transferase activity, transferring phosphorus-containing groups. Biological process is unknown.	CHK kinase-like	11.6103	211.541	23.125	XP_002089021.1
DS10_00000133	FBgn0031571	CG3921	bark	Molecular function: carbohydrate binding. Biological process is unknown.	C-type lectin fold	11.5635	11.694	3.02268	NP_001245864.1
DS10_00006770	FBgn0033304	CG2397	Cyp6a13	Molecular function: electron carrier activity. Biological process: defense response to bacterium.	Cytochrome P450 superfamily	11.5574	101.641	14.0292	XP_001970448.1
DS10_00008658	FBgn0040256	CG6633	Ugt35C1	Molecular function: glucuronosyltransferase activity. Biological process: metabolic process.	UDP-glucuronosyl/UDP-glucosyltransferase	11.5149	90.3209	12.909	XP_002103915.1
DS10_00006755	FBgn0002570	CG8696	Mal-A1	Molecular function: alpha-glucosidase activity. Biological process: glucose metabolic process.	Glycoside hydrolase superfamily	11.478	17684.8	1025.3	XP_002080590.1
DS10_00005620	FBgn0050159	CG30159	n/a	Molecular function is unknown. Biological process is unknown.	Protein C3orf33-like	11.4446	260.243	26.5114	XP_002080364.1
DS10_00000899	FBgn0015663	CG2788	Ugt36A1	Molecular function: ecdysteroid UDP-glucosyltransferase activity. Biological process: metabolic process.	UDP-glucuronosyl/UDP-glucosyltransferase	11.4192	28.5276	6.48178	NP_524686.3
DS10_00001729	FBgn0012037	CG8827	Ance	Molecular function: peptidyl-dipeptidase activity. Biological process: spermatid nucleus differentiation; sperm individualization; metamorphosis; response to symbiotic bacterium; proteolysis.	Peptidase M2, peptidyl-dipeptidase A	11.4162	137.465	17.4471	XP_002035778.1
DS10_00000900	FBgn0002985	CG3851	odd	Molecular function: sequence-specific DNA binding transcription factor activity. Biological process: positive regulation of transcription from RNA polymerase II promoter; periodic partitioning by pair rule gene; negative regulation of transcription from RNA polymerase II promoter; imaginal disc-derived leg joint morphogenesis.	Zinc finger C2H2 superfamily	11.4085	8.17083	1.63727	XP_001968586.1
DS10_00010661	FBgn0036956	CG13813	n/a	Molecular function: transferase activity, transferring phosphorus-containing groups. Biological process is unknown.	CHK kinase-like	11.3791	8.41437	1.78888	XP_002085613.1
DS10_00000250	FBgn0031693	CG14032	Cyp4ac1	Molecular function: electron carrier activity. Biological process: insecticide catabolic process; hormone metabolic process.	Cytochrome P450 superfamily	11.3728	16.1366	4.30664	XP_002089235.1
DS10_00011471	FBgn0036752	CG5992	Adgf-A	Molecular function: growth factor activity; adenosine deaminase activity. Biological process: cell proliferation; hemocyte differentiation.	Adenosine/AMP deaminase domain	11.3667	14.4096	3.80858	XP_002085308.1
DS10_00004543	FBgn0004429	CG9116	LysP	Molecular function: lysozyme activity. Biological process: antimicrobial humoral response.	Glycoside hydrolase, family 22	11.3553	8563.3	538.815	XP_002093083.1
DS10_00007127	FBgn0051999	CG31999	n/a	Molecular function: calcium ion binding. Biological process: cell adhesion.	Complement Clr-like EGF domain	11.3324	11.4385	3.0531	XP_001982744.1
DS10_00004965	FBgn0030098	CG12057	n/a	Molecular function is unknown. Biological process is unknown.	Protein TsetseEP	11.3056	891.819	72.6007	XP_002101060.1
DS10_00009176	FBgn0039471	CG6295	n/a	BlastP against D. melanogaster AA	Triacylglycerol lipase family	11.181	790.923	63.2723	NP_651521.1
DS10_00003047	FBgn0035049	CG4859	Mmp1	Molecular function: metalloendopeptidase activity. Biological process: cellular component organization or biogenesis; cellular process; open tracheal system development; growth; programmed cell death; single-organism developmental process; extracellular structure organization; developmental growth; wound healing; molting cycle, chitin-based cuticle; gland morphogenesis; biological regulation; pos…	Hemopexin, conserved site	11.163	42.1062	8.23589	NP_726473.2
DS10_00011902	FBgn0038682	CG5835	n/a	Molecular function is unknown. Biological process is unknown.	n/a	11.1198	196.51	22.8682	XP_001979563.1
DS10_00011138	FBgn0263607	CG32155	l(3)72Dp	Molecular function: omega peptidase activity. Biological process: glutamine metabolic process.	Class I glutamine amidotransferase-like	11.119	59.543	10.1703	XP_001957220.1
DS10_00007222	FBgn0023001	CG8624	melt	Molecular function: phosphatidylinositol binding; phosphatidylinositol-5-phosphate binding. Biological process: insulin receptor signaling pathway; ectoderm development; sequestering of triglyceride; regulation of response to DNA damage stimulus; R8 cell fate specification; peripheral nervous system development.	PH-like domain superfamily, Armadillo-type fold	11.0921	7.92562	1.64632	XP_002093999.1
DS10_00010915	FBgn0035868	CG7194	n/a	Molecular function is unknown. Biological process: gonad development.	Mab-21 domain	11.0534	12.7119	3.52656	XP_002093290.1
DS10_00000984	FBgn0034429	CG18607	AANATL4	Molecular function: N-acetyltransferase activity. Biological process is unknown.	Acyl-CoA N-acyltransferase	11.0416	1741.92	152.946	XP_001974191.1
DS10_00012110	FBgn0015571	CG1257	α-Est3	Molecular function: carboxylesterase activity. Biological process is unknown.	Alpha/Beta hydrolase fold	10.984	35.7865	7.60288	XP_002102499.1
DS10_00003108	FBgn0034281	CG14490	n/a	Molecular function is unknown. Biological process is unknown.	MORN motif	10.9706	5.48405	0.498951	XP_001974589.1
DS10_00013344	FBgn0000659	CG10002	fkh	BlastP against D. melanogaster AA	fork head, FORK HEAD BOX TRANSCRIPTION FACTORS	10.9521	8.20591	1.86768	XP_002105233.1
DS10_00011387	FBgn0039329 + FBgn0039328 + FBgn0045761 + FBgn0039324 + FBgn0039323 + FBgn0039321 + FBgn0051098	CG10669 + CG10675 + CG10618 + CG10553 + CG10559 + CG10550 + CG31098	multiple genes	BlastP against D. melanogaster AA	C2H2 ZINC FINGER TRANSCRIPTION FACTORS + CHKov2 (CHK domain ov2) + CHKov1 (CHK domain ov1) +	10.9262	45.8685	8.87617	XP_001981805.1
DS10_00012101	FBgn0051473	CG31473	n/a	Molecular function: pyridoxamine-phosphate oxidase activity. Biological process: pyridoxine biosynthetic process.	FMN-binding split barrel	10.8407	10.4474	2.92833	XP_002102524.1
DS10_00003794	FBgn0035941	CG13313	n/a	Molecular function is unknown. Biological process is unknown.	CUB domain	10.7225	9.20547	2.44067	XP_002084198.1
DS10_00003686	FBgn0035833	CG7565	n/a	Molecular function: chitinase activity. Biological process is unknown.	Dyslexia-associated protein KIAA0319-like, PKD/Chitinase domain	10.7173	10.4155	2.97351	NP_648171.1
DS10_00006494	FBgn0030452	CG4330	MFS10	Molecular function: high affinity inorganic phosphate:sodium symporter activity. Biological process: transmembrane transport.	Major facilitator superfamily	10.7164	10.4556	2.98723	NP_572857.1
DS10_00005821	FBgn0034417	CG15117	n/a	Molecular function: beta-glucuronidase activity. Biological process: multicellular organism reproduction.	Beta-Galactosidase/glucuronidase domain superfamily	10.703	26.8145	6.63694	XP_002091824.1
DS10_00007504	FBgn0033340	CG13751	n/a	Molecular function is unknown. Biological process is unknown.	n/a	10.6605	5.74988	0.738507	XP_002032987.1
DS10_00004019	FBgn0052137	CG32137	n/a	Molecular function is unknown. Biological process: neuron projection morphogenesis.	n/a	10.6521	28.4213	6.89462	NP_729936.1
DS10_00004053	FBgn0087007	CG42230	bbg	BlastP against D. melanogaster AA	big bang, PDZ domain	10.647	55.9833	10.0887	XP_001972727.1
DS10_00005278	FBgn0027106	CG2977	Inx7	Molecular function: gap junction channel activity. Biological process: medium-term memory; imaginal disc-derived wing morphogenesis.	Innexin	10.5904	156.123	20.5749	XP_002043195.1
DS10_00009567	FBgn0038348	CG18519	AOX2	Molecular function: 2 iron, 2 sulfur cluster binding; iron ion binding; electron carrier activity; oxidoreductase activity, acting on CH-OH group of donors; flavin adenine dinucleotide binding. Biological process: oxidation-reduction process.	2Fe-2S ferredoxin, iron-sulphur binding site	10.5875	109.037	16.0372	XP_002097718.1
DS10_00012417	FBgn0085280	CG34251	n/a	Molecular function is unknown. Biological process is unknown.	n/a	10.5806	6.18635	1.0176	NP_001097634.1
DS10_00001155	FBgn0032665	CG15152	n/a	Molecular function is unknown. Biological process is unknown.	n/a	10.5691	347.577	35.0604	NP_609865.1
DS10_00013301	FBgn0001220	CG8542	Hsc70-5	Molecular function: unfolded protein binding. Biological process: protein folding.	ATPase, nucleotide binding domain, Heat shock protein 70 family	10.5605	7.99207	1.93771	XP_001980390.1
DS10_00006523	FBgn0286511	CG12110	Pld	Molecular function: phospholipase D activity. Biological process: Golgi organization; phototransduction; gastrulation involving germ band extension; cellularization; positive regulation of Golgi vesicle fusion to target membrane.	Phospholipase D	10.5483	45.2771	9.02619	XP_002080285.1
DS10_00010262	FBgn0038981	CG5346	n/a	Molecular function: oxidoreductase activity, acting on paired donors, with incorporation or reduction of molecular oxygen, 2-oxoglutarate as one donor, and incorporation of one atom each of oxygen into both donors. Biological process: oxidation-reduction process.	Isopenicillin N synthase-like	10.5358	18.8194	5.30871	XP_002098303.1
DS10_00000453	FBgn0051720	CG31720	mthl15	Molecular function: G-protein coupled receptor activity. Biological process: G-protein coupled receptor signaling pathway.	GPCR, family 2, secretin-like, GPCR, family 2-like	10.4776	5.96501	0.931547	XP_002089051.1
DS10_00013303	FBgn0026418	CG6603	Hsc70Cb	Molecular function: chaperone binding. Biological process: protein folding.	ATPase, nucleotide binding domain, Heat shock protein 70kD, C-terminal domain superfamily	10.4685	17.4592	5.01198	XP_001980492.1
DS10_00005695	FBgn0050491	CG30491	n/a	Molecular function: nucleotide binding; oxidoreductase activity. Biological process: metabolic process.	NAD(P)-binding domain superfamily	10.4606	39.1923	8.29786	XP_002080463.1
DS10_00013198	FBgn0051072	CG31072	Lerp	Molecular function: protein binding. Biological process: lysosomal transport; post-Golgi vesicle-mediated transport.	Cation-independent mannose-6-phosphate receptor repeat	10.4464	120.775	17.3372	NP_733169.2
DS10_00009419	FBgn0260463, FBgn0051352	CG31332, CG31352	Unc-115b, Unc-115a	Molecular function: actin binding. Biological process: axon guidance; photoreceptor cell axon guidance.	Zinc finger, LIM-type | Villin headpiece domain superfamily	10.4294	79.9902	12.9358	XP_002096989.1
DS10_00002260	FBgn0034999	CG3394	Fatp3	Molecular function: long-chain fatty acid transporter activity. Biological process: metabolic process.	AMP-dependent synthetase-like superfamily, AMP-binding, conserved site	10.3558	25.6405	6.6291	XP_001976580.1
DS10_00009755	FBgn0038790	CG5097	MtnC	Molecular function: metal ion binding. Biological process: response to metal ion.	Metallothionein, family 5, Diptera	10.286	4149.78	360.94	XP_001964490.1
DS10_00004868	FBgn0031116	CG1695	n/a	Molecular function: Rab GTPase activator activity. Biological process: regulation of Rab GTPase activity.	Rab-GTPase-TBC domain superfamily	10.2555	15.7023	4.70848	XP_001978614.1
DS10_00000256	FBgn0031689	CG10833	Cyp28d1	Molecular function: electron carrier activity. Biological process: oxidation-reduction process.	Cytochrome P450, conserved site, Cytochrome P450 superfamily	10.2323	48.6824	9.57091	XP_002089240.1
DS10_00004095	FBgn0036461	CG10006	Zip71B	Molecular function: metal ion transmembrane transporter activity. Biological process: transmembrane transport; metal ion transport.	Zinc/iron permease	10.208	14.6501	4.44068	XP_002084906.1
DS10_00002230	FBgn0034629	CG9709	Acox57D-d	Molecular function: acyl-CoA oxidase activity; palmitoyl-CoA oxidase activity. Biological process: fatty acid beta-oxidation.	Acyl-CoA dehydrogenase/oxidase, N-terminal and middle domain superfamily	10.2017	112.602	16.8546	XP_001975055.1
DS10_00007582	FBgn0037215	CG12582	β-Man	Molecular function: beta-mannosidase activity. Biological process: carbohydrate metabolic process.	Beta-Galactosidase/glucuronidase domain superfamily	10.1509	74.3636	12.6564	XP_002095907.1
DS10_00005707	FBgn0034365	CG5335	n/a	Molecular function: carbohydrate binding. Biological process is unknown.	Concanavalin A-like lectin/glucanase domain superfamily	10.1333	120.78	17.863	XP_002082121.1
DS10_00011970	FBgn0038348	CG18519	AOX2	Molecular function: 2 iron, 2 sulfur cluster binding; iron ion binding; electron carrier activity; oxidoreductase activity, acting on CH-OH group of donors; flavin adenine dinucleotide binding. Biological process: oxidation-reduction process.	2Fe-2S ferredoxin, iron-sulphur binding site, Aldehyde oxidase/xanthine dehydrogenase, molybdopterin binding domain superfamily	10.1076	18.7342	5.53067	NP_524337.1
DS10_00003287	FBgn0050463	CG30463	Pgant9	Molecular function: polypeptide N-acetylgalactosaminyltransferase activity. Biological process is unknown.	Glycosyltransferase 2-like, Ricin B-like lectins	10.0143	34.058	7.90813	NP_725603.2
DS10_00002509	FBgn0085408	CG34379	Shrm	Molecular function: actin binding. Biological process: cell morphogenesis.	Apx/Shrm Domain 2	9.94308	43.2656	9.1711	NP_610952.1
DS10_00003841	FBgn0001224	CG4463	Hsp23	Molecular function: protein binding. Biological process: response to hypoxia; cold acclimation.	Alpha crystallin/Hsp20 domain, Alpha crystallin/Small heat shock protein, animal type	9.92198	3.94852	0.049895	NP_523999.1
DS10_00004693	FBgn0027343	CG16785	fz3	Molecular function: transmembrane signaling receptor activity; Wnt-protein binding. Biological process: establishment or maintenance of cell polarity.	Frizzled/secreted frizzled-related protein, GPCR, family 2-like	9.88725	9.65948	3.1287	XP_002099711.1
DS10_00002122	FBgn0033065	CG8345	Cyp6w1	Molecular function: electron carrier activity. Biological process: oxidation-reduction process.	Cytochrome P450, conserved site, Cytochrome P450 superfamily	9.88363	7.63052	2.09686	NP_611698.1
DS10_00001018	FBgn0032805	CG10337	n/a	Molecular function is unknown. Biological process is unknown.	Cytochrome b561/ferric reductase transmembrane	9.82848	15.6405	4.89887	XP_002079952.1
DS10_00013077	FBgn0259236	CG42334	comm3	Molecular function is unknown. Biological process: autophagic cell death; salivary gland cell autophagic cell death.	Commissureless	9.76865	14.0771	4.49857	XP_002084987.1
DS10_00012259	FBgn0026418	CG6603	Hsc70Cb	Molecular function: chaperone binding. Biological process: protein folding.	ATPase, nucleotide binding domain, Heat shock protein 70kD, peptide binding domain superfamily	9.75759	7.06855	1.8991	XP_001980492.1
DS10_00005265	FBgn0029909	CG12796	mAChR-C	Molecular function: G-protein coupled receptor activity; G-protein coupled amine receptor activity. Biological process: G-protein coupled receptor signaling pathway.	GPCR, rhodopsin-like, 7TM	9.74092	4.64656	0.487868	XP_002106337.1
DS10_00013527	FBgn0020506	CG8221	Amyrel	Molecular function: oligo-1,6-glucosidase activity; alpha-amylase activity. Biological process: carbohydrate metabolic process.	Glycoside hydrolase superfamily, Alpha amylase	9.71458	4603.39	423.423	BAA95443.1
DS10_00003289	FBgn0027558	CG4445	Pgant3	Molecular function: polypeptide N-acetylgalactosaminyltransferase activity; acetylgalactosaminyltransferase activity; transferase activity, transferring glycosyl groups. Biological process: protein O-linked glycosylation; cell-substrate adhesion; oligosaccharide biosynthetic process; regulation of cell adhesion mediated by integrin; O-glycan processing; extracellular matrix constituent secretion.	Glycosyltransferase, 2-likeNucleotide-diphospho-sugar transferases, Ricin B, lectin domain	9.69118	43.6496	9.3509	NP_725603.2
DS10_00001483	FBgn0031887	CG11289	Ugt307A1	Molecular function: glucuronosyltransferase activity. Biological process: metabolic process.	UDP-glucuronosyl/UDP-glucosyltransferase	9.66388	4.28637	0.318901	XP_002078474.1
DS10_00008934	FBgn0036756	CG5582	Cln3	Molecular function is unknown. Biological process: regulation of JNK cascade; determination of adult lifespan; response to oxidative stress; regulation of Notch signaling pathway.	Batten's disease protein Cln3, MFS transporter superfamily	9.61258	78.8773	13.7362	NP_649011.1
DS10_00009963	FBgn0015011	CG8956	AhcyL2	Molecular function: adenosylhomocysteinase activity. Biological process: one-carbon metabolic process.	Adenosylhomocysteinase-like superfamily	9.61201	25.2571	6.98502	NP_996222.1
DS10_00007450	FBgn0063649	CG6006	n/a	Molecular function: carnitine transmembrane transporter activity. Biological process: transmembrane transport.	Major facilitator superfamily domain, Sugar transporter, conserved site	9.6044	7.86827	2.3801	NP_001097812.1
DS10_00001735	FBgn0028939	CG18146	NimC2	Molecular function is unknown. Biological process: phagocytosis.	Cysteine rich repeat, tripleX, EGF-like domain	9.58756	42.2973	9.28067	XP_002035792.1
DS10_00005013	FBgn0003390	CG3135	shf	Molecular function: protein binding. Biological process: synaptic target recognition; smoothened signaling pathway; regulation of smoothened signaling pathway; protein stabilization; positive regulation of smoothened signaling pathway; Wnt receptor signaling pathway.	WIF domain superfamily, EGF-like domain	9.56912	24.481	6.8536	NP_572349.1
DS10_00012834	FBgn0037850	CG14695	n/a	Molecular function is unknown. Biological process is unknown.	Thioredoxin-like superfamily	9.50403	6.7253	1.83697	XP_002103927.1
DS10_00012429	FBgn0259236	CG42334	comm3	Molecular function is unknown. Biological process: autophagic cell death; salivary gland cell autophagic cell death.	Commissureless	9.41334	14.9007	4.92128	XP_002084987.1
DS10_00013325	FBgn0263241	CG33048	Mocs1	Molecular function: 4 iron, 4 sulfur cluster binding; metal ion binding; catalytic activity. Biological process: Mo-molybdopterin cofactor biosynthetic process.	Aldolase-type TIM barrel, Molybdenum cofactor biosynthesis C	9.40107	68.7066	12.8383	NP_788494.1
DS10_00001989	FBgn0032405	CG14946	firl	Molecular function: oxidoreductase activity. Biological process: metabolic process.	NAD(P)-binding domain superfamily, Short-chain dehydrogenase/reductase, conserved site	9.40077	15.3993	5.06275	NP_001033900.2
DS10_00011637	FBgn0262516	CG8743	Trpml	Molecular function: calcium channel activity. Biological process: cellular calcium ion homeostasis; positive regulation of TOR signaling cascade; autophagic vacuole fusion; lateral inhibition; negative regulation of growth of symbiont in host; autophagy.	Mucolipin, Polycystin cation channel, PKD1/PKD2	9.39545	35.6087	8.52597	XP_002043608.1
DS10_00007223	FBgn0259173	CG42278	corn	Molecular function: protein binding; microtubule binding. Biological process: positive regulation of exocytosis.	n/a	9.38135	6.40443	1.71699	NP_729220.2
DS10_00000135	FBgn0004893	CG10021	bowl	Molecular function: sequence-specific DNA binding RNA polymerase II transcription factor activity. Biological process: terminal region determination; wing disc development; embryonic hindgut morphogenesis; hindgut morphogenesis; lateral inhibition; imaginal disc-derived leg morphogenesis; embryonic foregut morphogenesis; imaginal disc-derived leg joint morphogenesis.	Zinc finger C2H2 superfamily	9.32647	14.9607	4.99161	XP_001968618.1
DS10_00012811	FBgn0038348	CG18519	AOX2	Molecular function: 2 iron, 2 sulfur cluster binding; iron ion binding; electron carrier activity; oxidoreductase activity, acting on CH-OH group of donors; flavin adenine dinucleotide binding. Biological process: oxidation-reduction process.	2Fe-2S ferredoxin, iron-sulphur binding site, Aldehyde oxidase/xanthine dehydrogenase, molybdopterin binding domain superfamily	9.30464	11.9708	4.1958	AAQ17531.1
DS10_00012853	FBgn0053258	CG33258	Dmel\CG33258	Molecular function: chitin binding. Biological process: chitin metabolic process.	Chitin binding domain	9.27381	14.3319	4.85577	XP_002085050.1
DS10_00010390	FBgn0263316	CG14709	Mrp4	Molecular function: ATPase activity, coupled to transmembrane movement of substances; organic anion transmembrane transporter activity. Biological process: response to hypoxia; response to anoxia; wing disc dorsal/ventral pattern formation.	ABC transporter type 1, transmembrane domain, AAA+ ATPase domain	9.23203	6.1664	1.64373	NP_650086.2
DS10_00001616	FBgn0265001	CG44152	ppk18	Molecular function: sodium channel activity. Biological process: sodium ion transport.	Epithelial sodium channel	9.22483	3.70776	0.101146	NP_609308.3
DS10_00005621	FBgn0029507	CG12846	Tsp42Ed	Molecular function is unknown. Biological process is unknown.	Tetraspanin, EC2 domain superfamily	9.22419	1044.42	104.589	NP_523630.1
DS10_00004616	FBgn0035101	CG1212	p130CAS	Molecular function is unknown. Biological process: axonal defasciculation; cell-cell adhesion; maintenance of cell polarity.	CAS, serine rich four helix bundle domain superfamily	9.18455	19.7791	6.16837	XP_002034743.1
DS10_00002385	FBgn0033981	CG10247	Cyp6a21	Molecular function: electron carrier activity. Biological process: oxidation-reduction process.	Cytochrome P450, conserved site, Cytochrome P450 superfamily	9.17639	25.8264	7.31944	XP_011206220.1
DS10_00002643	FBgn0053503	CG33503	Cyp12d1-d	Molecular function: electron carrier activity. Biological process: response to insecticide; response to DDT.	Cytochrome P450, conserved site, Cytochrome P450 superfamily	9.15594	62.338	12.2872	XP_002090338.1
DS10_00005428	FBgn0003053	CG12212	peb	Molecular function: sequence-specific DNA binding transcription factor activity. Biological process: single-organism developmental process; biological regulation; system development; sensory organ development; embryonic development via the syncytial blastoderm; open tracheal system development; embryo development ending in birth or egg hatching; establishment of planar polarity; cellular componen…	Zinc finger C2H2 superfamily	9.14169	7.84063	2.65467	XP_002036999.1
DS10_00004713	FBgn0040364	CG11378	n/a	Molecular function is unknown. Biological process is unknown.	Protein of unknown function DUF1397	9.10985	222.945	29.0093	XP_002105885.1
DS10_00009949	FBgn0039052	CG6733	n/a	Molecular function: aminoacylase activity. Biological process: cellular amino acid metabolic process.	Bacterial exopeptidase dimerisation domain	9.06026	29.2911	7.87387	XP_011208569.1
DS10_00011006	FBgn0263316	CG14709	Mrp4	Molecular function: ATPase activity, coupled to transmembrane movement of substances; organic anion transmembrane transporter activity. Biological process: response to hypoxia; response to anoxia; wing disc dorsal/ventral pattern formation.	ABC transporter type 1, transmembrane domain, AAA+ ATPase domain	9.03771	7.89803	2.76969	NP_650086.2
DS10_00011461	FBgn0014380	CG9366	RhoL	Molecular function: GTPase activity. Biological process: regulation of cell shape; border follicle cell migration; response to DNA damage stimulus; cell adhesion; melanotic encapsulation of foreign target; mesoderm development.	P-loop containing nucleoside triphosphate hydrolase	8.99509	82.807	15.1298	XP_002096947.1
DS10_00013217	FBgn0039137	CG13604	n/a	Molecular function is unknown. Biological process is unknown.	Histidine phosphatase superfamily, SH3-like domain superfamily	8.97489	22.7022	6.87528	XP_002032427.1
DS10_00001618	FBgn0065108	CG34059	ppk16	Molecular function: sodium channel activity. Biological process: sodium ion transport.	Epithelial sodium channel, conserved site	8.87647	3.57187	0.128638	XP_002088972.1
DS10_00008284	FBgn0025456	CG5413	CREG	Molecular function: transcription factor binding. Biological process: negative regulation of transcription from RNA polymerase II promoter.	Cellular repressor of E1A-stimulated genes (CREG), FMN-binding split barrel	8.84626	702.411	69.8817	XP_001979771.1
DS10_00002248	FBgn0034639	CG15673	n/a	Molecular function is unknown. Biological process is unknown.	n/a	8.77761	12.345	4.5702	AAY55097.2
DS10_00013361	FBgn0023000	CG6936	mth	Molecular function: protein binding; G-protein coupled receptor activity. Biological process: determination of adult lifespan; G-protein coupled receptor signaling pathway; response to stress; synaptic vesicle exocytosis.	GPCR, family 2, secretin-like, Methuselah, N-terminal domain superfamily	8.75107	18.5534	6.15037	NP_728521.1
DS10_00001275	FBgn0030050	CG12111	n/a	BlastP against D. melanogaster AA	C-type lectin fold	8.74455	60.2382	12.5007	XP_002079910.1
DS10_00011774	FBgn0053099	CG33099		Molecular function: gibberellin 20-oxidase activity. Biological process: oxidation-reduction process.	Isopenicillin N synthase-like, Non-haem dioxygenase N-terminal domain	8.73549	21.4256	6.76258	XP_002032215.1
DS10_00001158	FBgn0041184	CG15154	Socs36E	Molecular function is unknown. Biological process: notum morphogenesis; germ-line stem cell maintenance; negative regulation of sevenless signaling pathway; negative regulation of JAK-STAT cascade; negative regulation of epidermal growth factor receptor signaling pathway; haltere development; compound eye pigmentation; imaginal disc-derived wing vein morphogenesis; negative regulation of R7 cell …	SOCS box-like domain superfamily	8.67596	6.94802	2.46047	XP_002090554.1
DS10_00008650	FBgn0026314	CG6649	Ugt35B1	Molecular function: glucuronosyltransferase activity. Biological process: metabolic process.	UDP-glycosyltransferase family, conserved site	8.6736	49.4796	10.9867	XP_001954436.1
DS10_00003620	FBgn0004919	CG2679	gol	Molecular function: zinc ion binding. Biological process: regulation of transcription, DNA-dependent; mesoderm development.	PA domain, Zinc finger, RING/FYVE/PHD-type	8.59702	8.52933	3.37065	XP_002018318.1
DS10_00003138	FBgn0034093	CG15706	n/a	Molecular function is unknown. Biological process is unknown.	Major facilitator superfamily associated domain, MFS transporter superfamily	8.56015	10.0975	3.94561	XP_001975397.1
DS10_00004343	FBgn0036993	CG5910	n/a	Molecular function is unknown. Biological process is unknown.	n/a	8.51899	37.1251	9.371	XP_002095454.1
DS10_00007280	FBgn0015773	CG18657	NetA	Molecular function is unknown. Biological process: motor neuron axon guidance; axon guidance; glial cell migration; regulation of photoreceptor cell axon guidance; dendrite guidance.	Laminin, N-terminal domain superfamily, Netrin domain	8.51866	5.46953	1.57704	XP_002106935.1
DS10_00000991	FBgn0263873	CG43720	sick	BlastP against D. melanogaster AA	sickie, OTHER DNA HELICASES	8.48432	8.62711	3.46926	XP_002039170.1
DS10_00001712	FBgn0027844	CG7820	CAH1	Molecular function: carbonate dehydratase activity. Biological process: one-carbon metabolic process.	Alpha carbonic anhydrase domain superfamily	8.46157	513.822	56.7289	XP_002088638.1
DS10_00009333	FBgn0037485	CG14606	n/a	Molecular function: hexose transmembrane transporter activity. Biological process: phagocytosis, engulfment.	Major facilitator superfamily domain, MFS transporter superfamily	8.44811	4.96107	1.26214	XP_002102458.1
DS10_00005474	FBgn0034487	CG11048	Efhc1.2	Molecular function is unknown. Biological process: cilium assembly.	EF-hand domain-containing protein EFHC1/EFHC2/EFHB, Domain of unknown function DUF1126	8.44694	6.1658	2.10786	BAD72896.1
DS10_00005803	FBgn0034406	CG15106	Jheh3	Molecular function: epoxide hydrolase activity. Biological process: juvenile hormone catabolic process.	Alpha/Beta hydrolase fold, Epoxide hydrolase-like	8.44524	430.83	49.5026	ACV04617.1
DS10_00007221	FBgn0010387	CG8627	Acbp2	Molecular function: diazepam binding; enzyme inhibitor activity; fatty-acyl-CoA binding. Biological process: cellular acyl-CoA homeostasis.	Acyl-CoA-binding protein, ACBP	8.44474	2175.78	258.546	ACE82579.1
DS10_00010715	FBgn0266417	CG45057	ringer	Molecular function is unknown. Biological process: neuron projection morphogenesis.	ringmaker, EF-hand domain pair	8.42774	104.384	18.8776	XP_001973251.1
DS10_00010932	FBgn0037090	CG7529	Est-Q	Molecular function: carboxylesterase activity. Biological process is unknown.	Alpha/Beta hydrolase fold, Carboxylesterase, type B	8.41857	6.16133	2.1208	NP_649321.1
DS10_00003656	FBgn0035611	CG13285	n/a	Molecular function is unknown. Biological process is unknown.	n/a	8.41516	6.13617	2.10212	XP_002035445.1
DS10_00011553	FBgn0036195	CG6053	Dnai2	Molecular function: ATPase activity, coupled; motor activity. Biological process: sensory perception of sound.	WD40/YVTN repeat-like-containing domain superfamily	8.36636	5.9217	1.97629	AAY55180.1
DS10_00011889	FBgn0014930	CG2846	n/a	Molecular function: riboflavin kinase activity. Biological process: riboflavin biosynthetic process.	Riboflavin kinase domain superfamily	8.34673	16.436	5.93705	NP_649749.2
DS10_00002208	FBgn0034602	CG15658	Lapsyn	Molecular function is unknown. Biological process: nervous system development.	Leucine-rich repeat domain superfamily	8.32394	17.3183	6.10723	XP_002082446.1
DS10_00009254	FBgn0051133	CG31133	Slimp	Molecular function: tRNA binding. Biological process: cellular respiration; mitochondrion morphogenesis.	Class I and II aminoacyl-tRNA synthetase, tRNA-binding arm, Serine-tRNA synthetase, type1, N-terminal domain superfamily	8.3039	16.4705	5.96465	XP_002104667.1
DS10_00013414	n/a	n/a	n/a	BlastP against D. melanogaster AA	n/a	8.30354	5.21764	1.5487
DS10_00005929	FBgn0030662	CG9220	Chsy	Molecular function: glucuronosyltransferase activity; acetylglucosaminyltransferase activity. Biological process: chondroitin sulfate biosynthetic process.	Chondroitin N-acetylgalactosaminyltransferase, Nucleotide-diphospho-sugar transferases	8.28553	6.21879	2.27173	XP_002100687.1
DS10_00000057	FBgn0005660	CG2914	Ets21C	Molecular function: sequence-specific DNA binding transcription factor activity. Biological process: dendrite morphogenesis; defense response to bacterium.	Ets domain, Winged helix DNA-binding domain superfamily	8.2668	4.06942	0.707719	XP_002087441.1
DS10_00008528	FBgn0039736	CG7912	n/a	Molecular function: high affinity sulfate transmembrane transporter activity. Biological process: sulfate transport.	SLC26A/SulP transporter	8.25587	4.67601	1.16544	XP_002099330.1
DS10_00013551	FBgn0000659	CG10002	fkh	Molecular function: sequence-specific DNA binding transcription factor activity; sequence-specific DNA binding; transcription regulatory region sequence-specific DNA binding. Biological process: negative regulation of programmed cell death; Malpighian tubule morphogenesis; positive regulation of transcription from RNA polymerase II promoter; negative regulation of apoptotic process; salivary glan…	Fork-head N-terminal, Winged helix DNA-binding domain superfamily	8.20892	7.84128	3.24893	AAQ22498.1
DS10_00011202	FBgn0066101	CG31094	LpR1	Molecular function: receptor activity. Biological process: receptor-mediated endocytosis.	EGF-type aspartate/asparagine hydroxylation site, EGF-like calcium-binding, conserved site	8.19651	27.3747	8.2245	NP_001097931.3
DS10_00006630	FBgn0033778	CG3790	Balat	Molecular function: carnitine transmembrane transporter activity. Biological process: transmembrane transport.	Major facilitator, sugar transporter-like	8.19324	5.17722	1.582	XP_001975844.1
DS10_00008963	FBgn0004514	CG7485	Oct-TyrR	Molecular function: G-protein coupled amine receptor activity. Biological process: octopamine or tyramine signaling pathway; sensory perception of smell.	Octopamine-Tyramine receptor, GPCR, rhodopsin-like, 7TM	8.14603	4.11876	0.814013	XP_001982051.1
DS10_00005610	FBgn0033110	CG9447	n/a	Molecular function: transferase activity, transferring acyl groups other than amino-acyl groups. Biological process is unknown.	Acyltransferase 3	8.11495	24.7977	7.79242	XP_002080344.1
DS10_00004825	FBgn0031170	CG1718	ABCA	Molecular function: ATPase activity, coupled to transmembrane movement of substances; transporter activity. Biological process is unknown.	ATP binding cassette subfamily A	8.1071	44.3857	10.8367	XP_002039623.1
DS10_00012121	FBgn0002732	CG8337	E(spl)mα-BFM	Molecular function is unknown. Biological process: sensory organ development; Notch signaling pathway; cell fate specification.	Enhancer of split mα, Bearded family member	8.08187	4.69078	1.27654	NP_524506.1
DS10_00005531	FBgn0034031	CG12963	n/a	BlastP against D. melanogaster AA	n/a	8.07557	3.31312	0.196051	XP_002092349.1
DS10_00009634	FBgn0040551	CG11686	n/a	Molecular function is unknown. Biological process is unknown.	n/a	8.0676	100.89	19.0828	XP_001980302.1
DS10_00012411	FBgn0026565	CG1315	Ass	Molecular function: argininosuccinate synthase activity. Biological process: argininosuccinate metabolic process.	Argininosuccinate synthase	8.06168	129.037	22.6707	XP_002096752.1
DS10_00002444	FBgn0033649	CG13194	pyr	Molecular function: fibroblast growth factor receptor binding. Biological process: single-organism developmental process; system development; cardiovascular system development; localization; cellular component movement; multicellular organismal development; biological regulation; anatomical structure formation involved in morphogenesis; positive regulation of cell proliferation; mesoderm morphoge…	pyramus, FIBROBLAST GROWTH FACTORS, Cytokine IL1/FGF	8.05472	8.71424	3.72666	AAS90558.2
DS10_00002079	FBgn0034718	CG3413	wdp	Molecular function is unknown. Biological process: synaptic target recognition; trachea development.	windpipe, Leucine-rich repeat	8.05129	123.856	21.8851	XP_002092403.1
DS10_00000240	FBgn0031703	CG12512	n/a	Molecular function: long-chain fatty acid-CoA ligase activity. Biological process: metabolic process.	ACYL-COA SYNTHETASES, AMP-binding, conserved site	7.97824	55.7761	12.865	XP_002089222.1
DS10_00009643	FBgn0038135	CG8773	n/a	Molecular function: aminopeptidase activity. Biological process: dsRNA transport.	M1 METALLOPEPTIDASES, Aminopeptidase N-like , N-terminal	7.90905	175.943	28.3492	XP_001990086.1
DS10_00005078	FBgn0030847	CG12991	n/a	Molecular function is unknown. Biological process is unknown.	n/a	7.87165	16.978	6.33023	NP_001259648.1
DS10_00011996	FBgn0038804	CG10877	n/a	Molecular function: catalytic activity. Biological process: metabolic process.	OTHER SULFUR-CONTAINING GROUP TRANSFERASES, CoA-transferase family III	7.85379	6.67429	2.87121	XP_002096429.1
DS10_00012281	FBgn0025620	CG13360	n/a	Molecular function: transferase activity, transferring phosphorus-containing groups. Biological process is unknown.	ECDYSTEROID KINASE-LIKE	7.83923	105.128	20.0265	XP_002099713.1
DS10_00012925	FBgn0040805	CG12355	n/a	Molecular function is unknown. Biological process is unknown.	Mpv17/PMP22	7.82377	46.4351	11.5728	XP_002086456.1
DS10_00003458	FBgn0259709	CG42363	n/a	BlastP against D. melanogaster AA	4 similar genes merged	7.79695	10.2289	4.49694	NP_001137730.1
DS10_00010967	n/a	n/a	n/a	n/a	n/a	7.79448	4.95717	1.65283	XP_011194655.1
DS10_00003898	FBgn0259163	CG42268	n/a	Molecular function is unknown. Biological process: imaginal disc-derived wing morphogenesis.	n/a	7.78037	8.12451	3.64121	NP_001261648.1
DS10_00004712	FBgn0085349	CR34320	CR34320	Molecular function is unknown. Biological process is unknown.	pseudogene_attribute	7.76711	5.40537	1.99506	XP_002040314.1
DS10_00009566	FBgn0264776	CG44014	n/a	Molecular function is unknown. Biological process is unknown.	Calycin	7.74912	192.203	30.7064	XP_001980073.1
DS10_00000027	FBgn0025686	CG11592	Amnionless	Molecular function is unknown. Biological process: lateral inhibition.	Amnionless	7.7371	75.4694	16.1591	XP_002045153.1
DS10_00006058	FBgn0024980	CG2715	Syx4	Molecular function: SNAP receptor activity. Biological process: inter-male aggressive behavior.	Syntaxin 4, Qa-SNAREs	7.72804	69.3304	15.3399	XP_001976753.1
DS10_00003335	FBgn0015037	CG10842	Cyp4p1	Molecular function: electron carrier activity. Biological process: oxidation-reduction process.	Cytochrome P450 superfamily	7.72209	13.9546	5.72302	XP_002089769.1
DS10_00008202	FBgn0029824	CG3726	n/a	Molecular function: DNA binding. Biological process is unknown.	PIPSQUEAK TRANSCRIPTION FACTORS, SKP1/BTB/POZ domain superfamily	7.66662	10.0442	4.50855	NP_001284917.1
DS10_00001016	FBgn0032809	CG13078	n/a	Molecular function is unknown. Biological process is unknown.	Cytochrome b561/ferric reductase transmembrane	7.66073	11.888	5.13211	XP_001974229.1
DS10_00002556	FBgn0020269	CG10145	mspo	Molecular function is unknown. Biological process is unknown.	M-spondin, Spondin, N-terminal	7.61358	10.7035	4.82298	XP_001975600.1
DS10_00009396	FBgn0038829	CG17271	n/a	Molecular function: calcium ion binding. Biological process is unknown.	EF-Hand 1, calcium-binding site	7.60944	132.128	24.1243	NP_001036734.1
DS10_00006644	FBgn0261545	CG42663	n/a	Molecular function is unknown. Biological process: determination of adult lifespan.	Nck-associated protein 5-like	7.5822	14.7448	5.9879	XP_002091003.1
DS10_00003392	FBgn0033448	CG1623	hebe	Molecular function is unknown. Biological process: determination of adult lifespan.	n/a	7.57502	251.987	37.27	XP_001969148.1
DS10_00012340	FBgn0025620	CG13360	n/a	Molecular function: transferase activity, transferring phosphorus-containing groups. Biological process is unknown.	ECDYSTEROID KINASE-LIKE	7.55391	103.533	20.396	AAQ09887.1
DS10_00007837	FBgn0261565	CG42679	Lmpt	BlastP against D. melanogaster AA	Limpet, Four and a half LIM domains protein 2/3/5	7.54837	8.79502	4.11566	XP_002030839.1
DS10_00004521	FBgn0010246	CG9155	Myo61F	Molecular function: ATPase activity, coupled. Biological process: determination of left/right symmetry; imaginal disc-derived male genitalia morphogenesis; defense response to bacterium; microvillus organization; mesoderm development.	Myosin 61F, MYOSIN MOTORS	7.53649	397.548	52.4562	XP_002093109.1
DS10_00007267	FBgn0015033	CG4321	Cyp4d8	Molecular function: electron carrier activity. Biological process: oxidation-reduction process.	Cytochrome P450 superfamily	7.53563	5.12259	1.96201	XP_002083995.1
DS10_00009191	FBgn0039486	CG6074	CAH9	Molecular function: carbonate dehydratase activity. Biological process: one-carbon metabolic process.	Carbonic anhydrase 9, Alpha carbonic anhydrase domain	7.52828	52.262	12.9879	XP_002098834.1
DS10_00004386	FBgn0266696	CG45186	Svil	Molecular function: actin binding. Biological process: cytoskeleton organization.	Supervillin, ADF-H/Gelsolin-like domain superfamily	7.49841	44.8818	11.6936	NP_001261329.1
DS10_00003042	FBgn0035044	CG3663	n/a	Molecular function: catalytic activity. Biological process: metabolic process.	Isochorismatase-like	7.48483	26.777	8.69206	NP_611952.1
DS10_00006828	FBgn0029848	CG3599	Btnd	Molecular function: hydrolase activity, acting on carbon-nitrogen (but not peptide) bonds, in linear amides. Biological process: response to heat; histone biotinylation; peptidyl-lysine biotinylation.	Biotinidase, OTHER CARBON-NITROGEN HYDROLASES OF LINEAR AMIDES	7.48409	4.02489	1.06456	XP_002099874.1
DS10_00005898	FBgn0030695	CG8995	PGRP-LE	Molecular function: protein binding. Biological process: immune response; response to bacterium; determination of adult lifespan; defense response to Gram-positive bacterium; positive regulation of innate immune response; defense response to bacterium.	Peptidoglycan recognition protein LE, LONG PEPTIDOGLYCAN RECOGNITION PROTEINS	7.47914	35.6164	10.1565	XP_002076726.1
DS10_00005003	FBgn0030073	CG10962	n/a	Molecular function: oxidoreductase activity, acting on the CH-OH group of donors, NAD or NADP as acceptor. Biological process: metabolic process.	STEROID DEHYDROGENASES, NAD(P)-binding domain superfamily	7.45475	112.923	22.0149	XP_002106504.1
DS10_00000741	FBgn0053126	CG33126	Nlaz	Molecular function: lipid binding. Biological process: triglyceride homeostasis; determination of adult lifespan; response to oxidative stress; multicellular organism reproduction; carbohydrate homeostasis.	Neural Lazarillo, Calycin, Lipocalin/cytosolic fatty-acid binding domain	7.39369	407.072	53.8571	XP_002077751.1
DS10_00011476	FBgn0036742	CG7497	n/a	Molecular function: G-protein coupled receptor activity. Biological process: regulation of cell shape; actin filament organization.	GPCR, rhodopsin-like, 7TM	7.37669	5.41811	2.30252	XP_002094986.1
DS10_00002714	FBgn0034553	CG9993	n/a	Molecular function: 4-coumarate-CoA ligase activity. Biological process: metabolic process.	ACYL-COA SYNTHETASES, AMP-binding enzyme, C-terminal domain	7.32782	7.33701	3.56886	XP_001974965.1
DS10_00009744	FBgn0038143	CG9813	n/a	Molecular function is unknown. Biological process is unknown.	n/a	7.32362	107.44	21.501	XP_002031341.1
DS10_00008116	FBgn0035625	CG5249	Blimp-1	Molecular function: RNA polymerase II core promoter proximal region sequence-specific DNA binding transcription factor activity involved in negative regulation of transcription. Biological process: regulation of tube architecture, open tracheal system; negative regulation of transcription from RNA polymerase II promoter; cellular response to ecdysone.	C2H2 ZINC FINGER TRANSCRIPTION FACTORS	7.28239	9.02735	4.39654	XP_002093816.1
DS10_00007743	FBgn0037781	CG12812	Fancl	Molecular function: ubiquitin-protein ligase activity. Biological process: DNA repair; protein monoubiquitination.	E3 ubiquitin-protein ligase FANCL	7.27932	35.4613	10.3139	NP_649974.1
DS10_00007904	FBgn0035392	CG1271	n/a	Molecular function is unknown. Biological process: carbohydrate metabolic process.	ATPase, PSEUDO-GLYCEROL KINASE, ATPase, nucleotide binding domain	7.25724	5.38374	2.36242	NP_647763.1
DS10_00001075	FBgn0031717	CG6957	Oscillin	Molecular function: glucosamine-6-phosphate deaminase activity. Biological process: carbohydrate metabolic process; N-acetylglucosamine metabolic process.	Glucosamine-6-phosphate isomerase	7.24125	54.3178	13.7801	NP_001245895.1
DS10_00011745	FBgn0038750	CG4465	n/a	Molecular function: secondary active organic cation transmembrane transporter activity. Biological process: transmembrane transport.	Major facilitator superfamily	7.23183	3.71308	0.947478	XP_002102778.1
DS10_00000395	FBgn0032006	CG8222	Pvr	Molecular function: protein binding. Biological process: single-organism developmental process; cellular component organization or biogenesis; localization; biological regulation; cellular component movement; regulation of developmental process; actin filament-based process; renal tubule development; organelle organization; response to DNA damage stimulus; immune response; gland morphogenesis; ve…	PDGF- and VEGF-receptor related, RECEPTOR TYROSINE KINASES	7.22337	22.0351	7.925	NP_001260234.1
DS10_00001216	FBgn0032715	CG17597	n/a	Molecular function: acetyl-CoA C-acyltransferase activity. Biological process: metabolic process.	Thiolase, OTHER NON-AMINO-ACYL ACYL GROUP TRANSFERASES	7.2099	155.599	28.4707	XP_002090618.1
DS10_00002508	FBgn0085408	CG34379	Shrm	BlastP against D. melanogaster AA	Shroom, Apx/Shrm Domain 2	7.20267	5.26996	2.33379	XP_002091294.1
DS10_00001189	FBgn0051789	CG31789	n/a	Molecular function is unknown. Biological process is unknown.	Transcription activator MBF2	7.19245	96.0156	20.2739	XP_002079800.1
DS10_00002143	FBgn0086408	CG3622	stl	Molecular function: metalloendopeptidase activity; zinc ion binding. Biological process: ovarian follicle development; ovarian follicle cell stalk formation; oogenesis.	stall, ADAM cysteine-rich domain 2	7.14708	5.50104	2.53063	NP_001097423.1
DS10_00002924	FBgn0034808	CG9896	n/a	Molecular function is unknown. Biological process is unknown.	n/a	7.13801	57.9088	14.6105	XP_002040009.1
DS10_00004591	FBgn0035146	CG13893	n/a	Molecular function: transporter activity. Biological process: transport.	CRAL/TRIO, N-terminal domain	7.13055	41.5621	11.5869	NP_612042.3
DS10_00006130	FBgn0052529	CG32529	Hers	Molecular function: transcription regulatory region sequence-specific DNA binding. Biological process: imaginal disc-derived wing morphogenesis; chromatin silencing; chromatin remodeling.	Histone gene-specific Epigenetic Repressor in late S phase,Bromo adjacent homology (BAH) domain	7.12024	10.8426	5.20016	XP_001977837.1
DS10_00012845	FBgn0036768	CG7402	n/a	Molecular function: N-acetylgalactosamine-4-sulfatase activity. Biological process: metabolic process.	Alkaline-phosphatase-like, core domain superfamily	7.09423	3.51398	0.828025	XP_002085335.1
DS10_00006719	FBgn0010504	CG11546	kermit	Molecular function is unknown. Biological process: determination of adult lifespan; locomotion involved in locomotory behavior.	PDZ domain	7.07726	130.697	25.4573	XP_001970504.1
DS10_00007906	FBgn0035392	CG1271	n/a	Molecular function is unknown. Biological process: carbohydrate metabolic process.	ATPase, nucleotide binding domain	7.07557	4.38997	1.69614	AAQ22594.1
DS10_00013209	FBgn0038897	CG5849	n/a	Molecular function: aminopeptidase activity. Biological process: proteolysis	Aminopeptidase N-like , N-terminal	7.05628	12.4279	5.75831	AAM29440.1
DS10_00008610	FBgn0265082	CG44193	Cdep	BlastP against D. melanogaster AA	Chondrocyte-derived ezrin-like domain containing protein	7.05399	5.22461	2.41608	NP_001097685.2
DS10_00007905	FBgn0035392	CG1271	n/a	Molecular function is unknown. Biological process: carbohydrate metabolic process.	ATPase, nucleotide binding domain	7.05348	5.84602	2.90227	NP_647763.1
DS10_00002745	FBgn0003748	CG9364	Treh	Molecular function: trehalase activity. Biological process: trehalose metabolic process.	Trehalase, Glycoside hydrolase, family 37	7.02123	329.9	48.4947	ABH06690.1
DS10_00009830	FBgn0058263	CG40263	MFS17	Molecular function is unknown. Biological process: transmembrane transport.	Major Facilitator Superfamily Transporter 17, Major facilitator superfamily	6.98373	22.5257	8.23891	NP_001015095.1
DS10_00005250	FBgn0005670	CG3656	Cyp4d1	Molecular function: electron carrier activity. Biological process: oxidation-reduction process.	Cytochrome P450 superfamily	6.96624	128.273	25.4084	XP_002100302.1
DS10_00006870	FBgn0030484	CG1681	GstT4	Molecular function: glutathione transferase activity. Biological process is unknown.	Glutathione S transferase T4	6.96289	1725.57	235.705	XP_001978272.1
DS10_00012067	FBgn0262516, FBgn0261361	CG8743, CG42638	Trpml	Molecular function: calcium channel activity. Biological process: cellular calcium ion homeostasis; positive regulation of TOR signaling cascade; autophagic vacuole fusion; lateral inhibition; negative regulation of growth of symbiont in host; autophagy.	Transient receptor potential cation channel, mucolipin	6.95142	47.5969	13.0869	XP_002043608.1
DS10_00006317	FBgn0030318	CG1697	rho-4	Molecular function: serine-type peptidase activity. Biological process: proteolysis.	rhomboid-4, EF-Hand 1, calcium-binding site	6.91167	39.7864	11.5347	XP_002044097.1
DS10_00004416	FBgn0035313	CG13810	n/a	Molecular function is unknown. Biological process is unknown.		6.85996	3.40021	0.869756	NP_647697.2
DS10_00008317	FBgn0039349	CG4685	Ssadh	Molecular function: succinate-semialdehyde dehydrogenase (NAD+) activity. Biological process: gamma-aminobutyric acid catabolic process.	Succinic semialdehyde dehydrogenase, Aldehyde/histidinol dehydrogenase	6.85455	51.4656	13.9358	NP_651408.1
DS10_00005600	FBgn0085421	CG34392	Epac	Molecular function: cyclic nucleotide-dependent guanyl-nucleotide exchange factor activity; Rap guanyl-nucleotide exchange factor activity. Biological process: regulation of protein phosphorylation; regulation of small GTPase mediated signal transduction.	Exchange protein directly activated by cAMP, Cyclic nucleotide-binding domain	6.85006	6.36592	3.38729	NP_001097202.2
DS10_00011313	FBgn0038804	CG10877	n/a	Molecular function: catalytic activity. Biological process: metabolic process.	CoA-transferase family III	6.82633	3.31487	0.778243	XP_002043473.1
DS10_00011997	FBgn0038804	CG10877	n/a	Molecular function: catalytic activity. Biological process: metabolic process.	CoA-transferase family III	6.8155	5.34538	2.69753	XP_002043473.1
DS10_00000008	FBgn0051974	CG31974	n/a	Molecular function: transferase activity, transferring phosphorus-containing groups. Biological process is unknown.	ECDYSTEROID KINASE-LIKE	6.81235	252.058	41.3335	NP_722609.2
DS10_00009164	FBgn0039464	CG6330	n/a	Molecular function: uridine phosphorylase activity. Biological process: nucleotide catabolic process; nucleoside metabolic process.	Nucleoside phosphorylase domain	6.78245	18.5913	7.56929	NP_651515.1
DS10_00000886	FBgn0004858	CG4220	elB	Molecular function: protein binding. Biological process: wing disc development; eye-antennal disc development; cell proliferation; imaginal disc-derived appendage development; negative regulation of gene expression; Notch signaling pathway; open tracheal system development.	elbow B, Zinc finger C2H2-type	6.77983	6.08927	3.2747	XP_002089292.1
DS10_00010161	n/a	n/a	n/a	BlastP against D. melanogaster AA	n/a	6.76085	5.27815	2.70147	WP_040925884.1
DS10_00004375	FBgn0035358	CG14949	n/a	Molecular function is unknown. Biological process is unknown.		6.74455	20.4019	7.97854	ABC86435.1
DS10_00006238	FBgn0261703	CG42739	gce	Molecular function: transcription factor binding; protein heterodimerization activity. Biological process: negative regulation of programmed cell death; positive regulation of transcription from RNA polymerase II promoter.	germ cell-expressed bHLH-PAS, Helix-loop-helix DNA-binding domain superfamily	6.71829	40.9643	12.0283	NP_511160.2
DS10_00004542	FBgn0004429	CG9116	LysP	Molecular function: lysozyme activity. Biological process: antimicrobial humoral response.	Lysozyme P, Glycoside hydrolase, family 22	6.70997	13965.6	1299.99	XP_002093083.1
DS10_00010329	FBgn0038412	CG6898	Zip89B	Molecular function: metal ion transmembrane transporter activity. Biological process: transmembrane transport; metal ion transport.	Zinc/iron regulated transporter-related protein 89B, Zinc/iron permease	6.69449	5.10677	2.621	NP_536747.2
DS10_00002690	FBgn0031910	CG15818	n/a	Molecular function: carbohydrate binding. Biological process is unknown.	C-type lectin fold	6.69046	3.39992	0.973869	XP_002041745.1
DS10_00006637	FBgn0033774	CG12374	n/a	Molecular function: metallocarboxypeptidase activity. Biological process: proteolysis.	Carboxypeptidase, activation peptide	6.66375	3488.43	486.564	XP_002081251.1
DS10_00011381	FBgn0039308	CG11889	n/a	Molecular function: transferase activity, transferring phosphorus-containing groups. Biological process is unknown.	ECDYSTEROID KINASE-LIKE	6.63202	84.4268	19.751	ACO57625.1
DS10_00001024	FBgn0032799	CG10166	Dpm1	Molecular function: dolichyl-phosphate beta-D-mannosyltransferase activity. Biological process: protein glycosylation.	Dolichyl-phosphate mannosyltransferase subunit 1, OTHER MANNOSYLTRANSFERASES	6.60808	33.0411	10.6142	XP_002079945.1
DS10_00008409	FBgn0038734	CG11453	n/a	Molecular function: 4-coumarate-CoA ligase activity. Biological process: metabolic process.	AMP-dependent synthetase-like superfamily	6.5913	42.5516	12.6568	XP_002102801.1
DS10_00000383	FBgn0032018	CG7806	n/a	Molecular function: xenobiotic-transporting ATPase activity. Biological process: transmembrane transport.	ABC transporter type 1, transmembrane domain superfamily	6.59085	13.0148	6.22736	XP_002036191.1
DS10_00000611	FBgn0031451	CG9961	n/a	Molecular function: phosphoglycerate kinase activity. Biological process: glycolysis.	Phosphoglycerate kinase superfamily	6.5774	4.68125	2.34654	XP_001968452.1
DS10_00009306	FBgn0024957	CG6342	Irp-1B	Molecular function: iron-responsive element binding; aconitate hydratase activity. Biological process: regulation of translational initiation by iron.	Iron regulatory protein 1B, ACONITASES	6.57587	13.1026	6.27084	XP_001980674.1
DS10_00004203	FBgn0035708	CG8398	axed	Molecular function is unknown. Biological process is unknown.	axundead, BTB/Kelch-associated	6.56568	3.91507	1.59968	ACX70082.1
DS10_00003381	FBgn0259678	CG42347	sqa	Molecular function: protein serine/threonine kinase activity; protein kinase activity. Biological process: regulation of cell shape; protein autophosphorylation; positive regulation of TOR signaling cascade; protein phosphorylation; autophagy; actin filament organization.	spaghetti-squash activator, spaghetti-squash activator	6.56301	24.8705	9.17508	NP_724821.2
DS10_00004246	FBgn0037076	CG12972	ebd2	Molecular function: DNA binding. Biological process: adult somatic muscle development.	earthbound 2, DNA binding HTH domain, Psq-type	6.53191	3.89304	1.59781	XP_002095340.1
DS10_00002384	FBgn0033982	CG17453	Cyp317a1	Molecular function: electron carrier activity. Biological process: oxidation-reduction process.	Cytochrome P450 superfamily	6.52892	3.63391	1.32429	XP_001975564.1
DS10_00011692	FBgn0039081	CG4370	Irk2	Molecular function: inward rectifier potassium channel activity. Biological process: neuron projection morphogenesis; wing disc development; negative regulation of decapentaplegic signaling pathway; potassium ion transport; regulation of membrane potential.	Inwardly rectifying potassium channel 2, INWARDLY RECTIFYING POTASSIUM CHANNEL SUBUNITS	6.52656	7.85271	4.39872	XP_002032351.1
DS10_00008188	FBgn0029813	CG15766	AgmNAT	Molecular function: N-acetyltransferase activity. Biological process is unknown.	Agmatine N-acetyltransferase, OTHER ACETYLTRANSFERASES	6.51485	11.9892	6.00552	NP_572268.1
DS10_00002109	FBgn0260866	CG12489	dnr1	Molecular function: zinc ion binding. Biological process: negative regulation of biosynthetic process of antibacterial peptides active against Gram-negative bacteria; immune response; imaginal disc-derived wing morphogenesis; sleep.	defense repressor 1, OTHER RING DOMAIN UBIQUITIN LIGASES	6.49867	14.9178	6.83877	XP_002082631.1
DS10_00004379	FBgn0035355	CG16985	n/a	Molecular function is unknown. Biological process is unknown.	Acyl-coenzyme A thioesterase 13	6.46469	524.742	74.8767	XP_002035079.1
DS10_00000672	FBgn0011603	CG15444	ine	Molecular function: osmosensor activity. Biological process: regulation of response to osmotic stress; perineurial glial growth; transmission of nerve impulse.	inebriated, Sodium:neurotransmitter symporter	6.439	8.50991	4.82313	XP_002087939.1
DS10_00005904	FBgn0053172	CG33172	n/a	Molecular function is unknown. Biological process is unknown.	WD40/YVTN repeat-like-containing domain superfamily	6.43398	3.73555	1.51814	NP_788912.2
DS10_00008307	FBgn0037850	CG14695	n/a	Molecular function is unknown. Biological process is unknown.	Thioredoxin-like superfamily	6.42898	2.97164	0.650005	XP_002103927.1
DS10_00013066	FBgn0036318	CG11009	Wbp2	Molecular function is unknown. Biological process: positive regulation of imaginal disc growth; hippo signaling cascade; positive regulation of transcription, DNA-dependent.	WW domain binding protein 2, GRAM domain	6.40773	15.4995	7.09979	XP_001958322.1
DS10_00003828	FBgn0035976	CG4432	PGRP-LC	Molecular function: peptidoglycan receptor activity; protein binding; Gram-negative bacterial cell surface binding; protein dimerization activity; peptidoglycan binding. Biological process: biological regulation; immune system process; immune response; response to other organism; response to stress; response to stimulus; response to bacterium; defense response to bacterium; positive regulation of…	Peptidoglycan recognition protein LC, LONG PEPTIDOGLYCAN RECOGNITION PROTEINS	6.40363	8.90362	4.99992	XP_002029842.1
DS10_00010556	FBgn0263390	CG43442	Nha2	Molecular function: potassium ion antiporter activity. Biological process: renal sodium ion transport; potassium ion transmembrane transport; protein secretion.	Na+/H+ hydrogen antiporter 2, SLC9 FAMILY OF SODIUM/PROTON EXCHANGERS	6.40123	10.4476	5.62734	NP_732807.1
DS10_00002063	FBgn0034439	CG10062	n/a	Molecular function: peptidase activity. Biological process: proteolysis.	M28 METALLOEXOPEPTIDASES	6.38958	3.96773	1.80062	XP_002016522.1
DS10_00006769	FBgn0033775	CG17577	Cyp9h1	Molecular function: electron carrier activity. Biological process: oxidation-reduction process.	Cytochrome P450 superfamily	6.362	62.5879	17.0024	XP_002089650.1
DS10_00006427	FBgn0259171	CG42276	n/a	Molecular function: 3',5'-cyclic-nucleotide phosphodiesterase activity; 3',5'-cyclic-GMP phosphodiesterase activity. Biological process: neurogenesis.	Phosphodiesterase 9, CYCLIC-NUCLEOTIDE PHOSPHODIESTERASES	6.32577	5.3197	3.10814	XP_002042854.1
DS10_00004326	FBgn0037012	CG4786	Rcd2	Molecular function is unknown. Biological process: centriole replication.	Reduction in Cnn dots 2, VWFC domain	6.30189	18.1105	7.8008	XP_001973513.1
DS10_00003459	FBgn0259711	CG42365	n/a	Molecular function is unknown. Biological process is unknown.	n/a	6.28446	26.9587	9.95837	XP_002039796.1
DS10_00006958	FBgn0029762	CG3252	NAAT1	Molecular function: L-amino acid transmembrane transporter activity; D-amino acid transmembrane transporter activity; neutral amino acid transmembrane transporter activity. Biological process: D-amino acid transport; neutral amino acid transport; L-amino acid transport.	Nutrient Amino Acid Transporter 1, SLC6 FAMILY OF SODIUM/CHLORIDE-DEPENDENT NEUROTRANSMITTER TRANSPORTERS	6.28105	27.1496	10.0248	NP_572219.1
DS10_00001821	FBgn0086347	CG7438	Myo31DF	Molecular function: ATPase activity, coupled. Biological process: determination of left/right symmetry; imaginal disc-derived male genitalia morphogenesis; mesoderm development; determination of digestive tract left/right asymmetry.	Myosin 31DF, Class I myosin, motor domain	6.27448	133.83	28.5003	XP_002088237.1
DS10_00011702	FBgn0038257	CG7390	smp-30	Molecular function: calcium ion binding. Biological process: negative regulation of imaginal disc-derived wing size; cold acclimation; regulation of cell proliferation involved in imaginal disc-derived wing morphogenesis.	Senescence marker protein-30, GLUCONOLACTONASES	6.26453	2678.83	399.55	ADI77948.1
DS10_00002871	n/a	n/a	n/a	BlastP against D. melanogaster AA	n/a	6.2442	3.94886	1.89173	XP_002080502.1
DS10_00010427	FBgn0023197	CG6298	Jon74E	BlastP against D. melanogaster AA	Jonah 74E, S1A SERINE PROTEASES - CHYMOTRYPSIN-LIKE	6.23899	456.127	67.2239	ACX31359.1
DS10_00004590	FBgn0016715	CG3200	Reg-2	Molecular function: phosphoglycolate phosphatase activity. Biological process: metabolic process.	Rhythmically expressed gene 2, HAD hydrolase, subfamily IA	6.23603	37.8885	12.2216	XP_002093020.1
DS10_00007287	FBgn0003301	CG9533	rut	Molecular function: calcium- and calmodulin-responsive adenylate cyclase activity. Biological process: learning or memory; system process; response to stimulus; cognition; synaptic transmission; cellular component organization or biogenesis; associative learning; response to stress; transmission of nerve impulse; single-organism developmental process.	rutabaga	6.21034	5.81843	3.52176	NP_511156.2
DS10_00005784	FBgn0034387	CG15077	Cyp12b2	Molecular function: electron carrier activity. Biological process: oxidation-reduction process.	Cytochrome P450 superfamily	6.19611	5.59588	3.37819	XP_002034500.1
DS10_00000416	FBgn0032167	CG5853	n/a	Molecular function: ATPase activity, coupled to transmembrane movement of substances; transporter activity. Biological process: phagocytosis, engulfment.	ABCG ATP-BINDING CASSETTE TRANSPORTER SUBFAMILY	6.19024	99.8141	23.5951	XP_002078842.1
DS10_00008611	FBgn0265082	CG44193	Cdep	Molecular function: actin binding; Rho guanyl-nucleotide exchange factor activity; cytoskeletal protein binding. Biological process: regulation of Rho protein signal transduction.	Chondrocyte-derived ezrin-like domain containing protein, RHO GUANINE NUCLEOTIDE EXCHANGE FACTORS	6.17301	62.268	17.3601	XP_001978874.1
DS10_00004189	FBgn0001258	CG10160	Ldh	Molecular function: L-lactate dehydrogenase activity. Biological process: glycolysis.	Lactate dehydrogenase, OTHER CH-OH OXIDOREDUCTASES, NAD OR NADP AS ACCEPTOR	6.16475	125.52	27.7553	XP_002093920.1
DS10_00011698	FBgn0039094	CG10184	n/a	Molecular function: threonine aldolase activity. Biological process: cellular amino acid metabolic process.	ALDEHYDE-LYASES	6.13265	56.8709	16.3922	XP_002098447.1
DS10_00012971	FBgn0026061	CG4123	Mipp1	Molecular function: phosphoprotein phosphatase activity. Biological process is unknown.	Multiple inositol polyphosphate phosphatase 1, PHOSPHATIDYLINOSITOL PHOSPHATE AND INOSITOL PHOSPHATE PHOSPHATASES	6.12837	53.5721	15.8598	XP_002085154.1
DS10_00011091	FBgn0053258	CG33258	n/a	Molecular function: chitin binding. Biological process: chitin metabolic process.	CHITIN BINDING DOMAIN-CONTAINING PROTEINS	6.11908	33.7126	11.5064	ACD99553.1
DS10_00007572	FBgn0024179	CG10776	wit	Molecular function: transforming growth factor beta receptor activity, type II. Biological process: neuromuscular synaptic transmission; lateral inhibition; neuromuscular junction development.	wishful thinking, Activin Signaling Pathway Core Components	6.11465	3.21466	1.11458	XP_002083569.1
DS10_00000726	FBgn0031317	CG5118	Charon	Molecular function is unknown. Biological process is unknown.	Charon, NUCLEAR FACTOR - KAPPA B INHIBITOR FAMILY	6.10163	19.7801	8.4671	XP_002087517.1
DS10_00013227	FBgn0051473	CG31473	n/a	Molecular function: pyridoxamine-phosphate oxidase activity. Biological process: pyridoxine biosynthetic process.	CH-NH2 OXIDOREDUCTASES, OXYGEN AS ACCEPTOR	6.07433	48.3519	14.9196	NP_731186.2
DS10_00008536	FBgn0039419	CG12290	n/a	Molecular function: G-protein coupled receptor activity. Biological process: G-protein coupled receptor signaling pathway.	CLASS A GPCR NEUROPEPTIDE AND PROTEIN HORMONE RECEPTORS	6.07343	5.0145	3.08784	XP_002105035.1
DS10_00006026	FBgn0031099	CG17065	n/a	Molecular function: N-acetylglucosamine-6-phosphate deacetylase activity. Biological process: N-acetylglucosamine metabolic process.	N-ACETYLGLUCOSAMINE-6-PHOSPHATE DEACETYLASES	6.07167	42.1829	13.492	XP_002101879.1
DS10_00002948	FBgn0260455	CG10332	n/a	Molecular function is unknown. Biological process is unknown.	n/a	6.03965	10.8472	6.03695	XP_002040115.1
DS10_00004378	FBgn0035356	CG16986	n/a	Molecular function is unknown. Biological process is unknown.	Acyl-coenzyme A thioesterase 13	5.9949	688.33	99.1694	XP_002045394.1
DS10_00001031	FBgn0032787	CG10195	n/a	Molecular function: hydrolase activity. Biological process is unknown.	COA PYROPHOSPHATASES	5.98713	5.96654	3.78904	NP_609970.4
DS10_00005197	FBgn0030876	CG6762	n/a	Molecular function: sulfiredoxin activity; DNA binding. Biological process: oxidation-reduction process.	OTHER SULFUR OXIDOREDUCTASES	5.98299	35.5729	12.1451	NP_001188665.1
DS10_00002311	FBgn0034958	CG3907	n/a	Molecular function is unknown. Biological process is unknown.	n/a	5.97287	35.4224	12.1199	NP_611871.2
DS10_00012351	FBgn0053111	CG33111	n/a	Molecular function is unknown. Biological process is unknown.	Shootin-1	5.97203	25.1788	9.94155	NP_001262886.1
DS10_00006592	FBgn0052843	CG32843	Dh31-R	Molecular function: diuretic hormone receptor activity. Biological process: G-protein coupled receptor signaling pathway.	Diuretic hormone 31 Receptor, CLASS B GPCRs, SUBFAMILY B1	5.95575	3.33677	1.42037	NP_001260951.1
DS10_00001012	FBgn0032813	CG10262	PCNA2	Molecular function: DNA binding. Biological process: DNA replication.	Proliferating cell nuclear antigen 2, Proliferating cell nuclear antigen, PCNA	5.95263	4.69733	2.93214	XP_002090735.1
DS10_00011522	FBgn0052115	CG32115	n/a	Molecular function is unknown. Biological process is unknown.	n/a	5.91807	3.31483	1.40218	XP_002094647.1
DS10_00000903	FBgn0024244	CG10016	drm	Molecular function: zinc ion binding; nucleic acid binding. Biological process: digestive tract development; embryonic hindgut morphogenesis; hindgut morphogenesis; foregut morphogenesis; embryonic foregut morphogenesis; imaginal disc-derived leg joint morphogenesis.	drumstick, C2H2 ZINC FINGER TRANSCRIPTION FACTORS	5.89292	16.1386	7.66721	NP_722921.1
DS10_00010770	FBgn0037146	CG7470	P5CS	Molecular function: delta1-pyrroline-5-carboxylate synthetase activity; glutamate 5-kinase activity; glutamate-5-semialdehyde dehydrogenase activity. Biological process: proline biosynthetic process.	Δ1-pyrroline-5-carboxylate synthase, ALDEHYDE OR OXO OXIDOREDUCTASES, NAD OR NADP AS ACCEPTOR	5.88608	321.017	54.5614	XP_002095790.1
DS10_00001284	FBgn0032779	CG16771	Alp12	Molecular function: alkaline phosphatase activity. Biological process: metabolic process.	Alkaline phosphatase 12	5.8719	17.9702	8.20294	XP_001974260.1
DS10_00004361	FBgn0263392	CG43444	Tet	Molecular function: DNA binding; zinc ion binding. Biological process is unknown	Ten-Eleven Translocation (TET) family protein, OTHER PAIRED DONOR OXIDOREDUCTASES	5.87071	4.00889	2.28816	NP_001261344.1
DS10_00008908	FBgn0028394	CG17834	n/a	Molecular function is unknown. Biological process is unknown.	n/a	5.86098	45.5752	14.8231	NP_609242.2
DS10_00005801	FBgn0010053	CG15101	Jheh1	Molecular function: juvenile hormone epoxide hydrolase activity. Biological process: juvenile hormone catabolic process.	Juvenile hormone epoxide hydrolase 1, EPOXIDE HYDROLASES	5.83699	197.031	40.8218	ACV04610.1
DS10_00002512	FBgn0033926	CG12505	Arc1	Molecular function: zinc ion binding; nucleic acid binding. Biological process: behavioral response to starvation; muscle system process.	Activity-regulated cytoskeleton associated protein 1, ARC/ARG3.1 family. (Q7K1U0)	5.83369	808.197	119.228	NP_610955.1
DS10_00003553	FBgn0265487	CG33197	mbl	BlastP against D. melanogaster AA	muscleblind, Zinc finger, CCCH-type	5.83225	3.46324	1.68365	XP_002081889.1
DS10_00008559	FBgn0002733	CG14548	E(spl)mβ-HLH	Molecular function: sequence-specific DNA binding. Biological process: negative regulation of transcription from RNA polymerase II promoter.	Enhancer of split mβ, helix-loop-helix, Helix-loop-helix DNA-binding domain superfamily	5.81622	4.55816	2.94534	XP_002041333.1
DS10_00000226	FBgn0014396	CG3234	tim	Molecular function: protein binding; transcription factor binding; protein heterodimerization activity. Biological process: biological regulation; rhythmic process; response to stimulus; response to light stimulus; multi-organism reproductive process; mating; circadian sleep/wake cycle; energy taxis; locomotory behavior; cellular response to radiation; negative regulation of cellular biosynthetic…	timeless	5.80659	35.5299	12.456	NP_722914.3
DS10_00000809	FBgn0032889	CG9331	n/a	Molecular function: NAD binding; oxidoreductase activity, acting on the CH-OH group of donors, NAD or NADP as acceptor. Biological process: oxidation-reduction process.	OTHER CH-OH OXIDOREDUCTASES, NAD OR NADP AS ACCEPTOR	5.78695	236.737	46.0617	XP_002080084.1
DS10_00010553	FBgn0263390	CG43442	Nha2	Molecular function: potassium ion antiporter activity. Biological process: renal sodium ion transport; potassium ion transmembrane transport; protein secretion.	Na+/H+ hydrogen antiporter 2, SLC9 FAMILY OF SODIUM/PROTON EXCHANGERS	5.77593	4.48299	2.91409	NP_001247251.1
DS10_00005242	FBgn0023549	CG3456	Mct1	Molecular function: monocarboxylic acid transmembrane transporter activity. Biological process: transmembrane transport.	Monocarboxylate transporter 1, SLC16 FAMILY OF MONOCARBOXYLATE TRANSPORTERS	5.76388	75.9623	20.7768	XP_002040477.1
DS10_00005730	FBgn0034335	CG5164	GstE1	BlastP against D. melanogaster AA	Glutathione S transferase E1	5.75796	133.422	30.796	XP_966526.2
DS10_00009964	FBgn0038460	CG18622	n/a	Molecular function is unknown. Biological process is unknown.	n/a	5.74911	60.6976	18.2169	XP_002041156.1
DS10_00002631	FBgn0033744	CG12370	Dh44-R2	Molecular function: diuretic hormone receptor activity. Biological process: response to salt stress.	Diuretic hormone 44 receptor 2, CLASS B GPCRs, SUBFAMILY B1	5.73356	6.92203	4.59108	XP_002081200.1
DS10_00012562	FBgn0037753	CG12947	n/a	Molecular function is unknown. Biological process is unknown.	n/a	5.72595	2.90375	1.05845	XP_001980749.1
DS10_00007907	FBgn0052485	CG32485	n/a	Molecular function is unknown. Biological process is unknown.	CRAL/TRIO, N-terminal domain superfamily	5.67724	27.3424	10.8495	XP_002035126.1
DS10_00007939	FBgn0037163	CG11440	laza	Molecular function: phosphatidate phosphatase activity. Biological process: response to light intensity; phototransduction; thermotaxis.	lazaro, LIPID PHOSPHATE PHOSPHATASES	5.67531	20.838	9.18748	XP_002040915.1
DS10_00005684	FBgn0033190	CG2137	Gpo2	Molecular function: glycerol-3-phosphate dehydrogenase activity. Biological process: glycerol metabolic process.	Glycerophosphate oxidase 2, GLYCEROL-3-PHOSPHATE DEHYDROGENASES (QUINONE)	5.67154	2.80248	0.971242	NP_610295.1
DS10_00012809	FBgn0038113 + FBgn0038114	CG11668 + CG11670	n/a	BlastP against D. melanogaster AA	S1A SERINE PROTEASES - TRYPSIN-LIKE	5.64959	2.36426	0.484954	XP_001980321.1
DS10_00006220	FBgn0030640	CG6294	n/a	Molecular function is unknown. Biological process is unknown.	Uncharacterised protein family, zinc metallopeptidase-like	5.64816	27.8877	11.0265	XP_002100668.1
DS10_00003187	FBgn0028424	CG3767	JhI-26	Molecular function: transferase activity, transferring phosphorus-containing groups. Biological process is unknown.	Juvenile hormone-inducible protein 26	5.60009	55.7327	17.414	AAN71542.1
DS10_00002015	FBgn0262475	CG43065	bru2	Molecular function: RNA binding; mRNA binding. Biological process: negative regulation of translation.	bruno 2, CELF1/2, RNA recognition motif 1	5.57803	35.897	13.0843	XP_002042044.1
DS10_00000219	FBgn0287768	CG3758	esg	Molecular function: RNA polymerase II core promoter proximal region sequence-specific DNA binding transcription factor activity involved in negative regulation of transcription; DNA binding. Biological process: biological regulation; system development; single-organism developmental process; cell fate commitment; open tracheal system development; regulation of developmental process; negative regu…	escargot, C2H2 ZINC FINGER TRANSCRIPTION FACTORS	5.57362	2.28175	0.44227	XP_002090043.1
DS10_00002943	FBgn0266377	CG45019	Pde8	Molecular function: 3',5'-cyclic-AMP phosphodiesterase activity. Biological process: mesoderm development.	Phosphodiesterase 8, CYCLIC-NUCLEOTIDE PHOSPHODIESTERASES	5.57361	9.71159	6.01804	NP_001163275.2
DS10_00008593	FBgn0263346	CG43427	smash	Molecular function: zinc ion binding. Biological process: imaginal disc-derived wing morphogenesis.	Domain of unknown function DUF4757	5.56912	35.3189	12.9511	NP_649488.2
DS10_00004789	FBgn0031002	CG14196	n/a	Molecular function: secondary active monocarboxylate transmembrane transporter activity. Biological process: transmembrane transport.	SLC16 FAMILY OF MONOCARBOXYLATE TRANSPORTERS	5.54983	20.5399	9.25016	XP_001977755.1
DS10_00011632	FBgn0037090	CG7529	Est-Q	Molecular function: carboxylesterase activity. Biological process is unknown.	Esterase Q, Alpha/Beta hydrolase fold	5.54506	17.3147	8.4118	XP_002040816.1
DS10_00004417	FBgn0026570	CG5704	n/a	BlastP against D. melanogaster AA	Alpha/Beta hydrolase fold	5.51981	7.74095	5.16472	XP_002093240.1
DS10_00003899	FBgn0036043	CG8177	Ae2	Molecular function: anion:anion antiporter activity. Biological process: anion transport.	Anion exchanger 2, SLC4 FAMILY OF BICARBONATE TRANSPORTERS	5.49384	37.1478	13.5354	XP_002094245.1
DS10_00006169	FBgn0031968	CG7231	n/a	Molecular function is unknown. Biological process is unknown.	Protein of unknown function DUF2181	5.49078	147.111	35.1955	XP_001970219.1
DS10_00012870	FBgn0037818	CG6465	n/a	Molecular function: aminoacylase activity. Biological process: proteolysis; cellular amino acid metabolic process.	AMINOACYLASES	5.47194	4.82827	3.45425	XP_011208569.1
DS10_00002861	FBgn0050015	CG30015	n/a	Molecular function is unknown. Biological process is unknown.	Domain of unknown function DUF4739	5.46278	11.5183	6.7883	XP_001976160.1
DS10_00009928	n/a	n/a	n/a	BlastP against D. melanogaster AA	n/a	5.45924	9.23601	5.94739	NP_001287563.1
DS10_00002276	FBgn0019643	CG3318	AANAT1	Molecular function: N-acetyltransferase activity; arylamine N-acetyltransferase activity; aralkylamine N-acetyltransferase activity. Biological process: catecholamine metabolic process.	Arylalkylamine N-acetyltransferase 1	5.45656	305.119	56.672	XP_001976563.1
DS10_00000971	FBgn0032846	CG10721	Pyroxd1	Molecular function: oxidoreductase activity. Biological process: oxidation-reduction process.	Pyridine nucleotide-disulfide oxidoreductase domain 1	5.45267	12.621	7.16481	XP_001974180.1
DS10_00002484	FBgn0040751	CG13018	n/a	Molecular function is unknown. Biological process is unknown.	Cytochrome c oxidase assembly protein PET191	5.44311	2.69438	1.02635	XP_001975682.1
DS10_00013260	FBgn0015221	CG1469	Fer2LCH	Molecular function: ferrous iron binding. Biological process: chaeta development; hemolymph coagulation; cellular iron ion homeostasis.	Ferritin 2 light chain homologue	5.4413	4572.65	766.241	XP_001981210.1
DS10_00007286	FBgn0020508	CG9540	Ag5r2	Molecular function is unknown. Biological process is unknown.	Antigen 5-related 2, Venom allergen 3, insect	5.43617	321.045	58.7059	XP_001978161.1
DS10_00009866	FBgn0039596	CG10000	n/a	Molecular function: polypeptide N-acetylgalactosaminyltransferase activity. Biological process: oligosaccharide biosynthetic process.	POLYPEPTIDE N-ACETYLGALACTOSAMINYLTRANSFERASES	5.43365	2.15188	0.354997	XP_002105246.1
DS10_00004555	FBgn0024277	CG18214	trio	BlastP against D. melanogaster AA	n/a	5.42595	21.9865	9.8345	NP_728563.1
DS10_00013514	FBgn0032615	CG6012	n/a	Molecular function: oxidoreductase activity, acting on the CH-OH group of donors, NAD or NADP as acceptor. Biological process: metabolic process.	STEROID DEHYDROGENASES	5.41359	138.124	33.6516	XP_002090502.1
DS10_00013389	FBgn0039297	CG11852	n/a	Molecular function is unknown. Biological process is unknown.	Haemolymph juvenile hormone binding	5.40089	37.9259	13.9831	XP_002104873.1
DS10_00008603	FBgn0037279	CG1129	n/a	BlastP against D. melanogaster AA	GUANYLYLTRANSFERASES, Nucleotidyl transferase domain	5.39989	79.0947	22.511	XP_002038340.1
DS10_00004961	FBgn0086450	CG2194	su(r)	Molecular function: dihydropyrimidine dehydrogenase (NADP+) activity. Biological process: 'de novo' pyrimidine nucleobase biosynthetic process.	suppressor of rudimentary, CH-CH OXIDOREDUCTASES, NAD OR NADP AS ACCEPTOR	5.39859	91.3202	24.8395	XP_002106529.1
DS10_00009565	FBgn0287209	CG12449	Gfat1	Molecular function: glutamine-fructose-6-phosphate transaminase (isomerizing) activity. Biological process: carbohydrate biosynthetic process.	Glutamine:fructose-6-phosphate aminotransferase 1, TRANSAMINASES	5.39237	9.26263	6.01008	NP_001104465.1
DS10_00004426	FBgn0027547	CG1927	n/a	Molecular function is unknown. Biological process is unknown.	n/a	5.39156	222.372	47.1989	XP_001971234.1
DS10_00002495	FBgn0033913	CG8468	n/a	Molecular function: secondary active monocarboxylate transmembrane transporter activity. Biological process: transmembrane transport.	SLC16 FAMILY OF MONOCARBOXYLATE TRANSPORTERS	5.38304	7.64342	5.27575	NP_610940.1
DS10_00009302	FBgn0037817	CG14680	Cyp12e1	Molecular function: electron carrier activity. Biological process: oxidation-reduction process.	OTHER CYTOCHROMES P450	5.38131	3.16176	1.68473	NP_650003.4
DS10_00006677	FBgn0033234	CG8791	MFS12	Molecular function: high affinity inorganic phosphate:sodium symporter activity. Biological process: transmembrane transport.	Major Facilitator Superfamily Transporter 12, SLC17 FAMILY OF ORGANIC ANION TRANSPORTERS	5.38031	73.8089	21.6322	NP_610332.3
DS10_00010267	FBgn0037592	CG11737	n/a	Molecular function is unknown. Biological process is unknown.	Transmembrane protein 135	5.36643	5.69635	4.16372	XP_002104254.1
DS10_00004374	FBgn0035359	CG1143	n/a	Molecular function is unknown. Biological process is unknown.	n/a	5.35825	24.0576	10.4911	XP_001971300.1
DS10_00003756	FBgn0035868	CG7194	n/a	Molecular function is unknown. Biological process: gonad development.	Mab-21 domain	5.35032	10.4438	6.47283	XP_002093290.1
DS10_00006331	FBpp0311961	CG45017	IP3K2	Molecular function is unknown. Biological process is unknown.	Inositol polyphosphate kinase (IPK)	5.35029	22.6054	10.1101	XP_002042917.1
DS10_00004704	FBgn0003638	CG3019	su(wa)	Molecular function: RNA binding. Biological process: mRNA splicing, via spliceosome.	suppressor of white-apricot, SWAP/Surp superfamily	5.34605	83.2656	23.5167	XP_001982463.1
DS10_00009951	FBgn0039048	CG17111	n/a	Molecular function is unknown. Biological process: cell morphogenesis.	PAN/Apple domain	5.32989	8.13963	5.62193	XP_002098381.1
DS10_00013254	FBgn0020493	CG5201	Dad	Molecular function: transforming growth factor beta receptor, inhibitory cytoplasmic mediator activity. Biological process: single-organism developmental process; biological regulation; post-embryonic organ morphogenesis; regulation of developmental process; cellular component organization or biogenesis; localization; cellular component movement; instar larval or pupal morphogenesis; instar larva…	Daughters against dpp, Negative Regulators of BMP Signaling Pathway	5.32512	5.79452	4.31197	XP_002097237.1
DS10_00004155	FBgn0259164	CG42269	n/a	Molecular function: secondary active organic cation transmembrane transporter activity. Biological process: transmembrane transport.	SLC22 FAMILY OF ORGANIC IONS TRANSPORTERS	5.28294	3.5525	2.32633	NP_648019.2
DS10_00002901	n/a	n/a	n/a	BlastP against D. melanogaster AA	n/a	5.27769	8.17358	5.69323	XP_002080850.1
DS10_00009759	FBgn0015568	CG1031	α-Est1	Molecular function: carboxylesterase activity. Biological process is unknown.	α-Esterase-1, OTHER CARBOXYLESTERASES	5.27512	19.8532	9.44295	XP_002086767.1
DS10_00001237	FBgn0039644	CG11897	rdog	Molecular function: xenobiotic-transporting ATPase activity; drug transmembrane transporter activity. Biological process: transmembrane transport.	red dog mine, ABC transporter type 1, transmembrane domain	5.26465	4.2827	3.22764	XP_001974317.1
DS10_00003816	FBgn0040827	CG13315	n/a	Molecular function is unknown. Biological process is unknown.	n/a	5.2567	8092.76	1013.23	XP_002029827.1
DS10_00002394	FBgn0040759	CG13177	n/a	Molecular function is unknown. Biological process is unknown.	n/a	5.25472	25.3083	11.0004	XP_002091122.1
DS10_00003097	FBgn0027572	CG5009	ACOX1	Molecular function: palmitoyl-CoA oxidase activity. Biological process: fatty acid beta-oxidation.	acyl-CoA oxidase 1, ACYL-COA OXIDASES	5.24742	135.162	34.0666	XP_002081982.1
DS10_00006754	FBgn0014469	CG2060	Cyp4e2	Molecular function: electron carrier activity. Biological process: oxidation-reduction process.	Cytochrome P450-4e2	5.23679	42.2556	15.4799	XP_002032923.1
DS10_00010711	FBgn0036623	CG4729	Agpat3	Molecular function: 1-acylglycerol-3-phosphate O-acyltransferase activity. Biological process: metabolic process.	1-Acylglycerol-3-phosphate O-acyltransferase 3, Acyltransferase, C-terminal domain	5.23258	93.5494	26.052	XP_002095706.1
DS10_00006797	FBgn0050356	CG30356	n/a	Molecular function is unknown. Biological process is unknown.	High mobility group box domain superfamily	5.22376	3.19694	1.88339	XP_002032971.1
DS10_00001418	FBgn0051633	CG31633	n/a	Molecular function is unknown. Biological process is unknown.	F BOX ONLY PROTEINS	5.22257	12.3166	7.28848	XP_001970046.1
DS10_00009529	FBgn0015222	CG2216	Fer1HCH	Molecular function: ferrous iron binding. Biological process: cell proliferation; post-embryonic development; cellular iron ion homeostasis.	Ferritin 1 heavy chain homologue, FERRITINS	5.22222	1793.25	320.447	XP_002099381.1
DS10_00001200	FBgn0032699	CG10383	n/a	Molecular function: hydrolase activity, acting on ester bonds. Biological process: determination of adult lifespan.	GPI inositol-deacylase PGAP1-like	5.21825	50.6772	17.3946	XP_002090596.1
DS10_00008449	FBgn0004394	CG12287	pdm2	Molecular function: RNA polymerase II core promoter proximal region sequence-specific DNA binding transcription factor activity involved in positive regulation of transcription; DNA binding. Biological process: central nervous system development; ectoderm development; regulation of transcription, DNA-dependent; neuroblast development.	POU domain protein 2, POU HOMEOBOX TRANSCRIPTION FACTORS	5.21215	2.08798	0.378567	NP_523558.2
DS10_00012631	FBgn0039249	CG11168	n/a	Molecular function is unknown. Biological process is unknown.	Ankyrin repeat-containing domain superfamily	5.20541	8.12583	5.73431	XP_002099151.1
DS10_00005628	FBgn0027558	CG4445	Pgant3	Molecular function: polypeptide N-acetylgalactosaminyltransferase activity; acetylgalactosaminyltransferase activity; transferase activity, transferring glycosyl groups. Biological process: protein O-linked glycosylation; cell-substrate adhesion; oligosaccharide biosynthetic process; regulation of cell adhesion mediated by integrin; O-glycan processing; extracellular matrix constituent secretion.	Polypeptide N-Acetylgalactosaminyltransferase 3	5.19902	13.1258	7.56853	NP_610256.1
DS10_00005732	FBgn0063499	CG17522	GstE10	Molecular function: glutathione transferase activity. Biological process: glutathione metabolic process.	Glutathione S transferase E10	5.18987	5.06837	3.88332	XP_002091932.1
DS10_00006865	FBgn0085353	CG34324	n/a	Molecular function: chitin binding. Biological process: chitin metabolic process.	CHITIN BINDING DOMAIN-CONTAINING PROTEINS	5.18081	2113.09	382.595	XP_002100471.1
DS10_00011104	FBgn0027279	CG14616	l(1)G0196	BlastP against D. melanogaster AA	lethal (1) G0196, Histidine phosphatase superfamily, clade-2	5.17514	3.08626	1.7806	XP_001978730.1
DS10_00013049	FBgn0040383	CG5254	n/a	BlastP against D. melanogaster AA	SLC25 FAMILY OF MITOCHONDRIAL TRANSPORTERS, Mitochondrial carrier domain superfamily	5.17399	134.575	34.4316	NP_569856.2
DS10_00004334	FBgn0037000	CG5130	ZnT77C	Molecular function: zinc ion transmembrane transporter activity. Biological process: transmembrane transport; cation transport.	Zinc transporter 77C, SLC30 FAMILY OF ZINC TRANSPORTERS	5.16265	11.508	7.09803	XP_002040679.1
DS10_00008673	FBgn0037387	CG1213	n/a	Molecular function: glucose transmembrane transporter activity. Biological process: transmembrane transport.	SLC2 FAMILY OF HEXOSE SUGAR TRANSPORTERS	5.16122	456.195	80.4441	NP_649599.1
DS10_00002082	FBgn0034720	CG11206	Liprin-γ	Molecular function: protein binding; protein homodimerization activity. Biological process: negative regulation of synaptic growth at neuromuscular junction; axon target recognition.	Kazrin, SAM domain repeat 3	5.15854	3.19074	1.94006	XP_002092409.1
DS10_00000456	FBgn0010407	CG4926	Ror	Molecular function: transmembrane receptor protein tyrosine kinase activity. Biological process: central nervous system development.	RECEPTOR TYROSINE KINASES	5.15553	19.4053	9.45367	XP_002078898.1
DS10_00012421	FBgn0036742	CG7497	n/a	Molecular function: G-protein coupled receptor activity. Biological process: regulation of cell shape; actin filament organization.	GPCR, rhodopsin-like, 7TM	5.14943	5.92953	4.52642	XP_002094986.1
DS10_00006210	FBgn0022710	CG9210	Ac13E	Molecular function: adenylate cyclase activity. Biological process: cAMP biosynthetic process.	Adenylyl cyclase 13E, ADENYLATE CYCLASES	5.13126	9.3642	6.28672	NP_001259575.1
DS10_00008303	FBgn0042094	CG6612	Ak3	Molecular function: adenylate kinase activity. Biological process: ADP biosynthetic process.	Adenylate kinase 3, NUCLEOSIDE MONOPHOSPHATE KINASES	5.1297	55.7408	18.9093	XP_002031687.1
DS10_00005601	FBgn0033395	CG1944	Cyp4p2	Molecular function: electron carrier activity. Biological process: oxidation-reduction process.	OTHER CYTOCHROMES P450	5.12043	132.584	34.3938	AAR36858.1
DS10_00013431	FBgn0038321	CG6218	n/a	Molecular function is unknown. Biological process is unknown.	CARBOHYDRATE KINASES	5.11846	25.668	11.3728	XP_002097754.1
DS10_00012548	FBgn0037696	CG9362	GstZ1	Molecular function: glutathione transferase activity. Biological process: glutathione metabolic process.	Glutathione S transferase Z1, CYTOSOLIC GLUTATHIONE S-TRANSFERASES	5.10509	3.60159	2.60209	XP_002031898.1
DS10_00007842	FBgn0035445	CG12014	Ids	Molecular function: iduronate-2-sulfatase activity. Biological process: metabolic process.	Iduronate 2-sulfatase, OTHER SULFURIC ESTER HYDROLASES	5.09807	4.35333	3.43477	XP_002083496.1
DS10_00002494	n/a	n/a	n/a	BlastP against D. melanogaster AA	n/a	5.09802	6.9028	5.19669	NP_610940.1
DS10_00000398	FBgn0032002	CG8353	n/a	Molecular function: cytidine deaminase activity. Biological process: cytidine deamination.	CYTIDINE DEAMINASES	5.09363	48.6332	17.284	XP_002078610.1
DS10_00002596	FBgn0261611	CG42700	n/a	Molecular function is unknown. Biological process: cellular process.	n/a	5.08988	4.17794	3.28146	NP_001260916.1
DS10_00012238	FBgn0265140	CG7649	Meltrin	Molecular function: identical protein binding; metalloendopeptidase activity. Biological process: membrane protein ectodomain proteolysis; protein oligomerization.	ADAM METALLOPROTEASES	5.07948	4.7465	3.72812	XP_001979957.1
DS10_00000247	FBgn0016076	CG14029	vri	Molecular function: RNA polymerase II core promoter proximal region sequence-specific DNA binding transcription factor activity involved in negative regulation of transcription. Biological process: cellular process; circadian rhythm; chaeta morphogenesis; open tracheal system development; imaginal disc-derived wing hair organization.	vrille, BASIC LEUCINE ZIPPER TRANSCRIPTION FACTORS	5.07431	10.8536	6.95197	NP_477191.1
DS10_00009276	FBgn0085319	CG34290	n/a	Molecular function: serine-type endopeptidase activity. Biological process: proteolysis.	S1A SERINE PROTEASES - TRYPSIN-LIKE	5.07142	2.80083	1.49552	NP_001097899.2
DS10_00004982	FBgn0028550	CG11405	Atf3	Molecular function: protein binding; sequence-specific DNA binding. Biological process: immune response; lipid homeostasis; nervous system development.	Activating transcription factor 3, BASIC LEUCINE ZIPPER TRANSCRIPTION FACTORS	5.07121	4.45739	3.54479	NP_620473.1
DS10_00011613	FBgn0037818	CG6465	n/a	Molecular function: aminoacylase activity. Biological process: proteolysis; cellular amino acid metabolic process.	Peptidase M20	5.06355	3.07871	1.87336	XP_002097105.1
DS10_00002014	FBgn0262475	CG43065	bru2	BlastP against D. melanogaster AA	bruno 2, RNA recognition motif domain	5.05998	19.7866	9.74156	XP_001962915.1
DS10_00003322	FBgn0050345	CG30345	n/a	Molecular function: transporter activity. Biological process: transmembrane transport.	Major facilitator superfamily	5.05475	56.448	19.2449	XP_002089754.1
DS10_00011606	FBgn0037826	CG14689	n/a	Molecular function: phosphatase binding. Biological process: negative regulation of phosphatase activity.	Protein phosphatase 1 regulatory subunit 36	5.05439	5.32014	4.23021	XP_002097115.1
DS10_00012087	FBgn0036553	CG17027	n/a	Molecular function: inositol monophosphate 1-phosphatase activity. Biological process: dephosphorylation.	Inositol monophosphatase	5.05324	9.82602	6.54905	XP_002085035.1
DS10_00003677	FBgn0086708	CG32130	stv	Molecular function: serine-type endopeptidase activity; chaperone binding. Biological process: protein lipidation; lateral inhibition.	starvin, BAG domain	5.04876	49.2748	17.583	NP_001097600.1
DS10_00004390	FBgn0035343	CG16762	n/a	Molecular function is unknown. Biological process is unknown.	Protein TsetseEP	5.04841	7.73445	5.67394	XP_002083364.1
DS10_00004688	FBgn0029771	CG12730	n/a	Molecular function is unknown. Biological process is unknown.	Marvel domain	5.03813	25.1069	11.358	XP_002036908.1
DS10_00000780	FBgn0051663	CG31663	n/a	Molecular function is unknown. Biological process is unknown.	Major facilitator superfamily associated domain	5.0336	4.84862	3.86492	NP_001245843.1
DS10_00004793	FBgn0030998	CG14195	n/a	Molecular function is unknown. Biological process is unknown.	MFS transporter superfamily	5.02817	2.51816	1.13096	XP_002101710.1
DS10_00002695	FBgn0082585	CG30023	sprt	Molecular function is unknown. Biological process: larval heart development.	sprite, I-BAR domain containing protein MTSS1/MTSS2	5.02225	18.7827	9.48439	XP_002006446.1
DS10_00008671	FBgn0263830	CG40486	n/a	Molecular function: oxidoreductase activity; oxidoreductase activity, acting on the CH-OH group of donors, NAD or NADP as acceptor. Biological process: metabolic process.	NAD(P)-binding domain superfamily	5.00299	87.4073	25.7195	XP_002102299.1
DS10_00009742	FBgn0023495	CG8823	Lip3	Molecular function: triglyceride lipase activity. Biological process: lipid metabolic process.	Alpha/Beta hydrolase fold	4.98313	36.3934	14.5717	XP_002103580.1
DS10_00007439	FBgn0003890	CG4869	βTub97EF	Molecular function: structural constituent of cytoskeleton. Biological process: centrosome duplication.	β-Tubulin at 97EF, Tubulin/FtsZ, GTPase domain superfamily	4.97832	79.0138	24.1081	XP_002043001.1
DS10_00008652	FBgn0040259	CG18578	Ugt302C1	Molecular function: glucuronosyltransferase activity. Biological process: metabolic process.	UDP-glucuronosyl/UDP-glucosyltransferase	4.96678	137.054	35.9861	NP_652626.1
DS10_00010953	FBgn0037307	CG14666	Tim17a2	Molecular function: P-P-bond-hydrolysis-driven protein transmembrane transporter activity. Biological process: protein targeting to mitochondrion; protein transport.	Belongs to the Tim17/Tim22/Tim23 family.	4.96384	2.29384	0.890692	NP_649524.1
DS10_00009846	FBgn0013685	CG34089	mt:ND6	Molecular function: NADH dehydrogenase (ubiquinone) activity. Biological process: oxidation-reduction process.	mitochondrial NADH-ubiquinone oxidoreductase chain 6	4.96315	57.8223	19.8219	AHG53580.1
DS10_00011929	FBgn0020278	CG5248	loco	Molecular function: G-protein alpha-subunit binding; GTPase activator activity. Biological process: response to stress; single-organism developmental process; system development; cellular component organization or biogenesis; localization; glial cell differentiation; response to stimulus; response to nutrient levels; biological regulation; ventral cord development; cell fate commitment; establish…	locomotion defects, GoLoco motif	4.96215	9.86474	6.69782	XP_002098322.1
DS10_00011350	FBgn0038237	CG8279	Pde6	Molecular function: 3',5'-cyclic-GMP phosphodiesterase activity. Biological process: negative regulation of nucleobase-containing compound transport; cGMP metabolic process.	Phosphodiesterase 6, 3'5'-cyclic nucleotide phosphodiesterase	4.96209	4.19524	3.4173	XP_002097859.1
DS10_00010335	FBgn0013275	CG31366	Hsp70Aa	BlastP against D. melanogaster AA	Heat-shock-protein-70Aa, HEAT SHOCK PROTEIN 70 CHAPERONES	4.95182	40.5498	15.6889	XP_001983097.1
DS10_00002269	FBgn0266083	CG3363	ocm	Molecular function is unknown. Biological process: neurogenesis.	over compensating males, Domain of unknown function DUF4801	4.9513	25.5497	11.6532	XP_002092789.1
DS10_00005644	FBgn0033153	CG11086	Gadd45	Molecular function is unknown. Biological process: JNK cascade; regulation of oviposition.	Growth arrest and DNA damage-inducible 45, 50S ribosomal protein L30e-like	4.94438	7.99292	5.90215	NP_610264.1
DS10_00003832	FBgn0085484	CG34455	Pdxk	Molecular function: pyridoxal kinase activity. Biological process: pyridoxal 5'-phosphate salvage.	Pyridoxal kinase, Pyridoxamine kinase/Phosphomethylpyrimidine kinase	4.93797	124.006	33.8122	AAR82765.1
DS10_00001446	FBgn0031865	CG10806	Nha1	Molecular function: sodium:hydrogen antiporter activity. Biological process: renal sodium ion transport.	Na+/H+ hydrogen antiporter 1, Cation/H+ exchanger	4.93054	58.4162	20.1305	NP_723224.2
DS10_00010518	FBgn0285910	CG2934	VhaAC39-1	Molecular function: proton-transporting ATPase activity, rotational mechanism. Biological process: regulation of Notch signaling pathway; vacuolar acidification.	Vacuolar H+ ATPase AC39 subunit 1, V-type ATP synthase subunit C-like	4.92178	256.552	55.7271	XP_001963746.1
DS10_00006167	FBgn0085450	CG34421	Snoo	Molecular function: nucleotide binding. Biological process: negative regulation of decapentaplegic signaling pathway; neuron development; negative regulation of transforming growth factor beta receptor signaling pathway.	Sno oncogene, c-SKI SMAD4-binding domain	4.91646	3.51755	2.68395	XP_002036129.1
DS10_00008266	FBgn0038490	CG5285	n/a	Molecular function: single-strand selective uracil DNA N-glycosylase activity. Biological process is unknown.	Single-strand selective monofunctional uracil DNA glycosylase	4.91377	5.91588	4.78538	XP_002041115.1
DS10_00010428	n/a	n/a	n/a	BlastP against D. melanogaster AA	n/a	4.90771	50.1512	18.3161	XP_002094994.1
DS10_00006489	FBgn0030752	CG9947	CDC50	Molecular function is unknown. Biological process is unknown.	CDC50/LEM3 family	4.89504	151.09	40.1484	XP_002100813.1
DS10_00009532	FBgn0039764	CG15535	n/a	Molecular function is unknown. Biological process is unknown.	Fyv7/TAP26	4.88558	7.076	5.56245	XP_002105500.1
DS10_00009879	FBgn0016797	CG9739	fz2	Molecular function: Wnt-activated receptor activity; PDZ domain binding; Wnt-protein binding. Biological process: single-organism developmental process; cellular component organization or biogenesis; biological regulation; system development; cellular process; cellular component movement; localization; gland morphogenesis; post-embryonic organ morphogenesis; sensory organ development.	frizzled 2, Frizzled/secreted frizzled-related protein	4.88154	6.88006	5.46119	XP_002086349.1
DS10_00000478	FBgn0032587	CG5953	n/a	Molecular function is unknown. Biological process: lateral inhibition.	MADF domain	4.87759	6.34383	5.07959	NP_001162989.1
DS10_00007655	FBgn0027339	CG11352	jim	Molecular function: sequence-specific DNA binding transcription factor activity. Biological process: regulation of chromatin silencing.	Zinc finger C2H2 superfamily	4.87411	3.15928	2.21525	NP_001262223.1
DS10_00006175	FBgn0031974	CG12560	n/a	Molecular function: N-acetyltransferase activity. Biological process is unknown.	Acyl-CoA N-acyltransferase	4.87001	33.7197	14.1376	XP_002078575.1
DS10_00007126	FBgn0051999	CG31999	n/a	Molecular function: calcium ion binding. Biological process: cell adhesion.	Complement Clr-like EGF domain	4.86506	10.7003	7.13556	XP_002099585.1
DS10_00005070	FBgn0030839	CG5613	n/a	Molecular function: protein binding. Biological process is unknown.	Cytosolic endo-beta-N-acetylglucosaminidase	4.8588	3.53281	2.78462	AFB18660.1
DS10_00013211	FBgn0260935	CG9746	Vps15	Molecular function: protein serine/threonine kinase activity. Biological process: cellular response to amino acid starvation; positive regulation of antibacterial peptide biosynthetic process; macroautophagy; regulation of antimicrobial peptide production.	Protein kinase domain	4.85797	5.45659	4.50069	XP_002104160.1
DS10_00008708	FBgn0035588	CG10672	n/a	Molecular function: oxidoreductase activity, acting on CH-OH group of donors. Biological process: metabolic process.	NAD(P)-binding domain superfamily	4.85459	11.4553	7.39894	NP_647946.1
DS10_00007845	FBgn0004167	CG12008	kst	Molecular function: actin binding; protein binding; microtubule binding. Biological process: regulation of multivesicular body size involved in endosome transport; endocytosis; endosome transport via multivesicular body sorting pathway; wound healing; cytokinesis.	karst, Actinin-type actin-binding domain, conserved site	4.85308	65.3319	21.9358	NP_001097492.2
DS10_00004804	FBgn0261461	CG42274	RhoGAP18B	Molecular function: GTPase activator activity. Biological process: behavioral response to nicotine; behavioral response to ethanol; actin filament organization.	Rho GTPase activating protein at 18B, Rho GTPase-activating protein domain	4.84877	13.266	7.97985	XP_002058964.1
DS10_00001313	FBgn0031738	CG9171	n/a	Molecular function: N-acetyllactosaminide beta-1,6-N-acetylglucosaminyltransferase activity. Biological process: inter-male aggressive behavior.	GLUCURONOSYLTRANSFERASES	4.84827	24.1463	11.4743	NP_723117.1
DS10_00008175	FBgn0030823	CG8918	TTLL1A	Molecular function: tubulin-tyrosine ligase activity. Biological process: cellular protein modification process.	Tubulin tyrosine ligase-like 1A, ATP-grasp fold, subdomain 1	4.83704	6.51537	5.22734	XP_002101465.1
DS10_00001962	FBgn0264815	CG44007	Pde1c	Molecular function: calcium- and calmodulin-regulated 3',5'-cyclic-GMP phosphodiesterase activity; 3',5'-cyclic-GMP phosphodiesterase activity; 3',5'-cyclic-AMP phosphodiesterase activity. Biological process: cAMP metabolic process; male mating behavior; cGMP metabolic process; multicellular organism reproduction.	Phosphodiesterase 1c, 3'5'-cyclic nucleotide phosphodiesterase	4.83686	4.09403	3.44133	XP_002079144.1
DS10_00005681	FBgn0033188	CG1600	Drat	Molecular function: nucleotide binding; oxidoreductase activity; zinc ion binding. Biological process: response to hypoxia; cellular response to ethanol.	Death resistor Adh domain containing target, GroES-like superfamily	4.83484	167.256	43.5176	XP_002089487.1
DS10_00005436	FBgn0029710	CG3568	n/a	Molecular function is unknown. Biological process is unknown.	Protein of unknown function DUF4804	4.83246	6.84208	5.47352	XP_001976885.1
DS10_00012313	FBgn0066101	CG31094	LpR1	Molecular function: receptor activity. Biological process: receptor-mediated endocytosis.	Lipophorin receptor 1, EGF-like calcium-binding, conserved site	4.83057	26.8244	12.2797	NP_001097934.2
DS10_00004161	FBgn0035679	CG10467	n/a	Molecular function: aldose 1-epimerase activity. Biological process: hexose metabolic process.	Aldose 1-/Glucose-6-phosphate 1-epimerase	4.82217	79.0536	24.7922	XP_002083817.1
DS10_00010671	FBgn0261556	CG42674	n/a	Molecular function: Rho guanyl-nucleotide exchange factor activity; phospholipid binding. Biological process: regulation of cell shape; cell adhesion; imaginal disc-derived leg morphogenesis.	Pleckstrin homology domain-containing family G member 5/7	4.81034	6.54543	5.27588	NP_649182.4
DS10_00000354	FBgn0032042	CG13398	n/a	Molecular function: insulin receptor binding. Biological process is unknown.	FRS2, PTB domain	4.80631	7.52227	5.80888	XP_001970308.1
DS10_00009688	FBgn0038761	CG17190	n/a	Molecular function is unknown. Biological process is unknown.	n/a	4.80621	4.33533	3.68032	XP_001979472.1
DS10_00006971	FBgn0024250	CG9653	brk	Molecular function: RNA polymerase II distal enhancer sequence-specific DNA binding; sequence-specific DNA binding. Biological process: wing disc morphogenesis; negative regulation of gene expression; cell competition in a multicellular organism; negative regulation of transforming growth factor beta receptor signaling pathway; negative regulation of transcription from RNA polymerase II promoter;…	brinker, OTHER DNA BINDING DOMAIN TRANSCRIPTION FACTORS	4.79533	3.07875	2.17699	XP_002043219.1
DS10_00001283	FBgn0016675	CG9976	Lectin-galC1	Molecular function: galactose binding; Gram-negative bacterial cell surface binding. Biological process: induction of bacterial agglutination; calcium-dependent cell-cell adhesion.	Galactose-specific C-type lectin, C-TYPE LECTIN-LIKE	4.79094	35.233	14.8122	XP_002090695.1
DS10_00005530	FBgn0034031	CG12963	n/a	Molecular function is unknown. Biological process is unknown.	n/a	4.77194	1.80859	0.219759	XP_002092349.1
DS10_00008273	FBgn0038490	CG5285	n/a	Molecular function: single-strand selective uracil DNA N-glycosylase activity. Biological process is unknown.	DNA N-GLYCOSYLASES	4.76508	4.50225	3.86592	NP_650609.1
DS10_00008395	FBgn0030519	CG11151	n/a	Molecular function: estradiol 17-beta-dehydrogenase activity. Biological process is unknown.	Lipid-binding protein	4.76337	1082.75	210.222	NP_572917.1
DS10_00001560	FBgn0041092	CG13109	tai	Molecular function: steroid hormone receptor binding; ligand-dependent nuclear receptor transcription coactivator activity. Biological process: border follicle cell migration; axon extension involved in development; germ-line stem-cell niche homeostasis.	taiman, BASIC HELIX-LOOP-HELIX TRANSCRIPTION FACTORS	4.75702	5.81829	4.88743	XP_002088908.1
DS10_00002699	FBgn0034543	CG30152	galla-1	Molecular function is unknown. Biological process is unknown.	Fe-S cluster assembly domain superfamily	4.73409	27.5382	12.8076	XP_002082370.1
DS10_00007800	FBgn0023076	CG7391	Clk	Molecular function: RNA polymerase II regulatory region sequence-specific DNA binding; protein binding; transcription factor binding; protein heterodimerization activity; DNA binding. Biological process: regulation of circadian sleep/wake cycle, sleep; positive regulation of transcription from RNA polymerase II promoter; circadian rhythm; locomotor rhythm; positive regulation of transcription, DN…	Clock, BASIC HELIX-LOOP-HELIX TRANSCRIPTION FACTORS	4.73142	2.73792	1.7646	XP_001971403.1
DS10_00007734	FBgn0051477	CG31477	ATPsynεL	Molecular function: hydrogen-exporting ATPase activity, phosphorylative mechanism. Biological process: proton transport.	ATP synthase, ε subunit-like, MITOCHONDRIAL F1 ATP SYNTHASE COMPLEX SUBUNITS	4.72869	2.33531	1.13865	XP_001980704.1
DS10_00008427	FBgn0260003	CG34157	Dys	BlastP against D. melanogaster AA	Dystrophin, DYSTROPHIN GLYCOPROTEIN COMPLEX	4.72818	2.86991	1.95018	NP_001262731.1
DS10_00006146	FBgn0032078	CG9520	C1GalTA	Molecular function: beta-1,3-galactosyltransferase activity; glycoprotein-N-acetylgalactosamine 3-beta-galactosyltransferase activity. Biological process: protein glycosylation; glycolipid biosynthetic process; central nervous system morphogenesis; O-glycan processing, core 1.	Core 1 Galactosyltransferase A, Fringe-like	4.72122	69.5144	23.4429	XP_002078722.1
DS10_00008455	FBgn0032449	CG17036	n/a	Molecular function: reduced folate carrier activity. Biological process: transport.	SLC19 FAMILY OF VITAMIN TRANSPORTERS	4.70564	6.13437	5.10878	XP_002042078.1
DS10_00003850	FBgn0040305	CG3743	MTF-1	Molecular function: sequence-specific DNA binding transcription factor activity; transcription regulatory region sequence-specific DNA binding. Biological process: response to copper ion; positive regulation of transcription from RNA polymerase II promoter; zinc ion homeostasis; response to metal ion; cellular metal ion homeostasis; response to stress.	Metal response element-binding Transcription Factor-1, C2H2 ZINC FINGER TRANSCRIPTION FACTORS	4.7052	14.4309	8.5272	XP_001972166.1
DS10_00001495	FBgn0259111	CG42253	Ndae1	Molecular function: anion:anion antiporter activity. Biological process: chloride transport; anion transport; bicarbonate transport; sodium ion transport; proton transport.	Na+-driven anion exchanger 1,SLC4 FAMILY OF BICARBONATE TRANSPORTERS	4.70404	58.3277	20.8557	XP_001970135.1
DS10_00007841	FBgn0014388	CG1921	sty	Molecular function is unknown. Biological process: negative regulation of fibroblast growth factor receptor signaling pathway; muscle fiber development; regulation of compound eye photoreceptor development; tracheal outgrowth, open tracheal system; ommatidial rotation; branching involved in open tracheal system development; open tracheal system development; compound eye morphogenesis.	sprouty, Negative Regulators of Torso Signaling Pathway	4.70263	5.77447	4.89969	XP_002093561.1
DS10_00008923	FBgn0036770	CG5485	Prestin	Molecular function: formate transmembrane transporter activity; sulfate transmembrane transporter activity; oxalate transmembrane transporter activity; bicarbonate transmembrane transporter activity; inorganic anion exchanger activity. Biological process: sulfate transport; bicarbonate transport; oxalate transport; formate transport.	SLC26 FAMILY OF ANION EXCHANGERS	4.69338	11.7332	7.64299	XP_002085337.1
DS10_00005088	FBgn0263258	CG32556	chas	Molecular function is unknown. Biological process: establishment of body hair or bristle planar orientation; imaginal disc-derived wing morphogenesis.	chascon	4.69208	4.99913	4.35394	NP_001285381.1
DS10_00002383	FBgn0027596	CG10249	Kank	Molecular function is unknown. Biological process: neuron projection morphogenesis.	Ankyrin repeat	4.68733	9.86437	7.00504	NP_001188932.1
DS10_00002225	FBgn0050394	CG30394	n/a	Molecular function: amino acid transmembrane transporter activity. Biological process: amino acid transmembrane transport.	Amino acid transporter, transmembrane domain	4.68008	18.8673	10.0547	NP_611578.1
DS10_00012663	FBgn0038889	CG7922	Fancm	Molecular function: helicase activity; ATP-dependent RNA helicase activity. Biological process is unknown.	Fanconi anemia group M helicase, Helicase superfamily 1/2, ATP-binding domain	4.67312	5.18073	4.50831	XP_002086716.1
DS10_00007765	n/a	n/a	n/a	BlastP against D. melanogaster AA	n/a	4.67177	2.29576	1.14515
DS10_00008709	FBgn0035587	CG4623	Gdap1	Molecular function is unknown. Biological process is unknown.	Glutathione S-transferase	4.67147	5.08755	4.44671	XP_002035424.1
DS10_00006373	FBgn0030808	CG4937	RhoGAP15B	Molecular function: small GTPase regulator activity. Biological process: imaginal disc-derived leg morphogenesis.	Rho GTPase activating protein at 15B, Rho GTPase activation protein	4.66822	8.74375	6.5116	XP_002101444.1
DS10_00001181	FBgn0032682	CG10176	grnd	Molecular function is unknown. Biological process is unknown.	grindelwald, TUMOR NECROSIS FACTOR RECEPTORS	4.65511	3.16639	2.46551	NP_609880.2
DS10_00007753	FBgn0053208	CG33208	Mical	Molecular function: actin binding; NADPH:sulfur oxidoreductase activity. Biological process: axon guidance; dendrite morphogenesis; actin filament depolymerization; neuron remodeling; sulfur oxidation; sarcomere organization; NADPH oxidation.	Molecule interacting with CasL, FAD/NAD(P)-binding domain superfamily	4.65434	7.21976	5.83819	NP_001247014.1
DS10_00008388	FBgn0030511	CG11158	n/a	Molecular function is unknown. Biological process is unknown.	Inosine/uridine-preferring nucleoside hydrolase domain	4.65109	10.6696	7.34165	XP_001978243.1
DS10_00013272	FBgn0264605	CG43954	n/a	Molecular function is unknown. Biological process is unknown.	n/a	4.65067	2.30042	1.17455	XP_001957639.1
DS10_00004535	FBgn0035192	CG9194	galene	Molecular function: open rectifier potassium channel activity. Biological process: lateral inhibition.	galene, Potassium channel domain	4.65024	2.41686	1.36594	XP_002083183.1
DS10_00008380	FBgn0030503	CG11176	Tango2	Molecular function is unknown. Biological process: Golgi organization; protein secretion.	Transport and Golgi organization 2, Transport and Golgi organisation protein 2	4.64627	15.5423	9.02727	NP_001245654.1
DS10_00002216	FBgn0085232	CG34203	n/a	Molecular function is unknown. Biological process is unknown.	n/a	4.64495	16.2777	9.23522	XP_002091555.1
DS10_00011477	FBgn0036741	CG7510	anchor	BlastP against D. melanogaster AA	Winged helix DNA-binding domain superfamily	4.63172	6.73967	5.6252	AAL25359.1
DS10_00005693	FBgn0263077	CG43340	n/a	Molecular function is unknown. Biological process: imaginal disc-derived wing morphogenesis.	Zinc finger, FYVE/PHD-type	4.62915	14.8492	8.82194	NP_001246184.1
DS10_00012280	n/a	n/a	n/a	BlastP against D. melanogaster AA	n/a	4.6273	5.00742	4.42616	XP_011213383.1
DS10_00009246	FBgn0037313	CG1161	n/a	Molecular function is unknown. Biological process is unknown.	TMEM9	4.61562	12.3381	7.96679	XP_002038394.1
DS10_00013448	FBgn0037712	CG16789	n/a	Molecular function: ATP binding. Biological process is unknown.	ATPase, AAA-type, core	4.61	2.54876	1.60728	XP_002096964.1
DS10_00005350	FBgn0030887	CG6867	n/a	Molecular function is unknown. Biological process is unknown.	Collagen triple helix repeat	4.60669	2.74102	1.9039	NP_573262.2
DS10_00010367	FBgn0038881	CG16791	n/a	Molecular function is unknown. Biological process: phagocytosis, engulfment.	n/a	4.59473	5.62861	4.91584	NP_001287443.1
DS10_00001337	FBgn0261239	CG8676	Hr39	Molecular function: RNA polymerase II core promoter proximal region sequence-specific DNA binding; ligand-activated sequence-specific DNA binding RNA polymerase II transcription factor activity. Biological process: female meiosis chromosome segregation; activation of cysteine-type endopeptidase activity involved in apoptotic process; spermathecum morphogenesis; regulation of gene silencing; ecdys…	Hormone receptor-like in 39, Nuclear hormone receptor-like domain superfamily	4.59395	6.59203	5.58788	AAA28543.1
DS10_00008331	FBgn0040212	CG4625	Dhap-at	Molecular function: glycerone-phosphate O-acyltransferase activity; glycerol-3-phosphate O-acyltransferase activity. Biological process: phospholipid biosynthetic process.	Dihydroxyacetone phosphate acyltransferase	4.58323	4.65282	4.22537	XP_001981788.1
DS10_00011225	FBgn0028662	CG7007	VhaPPA1-1	Molecular function: hydrogen ion transmembrane transporter activity. Biological process: mitotic spindle organization.	Vacuolar H+ ATPase PPA1 subunit 1, F/V-ATP synthase subunit C superfamily	4.58112	935.688	189.427	NP_652010.1
DS10_00013078	FBgn0063368	CG40041	Gpb5	Molecular function: hormone activity; protein heterodimerization activity. Biological process is unknown.	Glycoprotein hormone beta 5, NEUROPEPTIDES	4.57074	2.34713	1.33088	XP_003736156.1
DS10_00006613	FBgn0028991	CG32904	seq	Molecular function: zinc ion binding; nucleic acid binding. Biological process: negative regulation of axon extension; axon guidance; sensory organ development; dendrite morphogenesis; terminal cell fate specification, open tracheal system; branching involved in open tracheal system development; negative regulation of transcription from RNA polymerase II promoter; axonogenesis.	sequoia, C2H2 ZINC FINGER TRANSCRIPTION FACTORS	4.56779	4.60387	4.18383	XP_002081298.1
DS10_00012635	FBgn0025680	CG3772	cry	Molecular function: photoreceptor activity; flavin adenine dinucleotide binding; blue light photoreceptor activity; protein binding. Biological process: biological regulation; response to stimulus; response to light stimulus; response to abiotic stimulus; rhythmic process; detection of abiotic stimulus; system process; circadian rhythm; locomotory behavior; protein localization to nucleus; sensor…	cryptochrome, Cryptochrome/DNA photolyase, FAD-binding domain	4.5663	18.7768	10.2027	XP_002043337.1
DS10_00005965	FBgn0029997	CG2258	n/a	Molecular function: protein binding. Biological process is unknown.	Domain of unknown function DUF2013,SPIN90, SH3 domain	4.56215	29.4385	13.7589	XP_002101193.1
DS10_00010866	FBgn0036332	CG11261	Cul6	Molecular function: ubiquitin protein ligase binding. Biological process: ubiquitin-dependent protein catabolic process.	Cullin 6, Winged helix-like DNA-binding domain superfamily	4.54364	1.84937	0.435676	XP_002094657.1
DS10_00006788	FBgn0039537	CG5590	n/a	Molecular function: oxidoreductase activity, acting on the CH-OH group of donors, NAD or NADP as acceptor. Biological process: metabolic process.	NAD(P)-binding domain superfamily	4.54338	55.8954	20.7934	XP_001961373.1
DS10_00004981	FBgn0025642	CG32812	n/a	Molecular function: calcium-dependent protein serine/threonine phosphatase activity; calcium ion binding; calcium-dependent protein serine/threonine phosphatase regulator activity; calmodulin binding. Biological process: protein dephosphorylation.	EF-hand domain	4.542	2.49527	1.60254	XP_002099774.1
DS10_00010571	FBgn0051231	CG31231	n/a	Molecular function is unknown. Biological process is unknown.	Domain of unknown function DUF4201	4.53932	3.64683	3.30689	XP_001979620.1
DS10_00001057	FBgn0040297	CG9256	Nhe2	Molecular function: sodium:hydrogen antiporter activity. Biological process: cellular ion homeostasis.	Na+/H+ hydrogen exchanger 2, SLC9 FAMILY OF SODIUM/PROTON EXCHANGERS	4.52402	4.91722	4.48261	NP_001246116.1
DS10_00011704	FBgn0263929	CG43162	jvl	Molecular function is unknown. Biological process: RNA localization; actin filament bundle assembly; oocyte microtubule cytoskeleton organization; oocyte nucleus localization involved in oocyte dorsal/ventral axis specification; chaeta morphogenesis; oocyte growth in germarium-derived egg chamber; dorsal appendage formation; oocyte localization involved in germarium-derived egg chamber formation.	javelin-like	4.52182	5.95754	5.21823	NP_001247105.1
DS10_00007661	FBgn0037186	CG11241	n/a	Molecular function: alanine-glyoxylate transaminase activity. Biological process is unknown.	Aminotransferase class-III, Pyridoxal phosphate-dependent transferase domain 1	4.51489	28.3195	13.5659	NP_730741.2
DS10_00001753	FBgn0028894	CG5869	GMF	Molecular function: actin binding. Biological process: gliogenesis.	Glia maturation factor, Actin-depolymerising factor homology domain	4.50902	43.7808	17.9714	XP_002089961.1
DS10_00010124	FBgn0039622	CG1442	eIF4E6	Molecular function: RNA 7-methylguanosine cap binding. Biological process: negative regulation of translation.	eukaryotic translation initiation factor 4E6, CYTOPLASMIC TRANSLATION INITIATION FACTORS	4.503	4.56567	4.25633	XP_002037139.1
DS10_00011292	FBgn0004396	CG7450	CrebA	Molecular function: sequence-specific DNA binding transcription factor activity; enhancer sequence-specific DNA binding; sequence-specific DNA binding; DNA binding. Biological process: dorsal/ventral pattern formation; chitin-based larval cuticle pattern formation; positive regulation of transcription from RNA polymerase II promoter; positive regulation of transcription, DNA-dependent; larval chi…	Cyclic-AMP response element binding protein , Basic-leucine zipper domain	4.49965	7.25481	5.99035	XP_001973097.1
DS10_00006768	FBgn0033302	CG8687	Cyp6a14	Molecular function: electron carrier activity. Biological process is unknown.	Cytochrome P450 superfamily	4.49835	8.59334	6.69534	XP_002089649.1
DS10_00010114	FBgn0261113	CG17836	Xrp1	Molecular function: protein dimerization activity. Biological process: olfactory behavior; cellular process; chromosome organization; imaginal disc-derived wing morphogenesis; negative regulation of cell proliferation.	n/a	4.49505	440.557	89.4268	XP_002096252.1
DS10_00001539	FBgn0286198	CG7144	LKRSDH	Molecular function: saccharopine dehydrogenase (NAD+, L-lysine-forming) activity. Biological process: regulation of histone methylation; histone arginine methylation.	Lysine ketoglutarate reductase/saccharopine dehydrogenase	4.48951	29.7399	14.0838	XP_002078547.1
DS10_00011016	FBgn0039081	CG4370	Irk2	Molecular function: inward rectifier potassium channel activity. Biological process: neuron projection morphogenesis; wing disc development; negative regulation of decapentaplegic signaling pathway; potassium ion transport; regulation of membrane potential.	Inwardly rectifying potassium channel 2, Immunoglobulin E-set	4.48386	15.8606	9.33664	XP_002104559.1
DS10_00001159	FBgn0039315	CG13658	n/a	Molecular function: transferase activity, transferring phosphorus-containing groups. Biological process is unknown.	ECDYSTEROID KINASE-LIKE	4.46992	44.7293	18.388	XP_002078357.1
DS10_00007478	FBgn0040153	CG32597	l(1)G0469	Molecular function is unknown. Biological process is unknown.	lethal (1) G0469	4.45878	37.5156	16.396	XP_001978193.1
DS10_00003882	FBgn0016081	CG32045	fry	Molecular function: protein binding. Biological process: single-organism developmental process; cellular component organization or biogenesis; biological regulation; post-embryonic organ morphogenesis; sensory organ development; regulation of neurogenesis; regulation of developmental process; appendage development; system development; neuron differentiation.	furry, Cell morphogenesis protein N-terminal	4.44546	25.0563	12.6804	XP_002093269.1
DS10_00013381	FBgn0031081	CG9565	Nep3	Molecular function: metallopeptidase activity; metalloendopeptidase activity. Biological process: proteolysis.	Neprilysin 3, Peptidase M13, C-terminal domain	4.43318	4.46104	4.24659	NP_523417.2
DS10_00013373	FBgn0040850	CG15210	n/a	Molecular function is unknown. Biological process is unknown.	n/a	4.43053	109.443	34.159	XP_001963488.1
DS10_00001491	FBgn0264815	CG44007	Pde1c	BlastP against D. melanogaster AA	Phosphodiesterase 1c	4.42844	2.96217	2.43671
DS10_00005496	FBgn0265194	CG44240	Trpm	Molecular function: metal ion transmembrane transporter activity. Biological process: divalent metal ion transport; cell growth; magnesium ion homeostasis; zinc ion homeostasis; mitochondrion organization.	Transient receptor potential cation channel, subfamily M	4.427	13.0436	8.47058	NP_001097320.1
DS10_00008044	FBgn0037408	CG1147	NPFR	Molecular function: neuropeptide F receptor activity. Biological process: larval feeding behavior.	Neuropeptide F receptor, GPCR, rhodopsin-like, 7TM	4.40664	1.79722	0.458109	AAK50050.1
DS10_00005127	FBgn0052808	CG32808	n/a	Molecular function: serine-type peptidase activity; serine-type endopeptidase activity. Biological process: proteolysis.	Serine proteases, trypsin domain	4.40652	4.74772	4.48421	CAA19843.2
DS10_00009359	FBgn0026563	CG1979	n/a	Molecular function is unknown. Biological process is unknown.	n/a	4.40486	1.92182	0.698428	XP_002096721.1
DS10_00008726	FBgn0038316	CG6276	n/a	Molecular function: DNA binding. Biological process is unknown.	MADF-BESS DOMAIN TRANSCRIPTION REGULATORS	4.40308	6.01319	5.44094	XP_001980034.1
DS10_00010988	FBgn0036896	CG8789	wnd	Molecular function: protein serine/threonine kinase activity. Biological process: Golgi organization; collateral sprouting of injured axon.	wallenda, NON-RECEPTOR TLK KINASES, Mitogen-activated protein kinase kinase kinase 12/13	4.39593	6.4432	5.71354	XP_002095586.1
DS10_00002210	FBgn0027073	CG4302	Ugt49B1	Molecular function: glucuronosyltransferase activity. Biological process: metabolic process.	UDP-glucuronosyl/UDP-glucosyltransferase	4.39279	39.1858	16.9604	XP_002039730.1
DS10_00012532	FBgn0028670	CG18617	Vha100-2	Molecular function: proton-transporting ATPase activity, rotational mechanism. Biological process: ATP hydrolysis coupled proton transport.	Vacuolar H+ ATPase 100kD subunit 2, VACUOLAR ATPASE V0 DOMAIN SUBUNITS	4.37883	212.498	54.761	NP_650722.1
DS10_00006295	FBgn0030331	CG15221	n/a	Molecular function: secondary active organic cation transmembrane transporter activity. Biological process: positive regulation of hemocyte proliferation.	Major facilitator superfamily	4.37613	3.38762	3.18519	XP_001977081.1
DS10_00012170	FBgn0004876	CG6027	cdi	Molecular function: protein serine/threonine kinase activity. Biological process: negative regulation of sevenless signaling pathway; embryonic development via the syncytial blastoderm; actin filament organization.	center divider, Negative Regulators of Sevenless Signaling Pathway, Protein kinase, ATP binding site	4.37536	16.4658	9.7166	XP_001866962.1
DS10_00008329	FBgn0040212	CG4625	Dhap-at	Molecular function: glycerone-phosphate O-acyltransferase activity; glycerol-3-phosphate O-acyltransferase activity. Biological process: phospholipid biosynthetic process.	Dihydroxyacetone phosphate acyltransferase, OTHER ACETYLTRANSFERASES COA HYDROLASES	4.37467	4.36016	4.21425	NP_001262957.1
DS10_00008739	FBgn0003429	CG10693	slo	Molecular function: protein binding; calcium-activated potassium channel activity. Biological process: male courtship behavior, veined wing generated song production; circadian rhythm; potassium ion transport; circadian behavior; response to drug.	slowpoke, SK AND SLO FAMILY POTASSIUM CHANNEL SUBUNITS	4.3639	3.79808	3.61121	NP_001262925.1
DS10_00004731	FBgn0030052	CG12065	n/a	Molecular function: catalytic activity. Biological process: lateral inhibition.	Nucleoside phosphorylase domain	4.35882	61.754	23.2773	XP_002101124.1
DS10_00006582	FBgn0259221	CG42321	ATP8A	Molecular function: ATPase activity, coupled to transmembrane movement of ions, phosphorylative mechanism. Biological process: cation transport; phospholipid transport.	ATPase 8A, PHOSPHOLIPID TRANSPORTING ATPASES	4.3449	27.2466	13.742	NP_725291.2
DS10_00005183	FBgn0025631	CG4322	moody	Molecular function: G-protein coupled receptor activity; melatonin receptor activity. Biological process: behavioral response to nicotine; establishment of glial blood-brain barrier; cortical actin cytoskeleton organization; behavioral response to ethanol; septate junction assembly; ventral cord development; behavioral response to cocaine.	CLASS A GPCR NEUROPEPTIDE AND PROTEIN HORMONE RECEPTORS	4.34031	9.46532	7.25599	NP_569970.2
DS10_00001051	FBgn0053511	CG33511	n/a	Molecular function: transferase activity, transferring phosphorus-containing groups. Biological process is unknown.	ECDYSTEROID KINASE-LIKE	4.32962	1.87579	0.683485	XP_002080111.1
DS10_00005208	FBgn0001404	CG9659	egh	Molecular function: beta-1,4-mannosyltransferase activity. Biological process: single-organism developmental process; multicellular organism reproduction; localization; cellular component organization or biogenesis; biological regulation; ovarian follicle cell development; gamete generation; multi-organism reproductive process; mating; cell fate commitment; establishment or maintenance of polarit…	egghead, OTHER MANNOSYLTRANSFERASES	4.32174	81.5395	27.717	NP_525052.1
DS10_00006782	FBgn0003892	CG2411	ptc	Molecular function: protein binding; hedgehog receptor activity; lipoprotein particle receptor activity. Biological process: single-organism developmental process; biological regulation; post-embryonic organ morphogenesis; system development; cellular component organization or biogenesis; sensory organ development; multicellular organism reproduction; instar larval or pupal morphogenesis; chemica…	patched, Negative Regulators of Hedgehog Signaling Pathway, UNCLASSIFIED TRANSMEMBRANE RECEPTORS	4.30957	2.00796	0.955595	XP_001970434.1
DS10_00006738	FBgn0050375	CG30375	n/a	Molecular function: serine-type endopeptidase activity. Biological process: proteolysis.	S1A SERINE PROTEASES - TRYPSIN-LIKE, Peptidase S1A, chymotrypsin family	4.30927	10.8427	7.83682	XP_002076241.1
DS10_00009630	FBgn0285955	CG34389	cv-c	Molecular function: GTPase activator activity. Biological process: single-organism developmental process; open tracheal system development; biological regulation; embryonic development via the syncytial blastoderm; digestive tract development; embryo development ending in birth or egg hatching; synaptic transmission; localization; post-embryonic organ morphogenesis; digestive system development.	crossveinless c, RHO GTPASE ACTIVATING PROTEINS	4.30495	3.72561	3.61524	XP_002013231.1
DS10_00012273	n/a	n/a	n/a	BlastP against D. melanogaster AA	n/a	4.29564	9.99044	7.53358
DS10_00012514	FBgn0038206	CG3172	twf	Molecular function: protein tyrosine kinase activity. Biological process: neuromuscular synaptic transmission; regulation of lamellipodium assembly; border follicle cell migration; synaptic vesicle endocytosis; actin filament depolymerization; chaeta morphogenesis; mushroom body development.	twinfilin, Actin-depolymerising factor homology domain	4.28603	6.79891	6.00453	XP_002097909.1
DS10_00002619	FBgn0033733	CG8834	n/a	Molecular function: 4-coumarate-CoA ligase activity. Biological process: metabolic process.	ACYL-COA SYNTHETASES, AMP-dependent synthetase-like superfamily	4.28376	337.498	75.9316	XP_002081186.1
DS10_00008149	FBgn0053523	CG33523	n/a	Molecular function: structural molecule activity. Biological process: neurogenesis.	Immunoglobulin-like fold, CRAL/TRIO, N-terminal domain superfamily	4.27771	36.6493	16.6984	XP_002093857.1
DS10_00011975	FBgn0003118	CG17077	pnt	Molecular function: protein binding; sequence-specific DNA binding RNA polymerase II transcription factor activity; RNA polymerase II core promoter proximal region sequence-specific DNA binding transcription factor activity involved in positive regulation of transcription; repressing transcription factor binding. Biological process: single-organism developmental process; biological regulation; op…	pointed, ETS DOMAIN TRANSCRIPTION FACTORS, Winged helix DNA-binding domain superfamily	4.27442	7.4792	6.35966	XP_002104541.1
DS10_00006008	FBgn0263997	CG43740	n/a	Molecular function is unknown. Biological process: lateral inhibition.	n/a	4.26724	1.60379	0.263844	XP_002101823.1
DS10_00004491	FBgn0035236	CG12004	n/a	Molecular function: carbohydrate binding. Biological process: synaptic target recognition.	Organic solute transporter subunit alpha/Transmembrane protein 184	4.26669	37.1416	16.8381	NP_001097474.1
DS10_00010126	FBgn0042111	CG18766	n/a	Molecular function is unknown. Biological process is unknown.	Myb/SANT-like DNA-binding domain-containing protein	4.26011	16.8609	10.0779	NP_652657.1
DS10_00006401	FBgn0030447	CG2200	n/a	Molecular function: dipeptidase activity. Biological process: proteolysis.	S51 SERINE DIPEPTIDASES, Class I glutamine amidotransferase-like	4.25501	50.0599	20.5463	XP_002100419.1
DS10_00010874	FBgn0036336	CG11268	ste14	Molecular function: protein C-terminal S-isoprenylcysteine carboxyl O-methyltransferase activity. Biological process: C-terminal protein methylation.	isoprenylcysteine carboxylmethyltransferase	4.2479	13.61	8.93402	XP_001972613.1
DS10_00000891	FBgn0005771	CG4491	noc	Molecular function: protein binding. Biological process: inter-male aggressive behavior; wing disc development; eye-antennal disc development; cell proliferation; ocellus development; negative regulation of gene expression; brain development; leg disc development; open tracheal system development.	no ocelli, C2H2 ZINC FINGER TRANSCRIPTION FACTORS	4.23618	6.3348	5.81022	XP_002089296.1
DS10_00007150	FBgn0052243	CG32243	n/a	Molecular function is unknown. Biological process is unknown.	Domain of unknown function DUF4781	4.23105	3.51855	3.47602	XP_002093723.1
DS10_00000818	FBgn0032881	CG9319	Amacr	Molecular function: alpha-methylacyl-CoA racemase activity. Biological process: metabolic process.	Alpha-methylacyl-CoA racemase, CoA-transferase family III	4.22314	6.17795	5.75601	XP_002091246.1
DS10_00011958	FBgn0038095	CG7241	Cyp304a1	Molecular function: electron carrier activity. Biological process: insecticide metabolic process.	Cytochrome P450 superfamily	4.21695	2.06226	1.15245	XP_002097455.1
DS10_00011203	FBgn0038652	CG7720	n/a	Molecular function: sodium:iodide symporter activity. Biological process: transmembrane transport.	Sodium/glucose symporter superfamily	4.21632	33.2334	15.8521	XP_002102908.1
DS10_00012286	FBgn0036801	CG6896	MYPT-75D	Molecular function: protein phosphatase 1 binding; myosin phosphatase regulator activity. Biological process: imaginal disc-derived wing morphogenesis.	Myosin phosphatase targeting subunit 75D, Ankyrin repeat	4.21417	14.7581	9.37459	XP_002042600.1
DS10_00003058	FBgn0041205	CG16910	key	Molecular function: protein binding. Biological process: immune response; defense response to Gram-negative bacterium; positive regulation of antibacterial peptide biosynthetic process; defense response to virus; protein catabolic process.	kenny, Imd Signaling Pathway Core Components, NEMO, Zinc finger	4.21281	97.2165	32.4099	XP_002092894.1
DS10_00002405	FBgn0033679	CG8888	n/a	Molecular function: oxidoreductase activity, acting on CH-OH group of donors. Biological process: metabolic process.	STEROID DEHYDROGENASES, NAD(P)-binding domain superfamily	4.21087	12.2486	8.50967	XP_001975990.1
DS10_00010425	n/a	n/a	n/a	BlastP against D. melanogaster AA	n/a	4.20717	7.31074	6.3614
DS10_00007329	FBgn0030739	CG13957	SWIP	Molecular function is unknown. Biological process is unknown.	Strumpellin and WASH-interacting protein, WASH complex subunit 7, N-terminal	4.20476	4.63759	4.63132	XP_001977961.1
DS10_00011620	FBgn0038928	CG12297	Fadd	Molecular function: protein binding; CARD domain binding. Biological process: immune response; activation of cysteine-type endopeptidase activity involved in apoptotic process; sperm individualization; defense response to Gram-negative bacterium; peptidoglycan recognition protein signaling pathway.	Fas-associated death domain, Imd Signaling Pathway Core Components, Death domain	4.19802	5.91163	5.61767	XP_002098236.1
DS10_00012200	FBgn0038150	CG17045	yellow-e3	Molecular function is unknown. Biological process is unknown.	Major royal jelly protein/protein yellow	4.19354	2.99179	2.81847	XP_002097530.1
DS10_00013208	FBgn0038897	CG5849	n/a	Molecular function: aminopeptidase activity. Biological process: proteolysis.	M1 METALLOPEPTIDASES, Peptidase M1, alanine aminopeptidase/leukotriene A4 hydrolase	4.19228	4.19455	4.26451	XP_002098182.1
DS10_00011251	FBgn0039226	CG18410	Ude	Molecular function: RNA binding; DNA binding. Biological process: pupation; DNA catabolic process.	Uracil-DNA degrading factor	4.18715	5.48149	5.29573	AAK93110.1
DS10_00012104	FBgn0015577	CG1128	α-Est9	Molecular function: carboxylesterase activity. Biological process is unknown.	α-Esterase-9, Cholinesterase	4.18588	9.95404	7.63035	XP_001953254.1
DS10_00001979	FBgn0010497	CG5304	dmGlut	Molecular function: sodium-dependent phosphate transmembrane transporter activity; high-affinity glutamate transmembrane transporter activity. Biological process: sodium-dependent phosphate transport; L-glutamate import; glutamine metabolic process; mitochondrion organization.	Dietary and metabolic glutamate transporter, Major facilitator superfamily	4.18249	87.9686	30.116	XP_002079174.1
DS10_00005234	FBgn0000377	CG3193	crn	Molecular function is unknown. Biological process: oenocyte development; centrosome duplication; Malpighian tubule morphogenesis; glial cell migration; axon ensheathment; regulation of alternative mRNA splicing, via spliceosome; neurogenesis.	crooked neck, SPLICEOSOME COMPLEX B, HAT (Half-A-TPR) repeat	4.18231	54.9742	22.116	XP_002100281.1
DS10_00000252	FBgn0003716	CG14026	tkv	Molecular function: transforming growth factor beta receptor activity, type I; transforming growth factor beta binding. Biological process: biological regulation; single-organism developmental process; regulation of developmental process; post-embryonic organ morphogenesis; regionalization; system development; synaptic transmission; multicellular organism reproduction; cellular component organiza…	thickveins, BMP Signaling Pathway Core Components, Serine/threonine-protein kinase, active site	4.17042	22.0715	12.176	NP_787992.1
DS10_00011810	FBgn0036813	CG6877	Atg3	Molecular function is unknown. Biological process: autophagy.	Autophagy-related 3, ATG8 TRANSFERASES	4.16704	37.4171	17.2178	XP_002094869.1
DS10_00008950	FBgn0051133	CG31133	Slimp	Molecular function: tRNA binding. Biological process: cellular respiration; mitochondrion morphogenesis.	Seryl-tRNA synthetase-like insect mitochondrial protein, Class I and II aminoacyl-tRNA synthetase, tRNA-binding arm	4.16425	2.55072	2.16042	XP_002104667.1
DS10_00005538	FBgn0034035	CG8207	n/a	Molecular function: mannose-1-phosphate guanylyltransferase activity. Biological process: biosynthetic process.	OTHER NUCLEOTIDYLTRANSFERASES, Hexapeptide repeat	4.15762	129.394	41.0701	XP_002034001.1
DS10_00012891	FBgn0261238	CG1070	Alh	Molecular function: sequence-specific DNA binding transcription factor activity. Biological process: instar larval development; regulation of transcription, DNA-dependent; haltere development; molting cycle, chitin-based cuticle.	Alhambra, Zinc finger, PHD-type, conserved site	4.14867	12.0956	8.53697	NP_001097698.1
DS10_00012235	FBgn0263929	CG43162	jvl	Molecular function is unknown. Biological process: RNA localization; actin filament bundle assembly; oocyte microtubule cytoskeleton organization; oocyte nucleus localization involved in oocyte dorsal/ventral axis specification; chaeta morphogenesis; oocyte growth in germarium-derived egg chamber; dorsal appendage formation; oocyte localization involved in germarium-derived egg chamber formation.	javelin-like	4.14867	7.74472	6.64289	NP_001247105.1
DS10_00001210	FBgn0045852	CG31753	ham	Molecular function: sequence-specific DNA binding transcription factor activity. Biological process: regulation of dendrite morphogenesis; regulation of transcription, DNA-dependent; sensory organ development; neuron development.	hamlet, C2H2 ZINC FINGER TRANSCRIPTION FACTORS, Zinc finger C2H2 superfamily	4.12639	1.65471	0.457743	XP_002090612.1
DS10_00009000	FBgn0030955	CG6891	n/a	Molecular function: actin binding. Biological process is unknown.	Actin-depolymerising factor homology domain	4.11372	269.428	67.2852	NP_728196.1
DS10_00002491	FBgn0050069	CG30069	n/a	Molecular function is unknown. Biological process is unknown.	Stabilizer of axonemal microtubules 1/2	4.10908	7.681	6.69085	NP_610937.4
DS10_00008096	FBgn0262022	CG42833	n/a	Molecular function is unknown. Biological process is unknown.	n/a	4.10747	2.81903	2.66472	NP_001189138.1
DS10_00010670	FBgn0262022	CG42833	n/a	Molecular function is unknown. Biological process is unknown.	n/a	4.10747	2.81903	2.66472	NP_001189138.1
DS10_00011603	FBgn0051272	CG31272	n/a	Molecular function: lipase activity; transporter activity. Biological process: transport; lipid metabolic process.	Major facilitator superfamily	4.10436	5.70077	5.59578	NP_001262466.1
DS10_00010458	FBgn0038432	CG14883	n/a	Molecular function: glycerophosphodiester phosphodiesterase activity. Biological process: neuron projection morphogenesis.	PLC-like phosphodiesterase, TIM beta/alpha-barrel domain superfamily, OTHER PHOSPHORIC DIESTER HYDROLASES	4.10367	7.14765	6.42062	NP_650547.1
DS10_00002097	FBgn0034729	CG10344	n/a	Molecular function: protein-cysteine S-palmitoleyltransferase activity. Biological process: protein palmitoylation.	PALMITOYLTRANSFERASES, Palmitoyltransferase, DHHC domain	4.101	11.5971	8.43169	XP_001975203.1
DS10_00012237	FBgn0266756	CG44012	btsz	Molecular function: transporter activity. Biological process: morphogenesis of embryonic epithelium; establishment of planar polarity of embryonic epithelium; positive regulation of cell size; apical junction assembly; gastrulation involving germ band extension; actin filament organization; positive regulation of multicellular organism growth.	bitesize, SYNAPTOTAGMINS & SYNAPTOTAGMIN-LIKE PROTEINS, Zinc finger, FYVE/PHD-type	4.10029	7.01068	6.34708	NP_001097794.1
DS10_00008935	FBgn0261401	CG42642	Ir75c	Molecular function: ligand-gated ion channel activity. Biological process: detection of chemical stimulus involved in sensory perception.	Ionotropic receptor 75c, ANTENNAL IONOTROPIC RECEPTORS, Ionotropic glutamate receptor	4.10001	2.81153	2.6559	XP_002094962.1
DS10_00013420	FBgn0041096	CG32096	rols	Molecular function: protein binding. Biological process: myoblast fusion; anterior Malpighian tubule development; border follicle cell migration.	rolling pebbles, Ankyrin repeat, P-loop containing nucleoside triphosphate hydrolase	4.09975	2.1406	1.50054	NP_729780.1
DS10_00013346	FBgn0036765	CG7408	n/a	Molecular function: N-acetylgalactosamine-4-sulfatase activity. Biological process: defense response to bacterium.	OTHER SULFURIC ESTER HYDROLASES, Alkaline-phosphatase-like, core domain superfamily	4.08956	2.87231	2.77861	NP_649020.1
DS10_00008927	FBgn0036765	CG7408	n/a	Molecular function: N-acetylgalactosamine-4-sulfatase activity. Biological process: defense response to bacterium.	OTHER SULFURIC ESTER HYDROLASES, Alkaline-phosphatase-like, core domain superfamily	4.08934	2.98947	2.95695	NP_649020.1
DS10_00003659	FBgn0029118	CG10622	ScsβG	Molecular function: succinate-CoA ligase (GDP-forming) activity. Biological process: tricarboxylic acid cycle.	Succinyl-coenzyme A synthetase β subunit, GDP-forming, Succinyl-CoA synthetase-like	4.0889	31.2265	15.7235	XP_002083739.1
DS10_00006345	FBgn0052640, FBgn0052641	CG32640, CG32641	n/a	Molecular function is unknown. Biological process: response to heat.	HEAT SHOCK PROTEIN 40/DNAJ CO-CHAPERONES, Chaperone J-domain superfamily	4.08756	24.0561	13.2645	XP_002100436.1
DS10_00008125	FBgn0035632	CG10575	Ppat-Dpck	Molecular function: pantetheine-phosphate adenylyltransferase activity; dephospho-CoA kinase activity. Biological process: triglyceride homeostasis; cytoplasmic transport, nurse cell to oocyte; imaginal disc-derived wing morphogenesis; ovarian follicle cell migration.	Bifunctional Phosphopantetheine adenylyltransferase - Dephospho-CoA kinase	4.08726	23.1192	12.9329	XP_002093825.1
DS10_00009555	FBgn0039790	CG2246	n/a	Molecular function: ribose phosphate diphosphokinase activity. Biological process: nucleotide biosynthetic process.	Phosphoribosyltransferase domain	4.07374	4.5998	4.77326	NP_001263117.1
DS10_00011385	FBgn0039313	CG11892	n/a	Molecular function: transferase activity, transferring phosphorus-containing groups. Biological process is unknown.	ECDYSTEROID KINASE-LIKE	4.07327	99.6822	34.1072	XP_001981824.1
DS10_00008851	FBgn0036568	CG5389	ATPsynβL	Molecular function: hydrogen-exporting ATPase activity, phosphorylative mechanism. Biological process: regulation of proton transport; determination of adult lifespan.	ATP synthase, β subunit-like	4.06871	1.38497	0.015385	XP_002086515.1
DS10_00008208	FBgn0029831	CG5966	n/a	Molecular function: triglyceride lipase activity. Biological process: imaginal disc-derived wing morphogenesis.	OTHER CARBOXYLESTERASES, Lipase/vitellogenin	4.04955	17.3478	10.6283	XP_002101336.1
DS10_00009626	FBgn0024321	CG8524	NK7.1	Molecular function: sequence-specific DNA binding transcription factor activity. Biological process: regulation of transcription, DNA-dependent.	NK-LIKE HOMEOBOX TRANSCRIPTION FACTORS, Homeobox-like domain superfamily	4.04615	3.14024	3.22858	XP_002097873.1
DS10_00001215	FBgn0032713	CG17323	Ugt36D1	Molecular function: glucuronosyltransferase activity. Biological process: inter-male aggressive behavior.	UDP-glucuronosyl/UDP-glucosyltransferase	4.04597	7.79033	6.81135	ADH29876.1
DS10_00007341	FBgn0030731	CG3415	Mfe2	Molecular function: enoyl-CoA hydratase activity; 3R-hydroxyacyl-CoA dehydratase activity; protein homodimerization activity. Biological process: fatty acid beta-oxidation using acyl-CoA oxidase.	peroxisomal Multifunctional enzyme type 2, Short-chain dehydrogenase/reductase, conserved site	4.03979	216.996	59.5205	XP_002100784.1
DS10_00008130	FBgn0035636	CG10546	Cralbp	Molecular function: retinal binding. Biological process: transport.	Cellular retinaldehyde binding protein, CRAL-TRIO lipid binding domain superfamily	4.035	4.11864	4.38282	XP_001957508.1
DS10_00005291	FBgn0025640	CG13369	n/a	Molecular function: ribokinase activity. Biological process: D-ribose metabolic process.	Carbohydrate/purine kinase, PfkB, conserved site	4.02608	66.995	26.1428	XP_001982409.1
DS10_00004603	FBgn0035137	CG1233	n/a	Molecular function: zinc ion binding; nucleic acid binding. Biological process is unknown.	C2H2 ZINC FINGER TRANSCRIPTION FACTORS, Zinc finger C2H2 superfamily	4.02592	10.494	8.11315	XP_002093005.1
DS10_00007754	FBgn0053208	CG33208	Mical	Molecular function: actin binding; NADPH:sulfur oxidoreductase activity. Biological process: axon guidance; dendrite morphogenesis; actin filament depolymerization; neuron remodeling; sulfur oxidation; sarcomere organization; NADPH oxidation.	Molecule interacting with CasL, FAD/NAD(P)-binding domain superfamily	4.02489	3.722	3.93429	XP_002104037.1
DS10_00004198	FBgn0263973	CG32397	jv	Molecular function is unknown. Biological process: parallel actin filament bundle assembly; chaeta morphogenesis.	javelin (jv) encodes an actin associated protein with roles in actin organization during bristle growth	4.02115	2.47235	2.22231	NP_001246649.1
DS10_00009732	FBgn0038475	CG3962	Keap1	Molecular function: actin binding. Biological process: response to oxidative stress.	Keap1 (Keap1) encodes a protein that interacts with the product of cnc to regulate the activation of genes by oxidative stress.	4.01289	13.0528	9.13046	XP_002103108.1
DS10_00009605	FBgn0037705	CG9381	mura	Molecular function: zinc ion binding. Biological process: olfactory learning; learning or memory; long-term memory; regulation of response to DNA damage stimulus; behavioral response to ethanol.	murashka, Zinc finger, RING/FYVE/PHD-type, OTHER RING DOMAIN UBIQUITIN LIGASES	4.00934	3.46897	3.67197	AEQ94064.1
DS10_00003351	FBgn0053774	CG33774	n/a	BlastP against D. melanogaster AA	OLIGOSACCHARYLTRANSFERASE COMPLEX SUBUNITS, Oligosaccaryltransferase	4.00913	32.4118	16.294	NP_001027396.1
DS10_00000388	FBgn0261020	CG7870	wol	Molecular function: dolichyl-phosphate beta-glucosyltransferase activity. Biological process: Golgi organization; chitin-based cuticle development; segment specification; protein O-linked glycosylation; endoplasmic reticulum organization; protein N-linked glycosylation; embryonic pattern specification; septate junction assembly; plasma membrane organization.	wollknaeuel (wol) encodes a protein belonging to the the glycosyltransferase 2 family. It contributes to N-glycan biosynthesis and is involved in epidermal differentiation including maintenance of cell polarity and cuticle formation	4.00726	46.16	20.5255	XP_002078620.1
DS10_00006184	FBgn0027528	CG9634	goe	Molecular function: metalloendopeptidase activity. Biological process: proteolysis.	gone early (goe) encodes a non-peptidase homolog of Neprilysin (M13) family metalloendopeptidases.	4.00423	41.201	19.1154	XP_001977485.1
DS10_00001084	FBgn0261671	CG42555	tweek	Molecular function is unknown. Biological process: synaptic vesicle endocytosis.	tweek (tweek) encodes a protein involved in the endocytosis of synaptic vesicles.	3.99426	5.46691	5.56555	NP_001188826.2
DS10_00008466	FBgn0032456	CG6214	MRP	BlastP against D. melanogaster AA	Multidrug-Resistance like Protein 1, ABC transporter type 1, transmembrane domain superfamily	3.98646	57.2103	23.7447	XP_002079260.1
DS10_00004134	FBgn0000592	CG6917	Est-6	Molecular function: carboxylesterase activity. Biological process: pheromone biosynthetic process; courtship behavior; multicellular organism reproduction.	Carboxylesterase type B, conserved site	3.98547	48.5622	21.145	XP_002000526.1
DS10_00008428	FBgn0260003	CG34157	Dys	BlastP against D. melanogaster AA	Dystrophin (Dys) encodes a cytoplasmic protein that connects the actin cytoskeleton to the extracellular matrix via the receptor encoded by Dg. Actinin-type actin-binding domain, conserved site	3.98377	6.54215	6.21788	NP_001036727.1
DS10_00012646	FBgn0038889	CG7922	Fancm	Molecular function: helicase activity; ATP-dependent RNA helicase activity. Biological process is unknown.	Fanconi anemia group M helicase, Helicase superfamily 1/2, ATP-binding domain	3.98124	4.84566	5.07158	XP_002096570.1
DS10_00012736	FBgn0039430	CG5455	n/a	Molecular function is unknown. Biological process is unknown.	Alpha/Beta hydrolase fold	3.95883	25.032	14.1028	NP_651481.1
DS10_00002449	FBgn0040491	CG8238	Buffy	Molecular function is unknown. Biological process: negative regulation of apoptotic process; positive regulation of programmed cell death.	Buffy (Buffy) encodes one of the two Bcl-2 family members in Drosophila	3.95722	17.6099	10.9065	NP_523702.1
DS10_00001196	FBgn0086909	CG31751	n/a	Molecular function: transferase activity, transferring phosphorus-containing groups. Biological process is unknown.	Aminoglycoside phosphotransferase	3.95558	33.3947	16.7424	XP_002079811.1
DS10_00000730	FBgn0031322	CG5001	n/a	Molecular function: unfolded protein binding. Biological process: response to heat.	HEAT SHOCK PROTEIN 40/DNAJ CO-CHAPERONES	3.94198	14.8826	9.93294	XP_002064911.1
DS10_00000228	FBgn0261560	CG8846	Thor	Molecular function: eukaryotic initiation factor 4E binding. Biological process: response to starvation; immune response; determination of adult lifespan; response to oxidative stress; regulation of cell growth; triglyceride metabolic process; negative regulation of cell size; response to stress; antibacterial humoral response; regulation of mitochondrial translation.	Thor (Thor) encodes a eukaryotic translation initiation factor 4E binding protein	3.93778	1093.99	249.441	XP_002087834.1
DS10_00013517	FBgn0035515	CG14997	n/a	Molecular function: oxidoreductase activity. Biological process: oxidation-reduction process.	OTHER SULFUR OXIDOREDUCTASES, FAD/NAD(P)-binding domain	3.93599	14.8638	9.93949	XP_002093671.1
DS10_00011431	FBgn0036493	CG7255	n/a	Molecular function: amino acid transmembrane transporter activity; cationic amino acid transmembrane transporter activity. Biological process: amino acid transmembrane transport.	Amino acid/polyamine transporter I	3.93091	14.4963	9.78034	XP_002095147.1
DS10_00012354	FBgn0036777	CG7341	n/a	Molecular function is unknown. Biological process is unknown.	n/a	3.92527	11.2697	8.59015	NP_649029.1
DS10_00006009	FBgn0263997	CG43740	n/a	Molecular function is unknown. Biological process: lateral inhibition.	n/a	3.91979	1.5956	0.518801	XP_002041855.1
DS10_00003333	FBgn0262515	CG8029	VhaAC45	Molecular function: hydrogen ion transporting ATP synthase activity, rotational mechanism; proton-transporting ATPase activity, rotational mechanism. Biological process: ATP hydrolysis coupled proton transport.	Vacuolar H+ ATPase AC45 accessory subunit	3.91392	953.485	225.077	XP_002080734.1
DS10_00001749	FBgn0001992	CG4163	Cyp303a1	Molecular function: electron carrier activity. Biological process: sensory organ development.	Cytochrome P450 superfamily	3.91105	1.65096	0.640652	XP_002038149.1
DS10_00002842	FBgn0033543	CG12338	n/a	Molecular function: D-aspartate oxidase activity. Biological process: oxidation-reduction process.	D-amino-acid oxidase	3.91068	51.6783	22.5627	XP_002080943.1
DS10_00012443	FBgn0028487	CG9611	f-cup	Molecular function is unknown. Biological process: Ras protein signal transduction.	flyers-cup, Leucine-rich repeat	3.90976	3.65852	4.03957	XP_002097562.1
DS10_00008824	FBgn0036833	CG3819	n/a	Molecular function: metal ion binding; hydrolase activity; nucleic acid binding. Biological process is unknown.	DNA/RNA non-specific endonuclease	3.90406	100.919	35.7217	NP_649078.1
DS10_00013229	FBgn0037534	CG2781	ELOVL	Molecular function: 1,3-beta-D-glucan synthase activity; fatty acid elongase activity. Biological process: very long-chain fatty acid biosynthetic process; fatty acid elongation.	ELOVL fatty acid elongase	3.90254	11.7915	8.87084	XP_001979245.1
DS10_00013534	FBgn0038221	CG3259	IFT54	Molecular function: microtubule binding. Biological process: cilium assembly.	Intraflagellar transport 54, TRAF3-interacting protein 1, N-terminal domain superfamily	3.90185	1.39709	0.143787	XP_001979911.1
DS10_00010299	FBgn0037671	CG8444	ATP6AP2	Molecular function: frizzled-2 binding; frizzled binding. Biological process: Wnt receptor signaling pathway; imaginal disc-derived wing hair organization; Wnt receptor signaling pathway, planar cell polarity pathway.	ATPase H+ transporting accessory protein 2, Renin receptor-like	3.90013	503.731	113.283	XP_002031928.1
DS10_00007873	FBgn0053160 + FBgn0052277 + FBgn0053159 + FBgn0052271 + FBgn0052270 + FBgn0052269	CG33160 + CG32277 + CG33159 + CG32271 + CG32270 + CG32269	n/a	BlastP against D. melanogaster AA	n/a	3.88804	2.47326	2.39561	XP_001353466.2
DS10_00011705	FBgn0038262	CG14857	n/a	Molecular function: secondary active organic cation transmembrane transporter activity. Biological process: transmembrane transport.	Major facilitator superfamily	3.88289	2.17076	1.83816	AAY55258.1
DS10_00010360	FBgn0038886	CG6475	Ugt49B2	Molecular function: glucuronosyltransferase activity. Biological process: metabolic process.	UDP-glucuronosyl/UDP-glucosyltransferase	3.87756	3.29578	3.60753	NP_001097859.4
DS10_00013295	FBgn0037975 + FBgn0037973	CG3397 + CG18547	n/a	Molecular function: oxidoreductase activity. Biological process: potassium ion transport.	Aldo/keto reductase	3.85562	105.939	37.9425	XP_002103789.1
DS10_00006208	FBgn0030653	CG7860	n/a	Molecular function: asparaginase activity. Biological process: autophagic cell death; salivary gland cell autophagic cell death.	Asparaginase-like 1, metazoa	3.84827	26.2321	14.978	XP_002100680.1
DS10_00000584	FBgn0031478	CG8814	n/a	Molecular function: diazepam binding; enzyme inhibitor activity; fatty-acyl-CoA binding. Biological process: cellular acyl-CoA homeostasis.	Acyl-CoA-binding protein, ACBP	3.84137	26.0058	14.9115	XP_001968486.1
DS10_00006762	FBgn0033297	CG8690	Mal-A8	Molecular function: alpha-glucosidase activity. Biological process: carbohydrate metabolic process.	Maltase A8, Glycoside hydrolase superfamily	3.8404	96.7897	35.3938	NP_995779.2
DS10_00007801	FBgn0052369	CG32369	n/a	Molecular function: ATP-dependent peptidase activity; zinc ion binding. Biological process: proteolysis.	Lon, substrate-binding domain, Tetratricopeptide-like helical domain superfamily	3.83255	2.37748	2.30905	XP_001971402.1
DS10_00008771	FBgn0038396	CG5013	n/a	Molecular function is unknown. Biological process is unknown.	Lysine methyltransferase	3.82341	4.1008	4.62645	NP_650520.1
DS10_00001718	FBgn0004406	CG8987	PolG1	Molecular function: DNA-directed DNA polymerase activity. Biological process: DNA-dependent DNA replication.	DNA polymerase gamma subunit 1, DNA/RNA polymerase superfamily	3.82301	27.4452	15.5242	AAC47658.1
DS10_00012329	FBgn0036801	CG6896	MYPT-75D	Molecular function: protein phosphatase 1 binding; myosin phosphatase regulator activity. Biological process: imaginal disc-derived wing morphogenesis.	Myosin phosphatase targeting subunit 75D, Ankyrin repeat	3.82171	22.2222	13.2695	XP_002085387.1
DS10_00013358	FBgn0038079	CG14394	NijC	BlastP against D. melanogaster AA	Ninjurin C	3.81651	2.40677	2.3787	XP_002031422.1
DS10_00011523	FBgn0036321	CG14120	n/a	Molecular function: metal ion binding; hydrolase activity; nucleic acid binding. Biological process is unknown.	DNA/RNA non-specific endonuclease	3.81055	2.04369	1.60179	XP_002094644.1
DS10_00006940	FBgn0266098	CG44835	rg	Molecular function: protein kinase A binding. Biological process: olfactory learning; protein localization; compound eye cone cell differentiation; neuromuscular junction development; mushroom body development.	rugose, lectin/glucanase domain superfamily, rugose (rg) encodes a protein involved in synaptic architecture, brain morphology and associative learning	3.81026	7.81523	7.17489	NP_001138159.2
DS10_00012588	FBgn0038038	CG5167	Sccpdh2	Molecular function: nucleotide binding; oxidoreductase activity. Biological process: oxidation-reduction process.	Saccheropin dehydrogenase 2, NAD(P)-binding domain superfamily	3.80971	58.1006	25.0104	XP_001358029.2
DS10_00003765	FBgn0001168	CG6494	h	Molecular function: RNA polymerase II core promoter proximal region sequence-specific DNA binding transcription factor activity involved in negative regulation of transcription; RNA polymerase II core promoter proximal region sequence-specific DNA binding; protein binding; transcription factor binding; E-box binding; DNA binding. Biological process: response to hypoxia; tube morphogenesis; regula…	hairy, Helix-loop-helix DNA-binding domain superfamily	3.80787	23.4013	13.8878	XP_002093420.1
DS10_00002824	FBgn0033526	CG12892	Caf1-105	Molecular function: DNA binding. Biological process: chromatin assembly or disassembly.	Chromatin assembly factor 1, p105 subunit, WD40/YVTN repeat-like-containing domain superfamily	3.80623	77.4503	29.9256	XP_002080917.1
DS10_00013331	FBgn0010040	CG11512	GstD	BlastP against D. melanogaster AA (4 GSTs)	Glutathione S transferase	3.80484	35.1694	17.9293	XP_001844244.1
DS10_00000150	FBgn0031562	CG3604	n/a	Molecular function: serine-type endopeptidase inhibitor activity. Biological process is unknown.	Pancreatic trypsin inhibitor Kunitz domain	3.79145	27.2642	15.5588	XP_002087862.1
DS10_00006607	FBgn0033809	CG4630	n/a	Molecular function: carnitine transmembrane transporter activity. Biological process: transmembrane transport.	Major facilitator, sugar transporter-like	3.78751	12.8328	9.42192	XP_002090938.1
DS10_00009834	FBgn0037293	CG12007	n/a	Molecular function: Rab geranylgeranyltransferase activity. Biological process: regulation of cell shape; cell adhesion; neurogenesis.	Geranylgeranyl transferase type-2 subunit alpha	3.78396	10.4193	8.43295	XP_002102171.1
DS10_00005968	FBgn0029994	CG2254	Ldsdh1	Molecular function: nucleotide binding; oxidoreductase activity. Biological process: metabolic process.	Lipid droplet subset dehydrogenase 1, NAD(P)-binding domain superfamily	3.77998	244.797	67.6545	XP_002101196.1
DS10_00008421	FBgn0283536	CG6213	Vha13	Molecular function: hydrolase activity, acting on acid anhydrides, catalyzing transmembrane movement of substances. Biological process: embryonic development via the syncytial blastoderm.	Vacuolar H+ ATPase 13kD subunit, Vacuolar (H+)-ATPase G subunit	3.77909	2579.31	653.473	XP_001953128.1
DS10_00005624	FBgn0033127 + FBgn0033128 + FBgn0033129 + FBgn0033130	CG12845 + CG12142 + CG12844 + CG12843	Tsp42Ef	BlastP against D. melanogaster AA	Tetraspanin 42Ef + 42Eg + 42Eh + 42Ei, Tetraspanin	3.77823	15.2593	10.3796	XP_002080373.1
DS10_00005055	FBgn0029859	CG15892	n/a	Molecular function is unknown. Biological process is unknown.	n/a	3.77393	4.9048	5.43485	XP_001978433.1
DS10_00012003	FBgn0038810	CG5434	Srp72	Molecular function: 7S RNA binding. Biological process: dsRNA transport.	Signal recognition particle 72, Tetratricopeptide-like helical domain superfamily	3.77174	3.2326	3.66397	XP_001979412.1
DS10_00002032	FBgn0034460	CG18367	n/a	Molecular function is unknown. Biological process is unknown.	Helix-turn-helix domain (DUF4817)	3.76199	3.64666	4.26223	NP_663311.1
DS10_00003966	FBgn0026160	CG7958	tna	Molecular function: zinc ion binding. Biological process: chromatin-mediated maintenance of transcription.	tonalli, Zinc finger, MIZ-type	3.75996	3.09755	3.52066	NP_648413.1
DS10_00010018	FBgn0265140	CG7649	Meltrin	Molecular function: identical protein binding; metalloendopeptidase activity. Biological process: membrane protein ectodomain proteolysis; protein oligomerization.	ADAM, cysteine-rich domain, ADAM METALLOPROTEASES	3.75846	2.81981	3.17235	XP_002097837.1
DS10_00012993	FBgn0038869	CG3353	Smyd5	Molecular function: zinc ion binding. Biological process is unknown.	SET and MYND domain containing, class 5, Armadillo-type fold	3.75742	7.28224	6.97372	XP_002096523.1
DS10_00009942	FBgn0265042	CG44159	Irk1	Molecular function: inward rectifier potassium channel activity. Biological process: wing disc development; potassium ion transport; regulation of membrane potential; locomotor rhythm.	Inwardly rectifying potassium channel 1, Potassium channel, inwardly rectifying, Kir, cytoplasmic	3.75591	34.9588	18.0241	XP_002098397.1
DS10_00001063	FBgn0032923	CG9248	Pld3	Molecular function: catalytic activity. Biological process: metabolic process.	Phospholipase D family member 3, Phospholipase D/Transphosphatidylase	3.75465	134.935	46.1155	NP_610093.1
DS10_00003292	FBgn0024315	CG8098	Picot	Molecular function: high affinity inorganic phosphate:sodium symporter activity. Biological process: phosphate ion transport.	Na-dependent inorganic phosphate cotransporter	3.74917	71.0528	28.6911	NP_725600.1
DS10_00006816	FBgn0024238	CG8649	Fim	Molecular function: actin binding. Biological process: female meiosis chromosome segregation.	Fimbrin (Fim) encodes an actin-binding protein involved in chromosome segregation	3.74908	202.938	61.2836	XP_002042372.1
DS10_00002315	FBgn0034951	CG3860	n/a	Molecular function: oxysterol binding. Biological process is unknown.	Oxysterol-binding protein	3.74155	36.0242	18.5443	XP_002082897.1
DS10_00004755	FBgn0031042	CG14221	n/a	Molecular function: protein disulfide oxidoreductase activity; electron carrier activity. Biological process: glycerol ether metabolic process; cell redox homeostasis.	Domain of unknown function DUF4746	3.72916	2.10529	1.87297	XP_002077119.1
DS10_00001334	FBgn0032934 + FBgn0032935	CG8679 + CG8678	n/a + Atg18b	BlastP against D. melanogaster AA	Autophagy-related 18b, WD40/YVTN repeat-like-containing domain superfamily	3.7283	4.87137	5.47153	NP_610099.1
DS10_00010526	FBgn0004852	CG7978	Ac76E	Molecular function: adenylate cyclase activity. Biological process: cyclic nucleotide biosynthetic process; intracellular signal transduction.	Adenylyl cyclase 76E, Adenylyl cyclase class-4/guanylyl cyclase, conserved site	3.72801	4.1203	4.80161	XP_001973409.1
DS10_00012774	FBgn0001941	CG9078	ifc	Molecular function: sphingolipid delta-4 desaturase activity. Biological process: spindle assembly involved in male meiosis; spermatogenesis.	infertile crescent, Fatty acid desaturase domain	3.72316	863.944	207.674	XP_001962723.1
DS10_00012419	FBgn0052179	CG32179	Krn	Molecular function: growth factor activity; epidermal growth factor receptor binding. Biological process: border follicle cell migration; positive regulation of cell proliferation; MAPK cascade; compound eye development; regulation of epidermal growth factor receptor signaling pathway; positive regulation of epidermal growth factor-activated receptor activity; ommatidial rotation.	EGFR AGONISTS, Keren (Krn) encodes an ligand for the receptor encoded by Egfr that is processed by the products of S and rho.	3.72058	7.88837	7.32408	XP_002030921.1
DS10_00000750	FBgn0031344	CG7420	n/a	Molecular function is unknown. Biological process is unknown.	Regulator of chromosome condensation 1/beta-lactamase-inhibitor protein II	3.7205	3.72125	4.36359	XP_002077760.1
DS10_00010012	FBgn0003169	CG7904	put	Molecular function: activin-activated receptor activity; activin binding; transforming growth factor beta-activated receptor activity. Biological process: single-organism developmental process; biological regulation; system development; cellular process; open tracheal system development; embryonic development via the syncytial blastoderm; neuron differentiation; multicellular organismal developme…	Ser/Thr protein kinase, TGFB receptor, punt (put) encodes a transforming growth factor beta type II receptor that functions in both Dpp/BMP and Activin signaling.	3.72046	11.399	9.01021	AAL25438.1
DS10_00009196	FBgn0029155	CG5889	Men-b	Molecular function: malate dehydrogenase (oxaloacetate-decarboxylating) (NADP+) activity. Biological process: pyruvate metabolic process; malate metabolic process.	Malic enzyme b, MALATE DEHYDROGENASES	3.71776	128.225	44.9336	NP_001163749.1
DS10_00003151	FBgn0034083	CG8434	lbk	Molecular function is unknown. Biological process: chaeta morphogenesis; oogenesis.	lambik, Cysteine-rich flanking region, C-terminal	3.71377	3.55113	4.16414	XP_001975410.1
DS10_00001169	FBgn0000636	CG5803	Fas3	Molecular function is unknown. Biological process: olfactory learning; synaptic target recognition; axon guidance; learning or memory; imaginal disc-derived wing morphogenesis.	CD80-like, immunoglobulin C2-set, Fasciclin 3 (Fas3) encodes a cell adhesion molecule expressed by subsets of motoneurons and muscle cells in the embryonic/larval motor system.	3.71004	8.81735	7.80191	NP_001097174.1
DS10_00009195	FBgn0039491	CG6059	n/a	Molecular function is unknown. Biological process is unknown.	n/a	3.70473	4.53615	5.20638	XP_001981586.1
DS10_00006330	FBgn0283680	CG45017	IP3K2	Molecular function: calcium-dependent protein binding; calmodulin binding; inositol-1,4,5-trisphosphate 3-kinase activity. Biological process: inositol phosphate biosynthetic process.	Inositol 1,4,5-triphosphate kinase 2, Inositol polyphosphate kinase	3.70264	14.7714	10.3556	XP_002106846.1
DS10_00010828	FBgn0266719	CG34349	stac	Molecular function is unknown. Biological process is unknown.	staccato, Munc13 homology 1	3.701	2.77755	3.17761	NP_651329.4
DS10_00006880	FBgn0030245	CG1637	n/a	Molecular function: acid phosphatase activity. Biological process is unknown.	Metallo-dependent phosphatase-like	3.70045	117.594	42.408	XP_002100939.1
DS10_00007608	FBgn0040687	CG14645	n/a	Molecular function: chitin binding. Biological process: chitin metabolic process.	Chitin binding domain superfamily	3.6998	13906.8	2197.11	XP_002038280.1
DS10_00005961	FBgn0030004	CG10958	n/a	Molecular function is unknown. Biological process is unknown.	Dynein regulatory complex protein	3.69857	6.21248	6.41941	XP_002101187.1
DS10_00009308	FBgn0045443	CG31147	mthl11	Molecular function: G-protein coupled receptor activity. Biological process: G-protein coupled receptor signaling pathway; determination of adult lifespan; response to stress.	methuselah-like 11, GPCR, family 2-like	3.69623	2.35226	2.45467	XP_002103986.1
DS10_00008882	FBgn0041096	CG32096	rols	Molecular function: protein binding. Biological process: myoblast fusion; anterior Malpighian tubule development; border follicle cell migration.	rolling pebbles, P-loop containing nucleoside triphosphate hydrolase	3.68678	1.66204	0.896244	XP_002084590.1
DS10_00012844	FBgn0036770	CG5485	Prestin	Molecular function: formate transmembrane transporter activity; sulfate transmembrane transporter activity; oxalate transmembrane transporter activity; bicarbonate transmembrane transporter activity; inorganic anion exchanger activity. Biological process: sulfate transport; bicarbonate transport; oxalate transport; formate transport.	SLC26A/SulP transporter	3.6866	16.9313	11.3348	XP_002085337.1
DS10_00005822	FBgn0027535	CG15110	botv	Molecular function: acetylglucosaminyltransferase activity. Biological process: decapentaplegic signaling pathway; smoothened signaling pathway; glycosaminoglycan biosynthetic process; heparan sulfate proteoglycan biosynthetic process, polysaccharide chain biosynthetic process; Wnt receptor signaling pathway; heparan sulfate proteoglycan biosynthetic process.	brother of tout-velu, Nucleotide-diphospho-sugar transferases	3.67707	4.7797	5.47027	NP_523790.1
DS10_00005895	FBgn0003345	CG8544	sd	Molecular function: RNA polymerase II distal enhancer sequence-specific DNA binding; transcription factor binding; transcription regulatory region DNA binding; RNA polymerase II distal enhancer sequence-specific DNA binding transcription factor activity; protein domain specific binding. Biological process: wing disc development; somatic muscle development; positive regulation of transcription fro…	scalloped (sd) encodes a DNA binding protein of the TEAD class.	3.67458	2.52229	2.81565	ADR01753.1
DS10_00008349	FBgn0000635	CG3665	Fas2	Molecular function: protein binding. Biological process: biological regulation; single-organism developmental process; cellular component organization or biogenesis; synapse organization; system development; regulation of developmental process; regulation of anatomical structure size; neuron differentiation; post-embryonic organ morphogenesis; sensory organ development; learning or memory; open t…	Fasciclin 2, Immunoglobulin-like domain	3.67174	11.7723	9.22897	XP_002037039.1
DS10_00011372	FBgn0039299	CG11854	n/a	Molecular function is unknown. Biological process is unknown.	Haemolymph juvenile hormone binding	3.66686	22.0227	13.6951	XP_002043898.1
DS10_00000293	FBgn0041337	CG18559	Cyp309a2	Molecular function: electron carrier activity. Biological process: oxidation-reduction process.	Cytochrome P450 superfamily	3.66394	24.4601	14.8237	XP_002077895.1
DS10_00007422	FBgn0039886	CG2003	n/a	Molecular function: high affinity inorganic phosphate:sodium symporter activity. Biological process: transmembrane transport.	Major facilitator superfamily, SLC17 FAMILY OF ORGANIC ANION TRANSPORTERS	3.6517	8.01461	7.49555	XP_001981033.1
DS10_00004650	FBgn0040345	CG3708	n/a	Molecular function: histone binding. Biological process: nucleosome assembly.	NAP-like superfamily	3.65166	1.69769	1.02029	XP_001982445.1
DS10_00008823	FBgn0036831	CG6839	n/a	Molecular function: metal ion binding; hydrolase activity; nucleic acid binding. Biological process is unknown.	DNA/RNA non-specific endonuclease	3.65053	137.814	48.0164	XP_002042638.1
DS10_00003720	FBgn0035870	CG7189	Gr66a	Molecular function: taste receptor activity. Biological process: chemosensory behavior; response to caffeine; response to insecticide.	Gustatory receptor 66a	3.65024	64.0883	27.663	NP_523971.3
DS10_00008311	FBgn0037845	CG14694	n/a	Molecular function: reduced folate carrier activity. Biological process: transport.	MFS transporter superfamily	3.65017	21.7483	13.6161	XP_002097142.1
DS10_00012929	FBgn0036501	CG7272	n/a	Molecular function is unknown. Biological process is unknown.	SWEET sugar transporter	3.64823	119.744	43.4207	XP_002084958.1
DS10_00012752	FBgn0039673	CG7568	n/a	Molecular function is unknown. Biological process is unknown.	G-protein beta WD-40 repeat, WD40-repeat-containing domain	3.64621	2.70873	3.16303	XP_002098578.1
DS10_00007042	FBgn0261617	CG15319	nej	BlastP against D. melanogaster AA	nejire (nej) encodes the transcriptional co-activator CBP. It acetylates several nuclear proteins, including the histone encoded by His3 on K18, K27, and H4 on K8	3.64438	13.5296	10.019	XP_002041796.1
DS10_00007584	FBgn0037217	CG14636	n/a	Molecular function is unknown. Biological process: sensory perception of sound.	n/a	3.64156	3.25287	3.85485	XP_001978784.1
DS10_00002899	FBgn0033475	CG12129	n/a	Molecular function: RNA binding; catalytic activity. Biological process: regulation of transcription, DNA-dependent.	Activating signal cointegrator 1 complex subunit 1	3.63224	20.8836	13.2539	NP_610545.1
DS10_00006510	FBgn0000546	CG1765	EcR	Molecular function: ecdysteroid hormone receptor activity; protein binding; RNA polymerase II transcription coactivator binding; RNA polymerase II core promoter proximal region sequence-specific DNA binding transcription factor activity involved in positive regulation of transcription; transcription regulatory region sequence-specific DNA binding; protein heterodimerization activity; repressing t…	Ecdysone receptor (EcR) encodes a protein that interacts with the product of usp to form the nuclear ecdysone receptor heterodimer	3.62349	2.53249	2.91803	XP_002135948.1
DS10_00004827	FBgn0036999	CG5976	isoQC	Molecular function: glutaminyl-peptide cyclotransferase activity. Biological process: peptidyl-pyroglutamic acid biosynthetic process, using glutaminyl-peptide cyclotransferase.	iso Glutaminyl cyclase (isoQC) encodes a glutaminyl-peptide cyclotransferase involved in peptidyl-pyroglutamic acid biosynthesis.	3.6193	12.9189	9.82616	XP_002040679.1
DS10_00010639	FBgn0265351	CG9620	nac	Molecular function: GDP-fucose transmembrane transporter activity. Biological process: Golgi vesicle transport; N-glycan fucosylation; protein O-linked fucosylation; grooming behavior; GDP-fucose transport; GDP-fucose import into Golgi lumen.	neuronally altered carbohydrate, GDP-fucose transporter	3.61633	6.42798	6.69502	NP_649782.1
DS10_00001295	FBgn0043362	CG14001	bchs	Molecular function: metal ion binding. Biological process: chaeta development; regulation of protein ubiquitination; regulation of synapse organization; determination of adult lifespan; compound eye development; axonogenesis.	blue cheese (bchs) is a neuronally expressed gene that encodes a member of the BEACH (Beige and Chediak-Higashi)-domain superfamily,	3.61624	2.03442	1.85352	NP_608968.2
DS10_00006718	FBgn0263593	CG8709	Lpin	Molecular function: phosphatidate phosphatase activity; transcription coactivator activity. Biological process: response to starvation; negative regulation of BMP signaling pathway; triglyceride biosynthetic process; lipid homeostasis; imaginal disc-derived wing vein specification; regulation of cellular ketone metabolic process; regulation of fatty acid metabolic process.	Lipin (Lpin) encodes a protein that plays a central role in fat body function and energy metabolism.	3.60656	102.074	39.0824	XP_001970505.1
DS10_00010700	FBgn0038652	CG7720	n/a	Molecular function: sodium:iodide symporter activity. Biological process: transmembrane transport.	Sodium/glucose symporter superfamily	3.60307	16.8841	11.5705	XP_002102908.1
DS10_00004252	FBgn0037070	CG11309	n/a	Molecular function is unknown. Biological process is unknown.	Alpha/Beta hydrolase fold	3.59394	100.697	38.7287	NP_730617.1
DS10_00012587	FBgn0038033	CG10097	n/a	Molecular function: nucleotide binding; fatty-acyl-CoA reductase (alcohol-forming) activity. Biological process is unknown.	Fatty acyl-CoA reductase, NAD(P)-binding domain superfamily	3.58731	105.274	40.2971	XP_002031476.1
DS10_00002496	n/a	n/a	n/a	BlastP against D. melanogaster AA	n/a	3.58645	13.4124	10.0741	XP_002091279.1
DS10_00001194	FBgn0032694	CG15162	MESR3	Molecular function is unknown. Biological process: negative regulation of Ras protein signal transduction.	Misexpression suppressor of ras 3, NRF1/Ewg family	3.57673	8.73348	8.00842	XP_002038995.1
DS10_00005692	FBgn0033196	CG1358	n/a	Molecular function is unknown. Biological process: transmembrane transport.	Major facilitator superfamily	3.5684	26.031	15.8708	XP_002080458.1
DS10_00004213	FBgn0035715	CG10103	Ist1	Molecular function is unknown. Biological process is unknown.	Vacuolar protein sorting-associated protein Ist1	3.56742	55.1396	25.4088	NP_648058.1
DS10_00013370	FBgn0063368	CG40041	Gpb5	Molecular function: hormone activity; protein heterodimerization activity. Biological process is unknown.	Glycoprotein hormone beta 5, Cystine-knot cytokine, NEUROPEPTIDES	3.5656	2.62371	3.15263	NP_001104335.1
DS10_00012246	FBgn0003169	CG7904	put	Molecular function: activin-activated receptor activity; activin binding; transforming growth factor beta-activated receptor activity. Biological process: single-organism developmental process; biological regulation; system development; cellular process; open tracheal system development; embryonic development via the syncytial blastoderm; neuron differentiation; multicellular organismal developme…	punt (put) encodes a transforming growth factor beta type II receptor that functions in both Dpp/BMP and Activin signaling.	3.5648	21.5775	13.8559	XP_001979947.1
DS10_00006168	FBgn0085450	CG34421	Snoo	BlastP against D. melanogaster AA	Sno oncogene (Snoo) encodes a protein that belongs to the highly conserved Sno/Ski family of Smad binding proteins.	3.56178	2.76382	3.35371	XP_002036131.1
DS10_00003934	FBgn0052056	CG32056	scramb1	Molecular function: phospholipid scramblase activity. Biological process: synaptic transmission; neuron projection morphogenesis.	scramblase 1 (scramb1) encodes a protein that, together with the product of scramb2, has a modulatory function in the process of neurotransmission.	3.5582	22.1478	14.1729	NP_729600.1
DS10_00008707	FBgn0035589	CG4618	CHMP2B	Molecular function is unknown. Biological process: protein transport.	Charged multivesicular body protein 2b (CHMP2B) encodes an ESCRT-III component.	3.5523	41.9184	21.14	NP_647947.1
DS10_00000303	FBgn0000490	CG9885	dpp	Molecular function: heparin binding; protein heterodimerization activity; collagen binding; protein binding; protein homodimerization activity. Biological process: single-organism developmental process; biological regulation; post-embryonic organ morphogenesis; regulation of developmental process; dorsal/ventral axis specification; genital disc development; sensory organ development; localization…	decapentaplegic (dpp) encodes a ligand of the transforming growth factor-β signaling pathway that signals through Smad transcription factors.	3.54264	2.55807	3.09673	NP_477311.1
DS10_00011624	FBgn0038924	CG6028	n/a	Molecular function: catalytic activity. Biological process: metabolic process.	Fumarylacetoacetase-like, C-terminal	3.54231	334.64	90.5545	XP_002104362.1
DS10_00011733	FBgn0036336	CG11268	ste14	Molecular function: protein C-terminal S-isoprenylcysteine carboxyl O-methyltransferase activity. Biological process: C-terminal protein methylation.	isoprenylcysteine carboxylmethyltransferase	3.54002	14.7259	10.6762	XP_001972613.1
DS10_00007345	FBgn0259699	CG42353	n/a	Molecular function is unknown. Biological process is unknown.	n/a	3.53975	24.63	15.3356	XP_002100773.1
DS10_00010784	FBgn0025680	CG3772	cry	Molecular function: photoreceptor activity; flavin adenine dinucleotide binding; blue light photoreceptor activity; protein binding. Biological process: biological regulation; response to stimulus; response to light stimulus; response to abiotic stimulus; rhythmic process; detection of abiotic stimulus; system process; circadian rhythm; locomotory behavior; protein localization to nucleus; sensor…	cryptochrome, Cryptochrome/DNA photolyase, FAD-binding domain	3.53342	46.8017	23.1794	XP_002043337.1
DS10_00010672	FBgn0036942	CG7328	n/a	Molecular function: ketohexokinase activity. Biological process is unknown.	Carbohydrate/purine kinase, PfkB, conserved site	3.53026	4.64308	5.58714	XP_002085595.1
DS10_00013284	FBgn0005612	CG3090	Sox14	Molecular function: DNA binding, bending; sequence-specific DNA binding. Biological process: dendrite morphogenesis; metamorphosis; neuron remodeling; regulation of transcription from RNA polymerase II promoter.	Sox box protein 14 (Sox14) encodes a transcription factor involved in neurogenesis and metamorphosis.	3.52522	15.1001	10.9054	XP_001976516.1
DS10_00004865	FBgn0031118	CG1412	RhoGAP19D	Molecular function: Rho GTPase activator activity. Biological process: imaginal disc-derived leg morphogenesis.	Rho GTPase activating protein at 19D	3.5221	4.9581	5.80644	XP_002039554.1
DS10_00004670	FBgn0003068	CG2647	per	Molecular function: protein binding; transcription factor binding; protein heterodimerization activity. Biological process: biological regulation; rhythmic process; response to stimulus; multi-organism reproductive process; response to stress; mating; single-organism developmental process; multicellular organismal development; learning or memory; determination of adult lifespan; locomotory behavi…	period, PAS domain	3.51784	4.42691	5.42349	XP_002040540.1
DS10_00006601	FBgn0033813	CG12765	fsd	Molecular function: protein binding. Biological process: regulation of protein stability; anterior/posterior pattern specification.	fates-shifted (fsd) encodes an F-box protein with a role in the gradient formation of the product of bcd and fatemap specification through targeting bcd protein for ubiquitination and degradation.	3.51772	7.85231	7.59812	XP_002081314.1
DS10_00012700	FBgn0013995	CG5685	Calx	Molecular function: calcium ion binding; calcium:sodium antiporter activity. Biological process: phototransduction.	Na/Ca-exchange protein (Calx) encodes a Na-Ca exchanger involved in phototransduction and response to endoplasmic reticulum stress.	3.51515	6.69952	6.99992	NP_524423.2
DS10_00002897	FBgn0033212	CG1399	LRR	Molecular function: myosin I binding. Biological process: cilium assembly.	Leucine-rich repeat (LRR) encodes a protein that contributes to the response to insecticides.	3.51048	24.323	15.3345	NP_610316.3
DS10_00005922	FBgn0030697	CG8565	n/a	Molecular function: protein kinase activity; protein serine/threonine kinase activity. Biological process: protein phosphorylation.	Serine/threonine-protein kinase, active site	3.50267	17.4343	12.0493	XP_002100698.1
DS10_00007045	FBgn0030230	CG11556	Rph	Molecular function: protein transporter activity. Biological process: synaptic vesicle exocytosis; synaptic vesicle endocytosis.	Rabphilin, Zinc finger, RING/FYVE/PHD-type	3.49939	1.541	0.826378	XP_002101856.1
DS10_00006629	FBgn0013305	CG3798	Nmda1	Molecular function: N-methyl-D-aspartate selective glutamate receptor activity. Biological process is unknown.	N-methyl-D-aspartate receptor-associated protein, Bax inhibitor 1-related	3.49809	93.4504	37.4058	NP_725237.1
DS10_00002669	FBgn0010423	CG9073	TpnC47D	Molecular function: calcium ion binding. Biological process is unknown.	Troponin C at 47D, EF-Hand 1, calcium-binding site	3.49711	6.33308	6.79369	NP_476968.1
DS10_00006061	FBgn0040384	CG32795	n/a	Molecular function is unknown. Biological process is unknown.	Ion channel TACAN/TMEM120B	3.49693	156.878	54.872	XP_002100216.1
DS10_00006576	FBgn0000119	CG5912	arr	Molecular function: Wnt-activated receptor activity; Wnt-protein binding. Biological process: canonical Wnt receptor signaling pathway; nervous system development; regulation of compound eye pigmentation; Wnt receptor signaling pathway; protein targeting to lysosome; compound eye morphogenesis.	arrow (arr) encodes a type I trans-membrane protein and functions as an obligate co-receptor with the product of fz for the ligand encoded by wg in the canonical Wnt signaling pathway.	3.49385	4.02255	4.99015	XP_002033712.1
DS10_00005718	FBgn0034354	CG5224	GstE11	Molecular function: glutathione transferase activity. Biological process: glutathione metabolic process; neurogenesis.	Glutathione S transferase E11	3.49117	92.47	36.9773	NP_611339.1
DS10_00012956	FBgn0038830	CG17272	n/a	Molecular function: calcium ion binding. Biological process is unknown.	EF-hand domain	3.4908	12.7182	10.0231	NP_650917.1
DS10_00000083	FBgn0031283	CG15880	n/a	Molecular function is unknown. Biological process is unknown.	Frag1/DRAM/Sfk1	3.48416	3.71732	4.69857	XP_002087472.1
DS10_00010752	FBgn0038325	CG6194	Atg4b	Molecular function: cysteine-type endopeptidase activity. Biological process: autophagic cell death; salivary gland cell autophagic cell death.	Autophagy-related 4b (Atg4b) encodes a cysteine protease that cleaves the precursor product of Atg8a at the C-terminal region, thereby initiating autophagosome formation.	3.48128	8.10778	7.79701	XP_002097748.1
DS10_00002777	FBgn0033483	CG12919	egr	Molecular function: protein binding. Biological process: immune response; innate immune response; asymmetric protein localization involved in cell fate determination; melanization defense response; induction of apoptosis; negative regulation of neuromuscular synaptic transmission; neuron homeostasis; JNK cascade; defense response to Gram-negative bacterium; apical protein localization.	eiger (egr) encodes the TNF superfamily ligand that activates the intracellular JNK pathway through its receptor encoded by grnd or wgn.	3.48109	4.08896	5.09049	AAM51093.1
DS10_00008387	FBgn0030510	CG12177	n/a	Molecular function is unknown. Biological process is unknown.	Inosine/uridine-preferring nucleoside hydrolase domain	3.47344	18.8703	12.9365	XP_002100499.1
DS10_00010416	FBgn0085279	CG34250	n/a	Molecular function is unknown. Biological process is unknown.	n/a	3.47226	17.7816	12.2987	XP_001972936.1
DS10_00006359	FBgn0030796	CG4829	n/a	Molecular function: protein-glutamine gamma-glutamyltransferase activity. Biological process: neuron projection morphogenesis.	Gamma-glutamyltranspeptidase	3.46318	2.94388	3.69019	NP_001097005.1
DS10_00005221	FBgn0003159	CG2841	n/a	Molecular function is unknown. Biological process is unknown.	n/a	3.46306	33.5456	18.9084	XP_002100266.1
DS10_00000211	FBgn0045842	CG31732	yuri	Molecular function is unknown. Biological process: sperm individualization; microtubule basal body organization.	yuri gagarin (yuri) encodes a protein involved in gravitaxis, ciliary basal body organization and sperm individualization.	3.45881	6.22775	6.79396	NP_001162984.2
DS10_00001178	n/a	n/a	n/a	BlastP against D. melanogaster AA	n/a	3.45709	1.43378	0.627238
DS10_00006623	FBgn0023214	CG15085	edl	Molecular function: protein binding; RNA polymerase II transcription factor binding transcription factor activity involved in negative regulation of transcription. Biological process: photoreceptor cell development; regulation of Ras protein signal transduction; nuclear export; regulation of transcription, DNA-dependent; sensory organ development; embryonic pattern specification; regulation of ep…	ETS-domain lacking (edl) encodes a protein involved in Egfr signaling pathway regulation. It regulates the transcriptional repressor encoded by aop.	3.45315	2.59649	3.26912	XP_001974718.1
DS10_00000728	FBgn0031320	CG5126	n/a	Molecular function: transferase activity, transferring phosphorus-containing groups. Biological process is unknown.	ECDYSTEROID KINASE-LIKE	3.45223	65.1595	29.2913	NP_608584.1
DS10_00003785	FBgn0263930	CG4974	dally	Molecular function: protein binding. Biological process: single-organism developmental process; biological regulation; post-embryonic organ morphogenesis; sensory organ development; cellular component organization or biogenesis; regulation of developmental process; regulation of multicellular organismal process; system development; cell cycle; regulation of BMP signaling pathway; neuron different…	division abnormally delayed (dally) encodes a core protein of heparan sulfate proteoglycans of the glypican family.	3.44869	24.665	15.6845	XP_002093392.1
DS10_00006294	FBgn0030332	CG9360	n/a	Molecular function: oxidoreductase activity, acting on CH-OH group of donors. Biological process: metabolic process.	NAD(P)-binding domain superfamily	3.447	79.9873	33.7759	NP_572746.1
DS10_00009946	FBgn0004644	CG4637	hh	Molecular function: cell surface binding; protein binding. Biological process: single-organism developmental process; biological regulation; system development; localization; sensory organ development; cellular component movement; cellular component organization or biogenesis; embryonic pattern specification; open tracheal system development; regulation of nucleocytoplasmic transport.	hedgehog (hh) encodes the Hh signaling pathway ligand.	3.44495	2.96099	3.7414	XP_002098392.1
DS10_00009848	FBgn0265998	CG42320	Doa	BlastP against D. melanogaster AA	Darkener of apricot (Doa) encodes an essential Ser/Thr protein kinase with SR proteins (RNA maturation) and the product of eEF1γ (microtubule-based organelle transport) as substrates.	3.44366	2.0543	2.18359	XP_002098660.1
DS10_00007987	FBgn0030912	CG6023	n/a	Molecular function is unknown. Biological process is unknown.	n/a	3.44041	2.55148	3.23209	NP_996503.2
DS10_00006197	FBgn0030769	CG13012	n/a	Molecular function is unknown. Biological process is unknown.	n/a	3.43955	13.6448	10.4671	XP_001977471.1
DS10_00000050	FBgn0031258	CG4297	n/a	Molecular function is unknown. Biological process is unknown.	n/a	3.43928	2.09777	2.28888	NP_608527.2
DS10_00011986	FBgn0037942	CG14721	n/a	Molecular function: thiamine diphosphokinase activity. Biological process: thiamine metabolic process; thiamine diphosphate biosynthetic process.	Thiamin pyrophosphokinase	3.4353	1.87848	1.73666	NP_001262483.1
DS10_00004665	FBgn0040336	CG9904	Seipin	Molecular function is unknown. Biological process: response to starvation; regulation of triglyceride metabolic process; phosphatidic acid metabolic process; diacylglycerol metabolic process; regulation of lipid storage; regulation of lipid biosynthetic process.	Seipin (Seipin) encodes a transmembrane protein with roles in ER calcium homeostasis and lipid storage.	3.43466	37.5013	20.3457	XP_001982673.1
DS10_00001927	FBgn0287204	CG6488	Cog8	Molecular function is unknown. Biological process is unknown.	Component of oligomeric golgi complex 8	3.43319	4.31062	5.44577	XP_002079116.1
DS10_00000349	FBgn0027780	CG13401	Aasdh	Molecular function: catalytic activity. Biological process: fatty acid metabolic process.	Aminoadipate-semialdehyde dehydrogenase	3.43005	5.82136	6.51124	XP_001969203.1
DS10_00007578	FBgn0035499	CG14996	Chd64	Molecular function: protein binding; juvenile hormone response element binding. Biological process: juvenile hormone mediated signaling pathway.	Chd64 (Chd64) encodes a protein involved in the juvenile hormone mediated signaling pathway.	3.42873	362.72	99.662	NP_647860.1
DS10_00010038	FBgn0035499	CG14996	Chd64	Molecular function: protein binding; juvenile hormone response element binding. Biological process: juvenile hormone mediated signaling pathway.	Chd64 (Chd64) encodes a protein involved in the juvenile hormone mediated signaling pathway.	3.42873	362.72	99.662	NP_647860.1
DS10_00010231	FBgn0023095	CG11282	caps	Molecular function is unknown. Biological process: motor neuron axon guidance; axon guidance; homophilic cell adhesion; lateral inhibition; photoreceptor cell axon guidance; imaginal disc-derived wing morphogenesis; open tracheal system development; branch fusion, open tracheal system.	capricious (caps) encodes a transmembrane receptor with leucine-rich repeats that mediates cell interaction in a homophilic or heterophilic manner.	3.41993	19.8118	13.5721	NP_001036604.2
DS10_00005992	FBgn0052687	CG32687	n/a	Molecular function is unknown. Biological process is unknown.	Leucine-rich repeat	3.41896	270.168	80.328	XP_002101839.1
DS10_00003017	FBgn0035020	CG13585	n/a	Molecular function is unknown. Biological process is unknown.	Uncharacterised protein family, CD034/YQF4	3.41869	119.885	46.0495	NP_611928.1
DS10_00010278	FBgn0037609	CG9773	n/a	Molecular function is unknown. Biological process is unknown.	UNC-50	3.41623	4.52388	5.64346	XP_001954246.1
DS10_00002847	FBgn0053144	CG33144	n/a	Molecular function: zinc ion binding. Biological process is unknown.	E3 ubiquitin ligase RBR family	3.41566	9.86694	8.89089	XP_002090373.1
DS10_00012166	FBgn0015781	CG6009	P5cr	Molecular function: pyrroline-5-carboxylate reductase activity. Biological process: proline biosynthetic process.	Pyrroline 5-carboyxlate reductase	3.41297	63.0608	28.958	XP_002044715.1
DS10_00009923	FBgn0039528	CG5634	dsd	Molecular function is unknown. Biological process: synaptic target recognition.	distracted, Laminin EGF domain	3.40752	6.20187	6.85345	NP_651571.3
DS10_00010313	FBgn0000723	CG8874	FER	Molecular function: protein tyrosine kinase activity. Biological process: dorsal closure, elongation of leading edge cells; dorsal closure; actin filament bundle assembly; axon guidance; photoreceptor cell morphogenesis; dorsal closure, amnioserosa morphology change.	FER tyrosine kinase, Tyrosine-protein kinase, active site	3.405	1.97733	2.01497	XP_002031914.1
DS10_00006116	FBgn0285910	CG2934	VhaAC39-1	Molecular function: proton-transporting ATPase activity, rotational mechanism. Biological process: regulation of Notch signaling pathway; vacuolar acidification.	Vacuolar H[+] ATPase AC39 subunit 1 (VhaAC39-1) encodes a subunit of the Vacuolar H[+] ATPase required for acidification of intracellular vesicles and the lysosome.	3.39852	497.241	129.51	XP_001963746.1
DS10_00003700	FBgn0035848	CG7979	Uxs	Molecular function: dTDP-glucose 4,6-dehydratase activity. Biological process: cellular metabolic process.	UDP-xylose synthase, NAD(P)-binding domain	3.39666	15.2541	11.3521	XP_002029674.1
DS10_00002606	FBgn0033717	CG8839	n/a	Molecular function: fatty acid amide hydrolase activity. Biological process is unknown.	Amidase signature (AS) superfamily	3.39046	78.373	33.778	XP_002033528.1
DS10_00007247	FBgn0035769	CG8591	CTCF	Molecular function: sequence-specific DNA binding; chromatin insulator sequence binding. Biological process: maintenance of rDNA; segment specification; regulation of gene expression by genetic imprinting; negative regulation of transcription, DNA-dependent.	CTCF (CTCF) encodes a ubiquitous transcription factor that binds to insulators and domain boundaries.	3.38734	42.3647	22.3652	XP_002094032.1
DS10_00008473	FBgn0028717	CG17367	Lnk	Molecular function: signal transducer activity. Biological process: positive regulation of insulin receptor signaling pathway; positive regulation of insulin-like growth factor receptor signaling pathway; female mating behavior; regulation of growth.	Lnk (Lnk) encodes a member of the SH2B family of adaptor proteins.	3.38568	8.09342	7.96436	XP_002041310.1
DS10_00010930	FBgn0037092	CG7540	M6	Molecular function is unknown. Biological process: positive phototaxis; oogenesis; compound eye morphogenesis.	M6 (M6) encodes a four-transmembrane glycoprotein involved in eye morphogenesis and oogenesis.	3.37587	38.6821	20.9653	NP_649323.2
DS10_00002844	FBgn0033544	CG7220	n/a	Molecular function: ubiquitin-protein ligase activity. Biological process: proteolysis.	Ubiquitin-conjugating enzyme/RWD-like	3.37511	150.569	54.8286	NP_001097261.1
DS10_00001632	FBgn0263256	CG43394	n/a	Molecular function is unknown. Biological process is unknown.	n/a	3.37328	4.1114	5.29914	NP_001245938.1
DS10_00000586	FBgn0031476	CG8813	n/a	Molecular function is unknown. Biological process is unknown.	n/a	3.37236	1.26206	0.285083	NP_608727.1
DS10_00006709	FBgn0033259	CG11210	Tmem63	Molecular function is unknown. Biological process is unknown.	Transmembrane protein 63, 10TM putative phosphate transporter, cytosolic domain	3.36452	44.6205	23.4309	XP_001970516.1
DS10_00005862	FBgn0033340	CG13751	n/a	Molecular function is unknown. Biological process is unknown.	n/a	3.36289	14.5663	11.0776	XP_002032987.1
DS10_00005932	FBgn0030660	CG8097	n/a	Molecular function: ATP binding; arginine-tRNA ligase activity. Biological process: arginyl-tRNA aminoacylation.	Aminoacyl-tRNA synthetase, class Ia, anticodon-binding	3.36195	3.45637	4.54996	XP_001978070.1
DS10_00013340	FBgn0037518	CG2641	n/a	Molecular function is unknown. Biological process is unknown.	Arrestin, C-terminal, Immunoglobulin E-set	3.35489	2.94726	3.8624	ACJ13243.1
DS10_00012153	FBgn0036117	CG6321	n/a	Molecular function: catalytic activity; pyridoxal phosphate binding. Biological process: biosynthetic process.	Aminotransferase, class I/classII, Pyridoxal phosphate-dependent transferase domain 1	3.35399	39.165	21.1948	XP_001972328.1
DS10_00002989	FBgn0000326	CG9858	clt	Molecular function: carboxylesterase activity. Biological process: male mating behavior; imaginal disc-derived wing morphogenesis.	cricklet, Alpha/Beta hydrolase fold	3.35204	27.3767	17.213	XP_002091509.1
DS10_00010896	FBgn0051546	CG31546	n/a	Molecular function: oxidoreductase activity. Biological process: metabolic process.	STEROID DEHYDROGENASES, NAD(P)-binding domain superfamily	3.35162	1.79643	1.62456	XP_002098051.1
DS10_00013259	FBgn0260004	CG7000	Snmp1	Molecular function: scavenger receptor activity. Biological process: response to pheromone; cell surface receptor signaling pathway.	Sensory neuron membrane protein 1 (Snmp1) encodes a member of the CD36 family of lipoprotein receptors.	3.35146	1.75492	1.54382	XP_002096519.1
DS10_00010921	FBgn0028663	CG7625	VhaM9.7-b	Molecular function: hydrogen ion transmembrane transporter activity. Biological process: ATP hydrolysis coupled proton transport.	Vacuolar H+ ATPase M9.7 subunit b, ATPase, V0 complex, subunit e1/e2	3.34982	4563.27	1166.42	XP_001958019.1
DS10_00003854	FBgn0035996	CG3448	n/a	Molecular function: DNA binding. Biological process: double-strand break repair; DNA recombination.	DNA repair protein XRCC4	3.34689	2.33633	2.99208	XP_002029876.1
DS10_00007161	FBgn0028978	CG5408	trbl	Molecular function: protein serine/threonine kinase activity. Biological process: ventral furrow formation; negative regulation of mitosis; regulation of cell cycle.	tribbles (trbl) encodes the founding member of the Trib family of kinase-like proteins.	3.34608	30.451	18.3829	XP_002095464.1
DS10_00000082	FBgn0031282	CG3639	Pex12	Molecular function: protein C-terminus binding; zinc ion binding. Biological process: spermatid development; peroxisome organization; spermatocyte division.	Peroxin 12 (Pex12) encodes a peroxisome protein important for sperm development.	3.34005	1.97132	2.10401	XP_002041627.1
DS10_00005789	FBgn0034392	CG15094	MFS15	Molecular function: high affinity inorganic phosphate:sodium symporter activity. Biological process: sodium ion transport; phosphate ion transport.	Major Facilitator Superfamily Transporter 15	3.3386	43.8227	23.2808	NP_611375.2
DS10_00002673	FBgn0033609	CG13213	Fbl6	Molecular function: SAM domain binding. Biological process: regulation of protein stability; positive regulation of protein ubiquitination involved in ubiquitin-dependent protein catabolic process.	F-box and leucine-rich repeat protein 6	3.33651	16.0977	11.9199	XP_001976101.1
DS10_00010312	FBgn0037684	CG8129	Srr	Molecular function: L-threonine ammonia-lyase activity. Biological process: metabolic process.	Serine racemase, Pyridoxal-phosphate dependent enzyme	3.33629	9.75003	8.94685	XP_002031915.1
DS10_00003713	FBgn0027569	CG7207	cert	Molecular function: ceramide binding; ceramide transporter activity. Biological process: sphingolipid metabolic process; ceramide transport.	ceramide transfer protein (cert) encodes a protein involved in determination of lifespan	3.33095	66.957	30.7831	XP_001956242.1
DS10_00006449	FBgn0030403	CG1824 + CG1848	n/a + LIMK1	Molecular function: protein serine/threonine kinase activity. Biological process: synapse assembly; neuron projection morphogenesis; regulation of axonogenesis; compound eye development; establishment of planar polarity; imaginal disc morphogenesis; establishment of imaginal disc-derived wing hair orientation; protein phosphorylation; synaptic growth at neuromuscular junction.	ABC transporter type 1, transmembrane domain + LIM domain kinase 1	3.33033	7.23484	7.59548	XP_001978360.1
DS10_00006869	FBgn0030485	CG1998	n/a	Molecular function: C-4 methylsterol oxidase activity. Biological process: oxidation-reduction process; fatty acid biosynthetic process.	Fatty acid hydroxylase	3.32989	4.74377	5.92104	XP_002042938.1
DS10_00010613	n/a	n/a	n/a	BlastP against D. melanogaster AA	n/a	3.31921	3.80464	5.01578
DS10_00011488	FBgn0038524	CG7623	sll	Molecular function: 3'-phosphoadenosine 5'-phosphosulfate transmembrane transporter activity. Biological process: 3'-phosphoadenosine 5'-phosphosulfate transport; oocyte dorsal/ventral axis specification; heparan sulfate proteoglycan biosynthetic process.	slalom (sll) encodes the first transporter of 3'-phosphoadenosine 5'-phosphosulfate (PAPS), that transfers PAPS from cytosol into the lumen of Golgi.	3.31527	4.47497	5.75576	XP_002103046.1
DS10_00011541	FBgn0014018	CG11992	Rel	Molecular function: protein binding; sequence-specific DNA binding; sequence-specific DNA binding RNA polymerase II transcription factor activity; RNA polymerase II core promoter proximal region sequence-specific DNA binding transcription factor activity involved in positive regulation of transcription; DNA binding. Biological process: biological regulation; positive regulation of cellular biosyn…	Relish (Rel) encodes a transcription factor and the downstream component of the immune deficiency pathway,	3.31489	49.1747	25.0861	XP_002096897.1
DS10_00005120	FBgn0052813	CG32813	n/a	Molecular function is unknown. Biological process is unknown.	Myb/SANT-like DNA-binding domain	3.31093	9.47963	8.89578	XP_001982502.1
DS10_00000002	FBgn0026787	CG12178	Nhe1	Molecular function: sodium:hydrogen antiporter activity. Biological process: transmembrane transport; sodium ion transport; regulation of pH.	Na+/H+ hydrogen exchanger 1	3.30782	23.6219	15.8366	XP_002087373.1
DS10_00006062	FBgn0003996	CG2759	w	Molecular function: ATPase activity, coupled to transmembrane movement of substances. Biological process: cellular biogenic amine biosynthetic process; memory; compound eye pigmentation; cGMP transport; male courtship behavior; ommochrome biosynthetic process.	white (w) encodes a member of the ABCG2 class of transporters, transporting molecules such as cyclic GMP, biogenic amines and pigments including drosopterins and ommochromes.	3.30636	4.72753	5.9423	XP_002100215.1
DS10_00011156	FBgn0036568	CG5389	ATPsynβL	Molecular function: hydrogen-exporting ATPase activity, phosphorylative mechanism. Biological process: regulation of proton transport; determination of adult lifespan	ATP synthase, β subunit-like	3.30067	1.09806	0.034027	XP_002086515.1
DS10_00009161	FBgn0285963	CG46339	n/a	BlastP against D. melanogaster AA	Peptidase M1, alanine aminopeptidase/leukotriene A4 hydrolase	3.28773	4.80408	6.00176	NP_652744.2
DS10_00009019	FBgn0000455	CG5663	Dip-C	Molecular function: dipeptidyl-peptidase activity. Biological process: proteolysis.	Dipeptidase C, Aminopeptidase P, N-terminal	3.28641	137.569	52.1858	XP_001980413.1
DS10_00006170	FBgn0031970	CG7227	n/a	Molecular function: scavenger receptor activity. Biological process: defense response.	CD36 family	3.28512	29.4618	18.3188	NP_609169.1
DS10_00002645	FBgn0033579	CG13229	n/a	Molecular function: G-protein coupled receptor activity; neuropeptide receptor activity. Biological process: G-protein coupled receptor signaling pathway.	7TM GPCR, serpentine receptor class w (Srw)	3.28434	1.46463	0.902267	NP_610637.1
DS10_00009867	FBgn0027655	CG9995	htt	Molecular function is unknown. Biological process: establishment of mitotic spindle orientation; neuron projection morphogenesis.	huntingtin (htt) encodes a scaffold protein involved in mitotic spindle orientation, chromatin regulation and axonal transport.	3.2831	3.9364	5.23357	XP_002098683.1
DS10_00004845	FBgn0031142	CG10998	r-cup	Molecular function is unknown. Biological process: male meiosis.	ryder cup, Tetratricopeptide-like helical domain superfamily	3.28237	22.153	15.2352	XP_001978650.1
DS10_00005527	FBgn0034029	CG8190	eIF2Bγ	Molecular function: translation initiation factor activity. Biological process: cellular response to hypoxia.	eukaryotic translation initiation factor 2B subunit gamma	3.28176	120.143	48.01	AAL28411.2
DS10_00010820	FBgn0038877	CG3308	n/a	Molecular function: deoxyribonuclease activity. Biological process is unknown.	Metal-dependent hydrolase	3.27759	84.8584	36.8241	XP_002102604.1
DS10_00007409	FBgn0270927	CG2135	βGlu	Molecular function: beta-glucuronidase activity. Biological process: carbohydrate metabolic process.	β glucuronidase	3.27747	22.4708	15.3689	NP_651893.1
DS10_00004482	FBgn0035244	CG7955	ABCB7	Molecular function: ATPase activity, coupled to transmembrane movement of substances; transporter activity; heme transporter activity. Biological process: heme transport; iron-sulfur cluster assembly.	ATP binding cassette subfamily B member 7	3.27546	25.422	16.7391	XP_001971164.1
DS10_00002094	FBgn0050187	CG30187	n/a	BlastP against D. melanogaster AA	Serine proteases, trypsin domain	3.26865	1.19097	0.250247	NP_001246475.1
DS10_00011204	FBgn0038651	CG14299	Epg5	Molecular function is unknown. Biological process: lateral inhibition.	ectopic P-granules autophagy protein 5	3.26515	3.71654	5.02005	NP_650752.2
DS10_00000130	FBgn0021800	CG3920	Reph	Molecular function is unknown. Biological process: ephrin receptor signaling pathway; peripheral nervous system development.	Regulator of eph expression (Reph) encodes a putative nuclear protein involved in visual system development via the regulation of the product of Eph.	3.26303	3.32369	4.51998	NP_652052.1
DS10_00013247	FBgn0026179	CG32434	siz	Molecular function: cadherin binding. Biological process: myoblast fusion; central nervous system development; inter-male aggressive behavior; actin cytoskeleton organization; imaginal disc-derived wing morphogenesis.	schizo (siz) encodes an Arf1 guanine nucleotide exchange factor involved in commissural axon guidance and myoblast fusion.	3.26207	5.04251	6.22114	XP_001973574.1
DS10_00003645	FBgn0004380	CG10642	Klp64D	Molecular function: microtubule motor activity. Biological process: neuron projection morphogenesis; establishment or maintenance of microtubule cytoskeleton polarity; axon guidance; sensory perception of sound; anterograde axon cargo transport; sensory perception of smell; nonmotile primary cilium assembly.	Kinesin-like protein at 64D (Klp64D) encodes the kinesin-2α motor subunit of the heterotrimeric kinesin-2.	3.25975	3.03426	4.13093	XP_001971982.1
DS10_00000176	FBgn0028886	CG15279	n/a	Molecular function: cation:amino acid symporter activity; neurotransmitter:sodium symporter activity; neurotransmitter transporter activity. Biological process: neurotransmitter transport.	Sodium:neurotransmitter symporter	3.25727	11.9728	10.2039	NP_001014484.2
DS10_00010110	FBgn0038659	CG14296	EndoA	Molecular function: lysophosphatidic acid acyltransferase activity. Biological process: synaptic vesicle endocytosis; regulation of synapse structure and activity.	Endophilin A (EndoA) encodes an essential protein for synaptic vesicle endocytosis.	3.25425	4.42686	5.79925	AAL24818.1
DS10_00005729	FBgn0013983	CG5576	imd	Molecular function: death domain binding; protein binding. Biological process: immune response; response to bacterium; humoral immune response; positive regulation of innate immune response; nervous system development; positive regulation of antibacterial peptide biosynthetic process; antimicrobial humoral response; peptidoglycan recognition protein signaling pathway; antibacterial humoral respon…	immune deficiency (imd) encodes a canonic component of the immune deficiency pathway,	3.24896	22.2404	15.3808	XP_002082089.1
DS10_00001259	FBgn0000422	CG10697	Ddc	Molecular function: aromatic-L-amino-acid decarboxylase activity. Biological process: single-organism behavior; anatomical structure development; multicellular organismal process; organonitrogen compound metabolic process; memory; oxoacid metabolic process; single-organism developmental process; learning or memory; organic acid metabolic process; serotonin biosynthetic process from tryptophan; re…	Dopa decarboxylase, Aromatic-L-amino-acid decarboxylase	3.24619	22.1535	15.3396	XP_001974290.1
DS10_00005030	FBgn0029881	CG3973	pigs	Molecular function is unknown. Biological process: negative regulation of Notch signaling pathway; ovarian follicle cell stalk formation; ovarian follicle cell development.	pickled eggs, GAR domain superfamily, Negative Regulators of Notch Signaling Pathway	3.24604	11.6533	10.0823	XP_002099915.1
DS10_00000313	FBgn0032609	CG13280	n/a	Molecular function: nucleotide binding; oxidoreductase activity. Biological process is unknown.	NAD(P)-binding domain superfamily	3.24554	869.756	232.509	XP_002087665.1
DS10_00002582	FBgn0053964	CG33964	n/a	Molecular function is unknown. Biological process is unknown.	Methyltransferase domain	3.24476	158.043	59.0793	XP_011214290.1
DS10_00004696	FBgn0040349	CG3699	n/a	Molecular function: oxidoreductase activity, acting on CH-OH group of donors. Biological process: metabolic process.	NAD(P)-binding domain superfamily	3.24194	1908.89	547.677	XP_001982452.1
DS10_00005589	FBgn0033093	CG3270	n/a	Molecular function: oxidoreductase activity. Biological process: oxidation-reduction process.	FAD/NAD(P)-binding domain superfamily	3.24088	81.0514	35.8562	XP_001970741.1
DS10_00013336	FBgn0038020	CG10091	GstD9	Molecular function: glutathione transferase activity. Biological process: glutathione metabolic process.	Glutathione S transferase D9	3.23917	90.4186	39.3574	NP_650181.1
DS10_00008430	FBgn0260003	CG34157	Dys	Molecular function: WW domain binding. Biological process: neuromuscular synaptic transmission; regulation of neurotransmitter secretion; imaginal disc-derived wing vein morphogenesis; imaginal disc-derived wing vein specification; muscle organ development; regulation of short-term neuronal synaptic plasticity; muscle cell homeostasis; establishment of cell polarity.	Actinin-type actin-binding domain, conserved site	3.23175	3.51723	4.83494	XP_001979524.1
DS10_00009991	FBgn0038304	CG12241		Molecular function: GTPase activator activity. Biological process: regulation of Rab GTPase activity.	Rab-GTPase-TBC domain	3.21966	3.95132	5.37442	XP_002097787.1
DS10_00012216	FBgn0250785	CG9326	vari	Molecular function: guanylate kinase activity. Biological process: dorsal trunk growth, open tracheal system; regulation of tube size, open tracheal system; open tracheal system development; regulation of tube length, open tracheal system; septate junction assembly.	Guanylate kinase, conserved site	3.21467	3.12366	4.33806	XP_002012790.1
DS10_00012958	FBgn0038829	CG17271		Molecular function: calcium ion binding. Biological process is unknown.	EF-Hand 1, calcium-binding site	3.21389	37.4445	21.4424	XP_002072159.1
DS10_00002466	FBgn0033799	CG4604	GLaz	Molecular function is unknown. Biological process: determination of adult lifespan; cellular response to oxidative stress; cellular response to starvation.	Calycin	3.20954	2.15645	2.87016	AAL48460.2
DS10_00003630	FBgn0050428	CG30428		Molecular function is unknown. Biological process is unknown.	Myb/SANT-like DNA-binding domain	3.20639	11.5728	10.1607	XP_002092948.1
DS10_00012504	FBpp0075220	CG13067	Vm26Ab			3.2036	20.848	14.8911	AAS15672.1
DS10_00004225	FBgn0035724	CG10064			Cilia- and flagella-associated protein 52	3.19516	17.8078	13.2947	XP_002093973.1
DS10_00009921	FBgn0039528	CG5634	dsd	Molecular function is unknown. Biological process: synaptic target recognition.	CUB domain	3.19504	10.8541	9.85163	NP_651571.3
DS10_00010827	FBgn0266719	CG34349	stac		C2 domain	3.19373	2.11513	2.77021	NP_001262947.1
DS10_00013538	FBgn0015568	CG1031	alpha-Est1	Molecular function: carboxylesterase activity. Biological process is unknown.	Alpha/Beta hydrolase fold	3.19285	22.4976	15.7269	XP_001979204.1
DS10_00000708	FBgn0015905	CG4426	ast	Molecular function is unknown. Biological process: larval somatic muscle development; epidermal growth factor receptor signaling pathway; compound eye photoreceptor fate commitment; imaginal disc-derived wing vein morphogenesis; imaginal disc-derived wing morphogenesis; compound eye morphogenesis.	Asteroid	3.1919	8.74125	8.74206	XP_001968240.1
DS10_00011483	FBgn0038516	CG5840	P5cr-2	Molecular function: pyrroline-5-carboxylate reductase activity. Biological process: oxidation-reduction process; proline biosynthetic process.	6-phosphogluconate dehydrogenase-like, C-terminal domain superfamily	3.19	60.1806	29.7392	XP_001979754.1
DS10_00013463	FBgn0045759	CG18647	bin	Molecular function: sequence-specific DNA binding; RNA polymerase II distal enhancer sequence-specific DNA binding transcription factor activity; transcription regulatory region sequence-specific DNA binding. Biological process: mesodermal cell fate commitment; regulation of transcription from RNA polymerase II promoter; salivary gland morphogenesis.	Fork head domain	3.18346	1.04973	0.037824	XP_002083917.1
DS10_00011423	FBgn0037603	CG11753		Integral membrane protein SYS1		3.18144	8.87888	8.86664	NP_649809.1
DS10_00005060	FBgn0036203	CG6004	Muc68D	Molecular function: structural constituent of peritrophic membrane; extracellular matrix structural constituent. Biological process: chitin metabolic process.	Chitin binding domain	3.17494	41.6544	23.4432	XP_002135478.1
DS10_00010839	FBgn0039260	CG6369	Smg6	Molecular function: ribonuclease activity. Biological process: neuromuscular synaptic transmission; nuclear-transcribed mRNA catabolic process, nonsense-mediated decay; regulation of RNA stability; synapse organization.	DNA/RNA-binding domain, Est1-type	3.17192	2.52427	3.56384	XP_002099133.1
DS10_00002649	FBgn0003396	CG7734	shn	Molecular function: RNA polymerase II distal enhancer sequence-specific DNA binding transcription factor activity; RNA polymerase II activating transcription factor binding; RNA polymerase II transcription coactivator activity. Biological process: single-organism developmental process; biological regulation; post-embryonic organ morphogenesis; learning or memory; digestive tract development; syst…	Matrin/U1-C-like, C2H2-type zinc finger	3.17024	3.42973	4.84918	XP_002090331.1
DS10_00008028	FBgn0030941	CG6531	wgn	Molecular function: protein binding. Biological process: negative regulation of neuromuscular synaptic transmission; neuron homeostasis; cell surface receptor signaling pathway.	TNFR/NGFR cysteine-rich region	3.1693	4.82497	6.19628	NP_728186.1
DS10_00010459	FBgn0044826	CG14895	Pak3	Molecular function: receptor signaling protein serine/threonine kinase activity. Biological process: actin filament organization.	CRIB domain	3.16843	38.2571	22.1146	NP_650545.2
DS10_00010587	FBgn0266418	CG45058	wake	Molecular function is unknown. Biological process: signal transduction.	Ankyrin repeat	3.16659	1.51812	1.21318	XP_002098325.1
DS10_00012744	FBgn0038704	CG5316		Molecular function: damaged DNA binding. Biological process: single strand break repair.	Aprataxin, C2HE/C2H2/C2HC zinc finger	3.1623	2.45441	3.47547	XP_001979531.1
DS10_00013225	FBgn0036665	CG13024				3.16146	1.77442	1.88593	XP_002030826.1
DS10_00011295	FBgn0036504	CG7463	yellow-k		Major royal jelly protein/protein yellow	3.16004	1.48501	1.12941	NP_648772.1
DS10_00005960	FBgn0025800	CG2262	Smox	Molecular function: protein binding. Biological process: axon guidance; neuron development; regulation of mitotic cell cycle; mushroom body development; imaginal disc-derived wing morphogenesis.	Dwarfin	3.15213	14.3654	11.6205	NP_511079.1
DS10_00010993	FBgn0003093	CG1954	Pkc98E	Molecular function: protein kinase C activity; diacylglycerol binding. Biological process: neuron projection morphogenesis; Golgi organization; response to ethanol; negative regulation of cell proliferation; lipid particle organization.	AGC-kinase, C-terminal	3.14804	3.84812	5.36398	XP_002105290.1
DS10_00001824	FBgn0267828	CG46149	Fatp	Molecular function: long-chain fatty acid transporter activity. Biological process: triglyceride homeostasis.	AMP-binding, conserved site	3.14635	82.8474	37.5282	NP_001162940.2
DS10_00010053	FBgn0263110	CG43367		Molecular function: sphingomyelin phosphodiesterase activator activity. Biological process is unknown.	BEACH domain	3.14604	2.48048	3.5298	XP_002093660.1
DS10_00004802						3.14573	5.70589	6.91783	XP_001977740.1
DS10_00004499	FBgn0035227	CG12090	Iml1		Vacuolar membrane-associated protein Iml1	3.14429	5.47733	6.75987	XP_002093134.1
DS10_00001540	FBgn0031951	CG7138	r2d2	Molecular function: double-stranded RNA binding. Biological process: production of small RNA involved in gene silencing by RNA; siRNA loading onto RISC involved in RNA interference; heterochromatin organization involved in chromatin silencing; ovarian follicle cell stalk formation; production of siRNA involved in RNA interference; defense response to virus; regulation of production of small RNA i…	Double-stranded RNA-binding domain	3.14255	6.12637	7.23745	ABB77158.1
DS10_00000851	FBgn0051683	CG31683		Molecular function: O-acyltransferase activity. Biological process: lipid metabolic process.	Alpha/Beta hydrolase fold	3.14218	21.2553	15.313	XP_002090811.1
DS10_00003352	FBgn0016078	CG8804	wun	Molecular function: phosphatase activity. Biological process: germ cell migration; germ cell repulsion; open tracheal system development; septate junction assembly.		3.13863	49.4244	26.4237	XP_002089789.1
DS10_00011357						3.13506	2.2537	3.21745	XP_001979924.1
DS10_00002963	FBgn0015372	CG3870	RabX1	Molecular function: GTPase activity; GTP binding. Biological process: peripheral nervous system development.	P-loop containing nucleoside triphosphate hydrolase	3.13452	31.9807	19.895	XP_001976418.1
DS10_00011949	FBgn0015513	CG10379	mbc	Molecular function: protein binding; Rho guanyl-nucleotide exchange factor activity. Biological process: myoblast fusion; central nervous system development; dorsal closure; anterior Malpighian tubule development; border follicle cell migration; actin cytoskeleton organization; larval visceral muscle development; activation of Rac GTPase activity; cell competition in a multicellular organism; cyt…	C2 domain superfamily	3.13165	10.3095	9.66359	NP_477144.1
DS10_00012994	FBgn0038871	CG3337			Methyltransferase small domain	3.13163	1.97174	2.45971	XP_001979319.1
DS10_00012876	FBgn0037824	CG14684				3.12866	1.39913	0.921289	XP_001980658.1
DS10_00004907	FBgn0052695	CG32695				3.12777	28.513	18.817	XP_001966707.1
DS10_00011717	FBgn0039993	CG17691		Molecular function: 3-methyl-2-oxobutanoate dehydrogenase (2-methylpropanoyl-transferring) activity. Biological process: fatty-acyl-CoA biosynthetic process.	Thiamin diphosphate-binding fold	3.12563	4.6303	6.09982	XP_011213738.1
DS10_00005487	FBgn0261794	CG5594	kcc	Molecular function: potassium:chloride symporter activity. Biological process: response to mechanical stimulus; mechanosensory behavior.	Amino acid permease/ SLC12A domain	3.12542	45.6952	25.2196	XP_002092713.1
DS10_00007802	FBgn0052369	CG32369		Molecular function: ATP-dependent peptidase activity; zinc ion binding. Biological process: proteolysis.	Lon, substrate-binding domain	3.11749	2.15835	3.02394	XP_001971402.1
DS10_00000496	FBgn0027779	CG17332	VhaSFD	Molecular function: hydrogen-exporting ATPase activity, phosphorylative mechanism. Biological process: dsRNA transport; determination of adult lifespan.	Armadillo-like helical	3.11638	321.349	98.7961	XP_002079663.1
DS10_00010699	FBgn0038651	CG14299	Epg5	Molecular function is unknown. Biological process: lateral inhibition.	Ectopic P granules protein 5	3.11622	2.81648	4.05906	NP_650752.2
DS10_00000725	FBgn0051922	CG31922		Molecular function: zinc ion binding. Biological process: mRNA splicing, via spliceosome.	U1-C, C2H2-type zinc finger	3.1154	2.74703	3.9411	XP_002087516.1
DS10_00005791	FBgn0034394	CG15096		Molecular function: high affinity inorganic phosphate:sodium symporter activity. Biological process: transmembrane transport.	Major facilitator superfamily	3.11407	205.466	73.447	XP_002091859.1
DS10_00003853	FBgn0035995	CG3529		Molecular function is unknown. Biological process: intracellular protein transport.	ENTH/VHS	3.111	54.9743	28.4061	NP_648315.1
DS10_00004820	FBgn0031174	CG1486		Molecular function: pyridoxal phosphate binding; carboxy-lyase activity. Biological process: carboxylic acid metabolic process.	Pyridoxal phosphate-dependent decarboxylase	3.10834	20.8443	15.2646	XP_002101980.1
DS10_00009571	FBgn0038354	CG5404		Molecular function: high affinity sulfate transmembrane transporter activity. Biological process: sulfate transport.	SLC26A/SulP transporter	3.10654	1.36864	0.856824	XP_002097709.1
DS10_00008363	FBgn0031069	CG12703	Pmp70	Molecular function: ATPase activity, coupled to transmembrane movement of substances; transporter activity. Biological process: peroxisome organization.	AAA+ ATPase domain	3.10281	110.734	47.6604	XP_002100969.1
DS10_00008374	FBgn0031060	CG14231			ATPase, nucleotide binding domain	3.09831	2.47086	3.59698	XP_002100982.1
DS10_00001517	FBgn0260486	CG42533	Ziz	Molecular function: Rho guanyl-nucleotide exchange factor activity. Biological process: regulation of Rho protein signal transduction.	C2 domain superfamily	3.09409	2.2966	3.34804	NP_001260205.1
DS10_00002939	FBgn0262728	CG5472	Pal2	Molecular function: peptidylamidoglycolate lyase activity. Biological process: cellular metabolic process.	NHL repeat	3.0896	11.173	10.2475	XP_002082826.1
DS10_00005578	FBgn0033079	CG3174	Fmo-2	Molecular function: monooxygenase activity. Biological process: oxidation-reduction process.	FAD/NAD(P)-binding domain superfamily	3.08931	122.389	51.1489	XP_002080301.1
DS10_00002769	FBgn0263260	CG12918	sel	Molecular function is unknown. Biological process: polarity specification of dorsal/ventral axis; regulation of protein processing; maternal specification of dorsal/ventral axis, oocyte, germ-line encoded; regulation of protein secretion.	Domain of unknown function DUF3456	3.07983	102.003	44.9709	NP_610547.1
DS10_00009274	FBgn0286199	CG13611	shps		Amine oxidase	3.07487	2.21099	3.233	NP_651238.2
DS10_00000285	FBgn0031661	CG8890	Gmd	Molecular function: GDP-mannose 4,6-dehydratase activity. Biological process: GDP-L-fucose biosynthetic process; regulation of stem cell division; Notch signaling pathway.	GDP-mannose 4,6-dehydratase	3.07407	39.4434	23.1543	XP_001968744.1
DS10_00002177	FBgn0024234	CG5562	gbb	Molecular function: transforming growth factor beta receptor binding. Biological process: neuromuscular synaptic transmission; regulation of neurotransmitter secretion; positive regulation of muscle organ development; ovarian follicle cell development; positive regulation of synaptic growth at neuromuscular junction; imaginal disc-derived wing vein morphogenesis; imaginal disc-derived wing vein s…	Cystine-knot cytokine	3.07102	4.85611	6.39504	NP_477340.1
DS10_00002945	FBgn0034884	CG17662	Eglp3	Molecular function: water channel activity; channel activity. Biological process: transmembrane transport.	Aquaporin-like	3.06937	60.6228	30.9412	XP_001976438.1
DS10_00010258	FBgn0038974	CG5377		Molecular function: serine hydrolase activity. Biological process is unknown.	Alpha/Beta hydrolase fold	3.06141	29.2195	19.3226	XP_002098296.1
DS10_00002102	FBgn0034734	CG4554		Molecular function is unknown. Biological process: neurogenesis.	Armadillo-like helical	3.05956	7.75525	8.37933	XP_001974515.1
DS10_00012546	FBgn0038516	CG5840	P5cr-2	Molecular function: pyrroline-5-carboxylate reductase activity. Biological process: oxidation-reduction process; proline biosynthetic process.	6-phosphogluconate dehydrogenase-like, C-terminal domain superfamily	3.05604	86.1343	40.0006	XP_001979754.1
DS10_00003744	FBgn0035900	CG6694	ZC3H3	Molecular function: zinc ion binding; nucleic acid binding. Biological process: nuclear export; mRNA polyadenylation.	Zinc finger, CCCH-type	3.0541	3.86269	5.56964	XP_002093450.1
DS10_00002415	FBgn0033673	CG8298		Molecular function is unknown. Biological process: glycerol-3-phosphate metabolic process; carbohydrate metabolic process.	ATPase, nucleotide binding domain	3.05385	4.1501	5.84816	XP_002091145.1
DS10_00003401	FBgn0050010	CG30010		Molecular function is unknown. Biological process: wound healing.	Protein of unknown function DUF4505	3.05275	5.2279	6.75958	XP_002089854.1
DS10_00003195						3.05028	125.227	52.4166	XP_002092220.1
DS10_00011310	FBgn0053192	CG33192	MtnD	Molecular function: metal ion binding. Biological process: response to copper ion.	Metallothionein, family 5, Diptera	3.04906	3835.85	1161.55	XP_002013332.1
DS10_00003340	FBgn0033401	CG1968	Cog6	Molecular function is unknown. Biological process: intra-Golgi vesicle-mediated transport.	Conserved oligomeric Golgi complex subunit 6	3.04349	4.24078	5.9433	NP_724783.1
DS10_00008405	FBgn0261244	CG33174	inaE	Molecular function: lipoprotein lipase activity. Biological process: phototransduction.	Alpha/Beta hydrolase fold	3.03595	3.9238	5.64902	NP_001285230.1
DS10_00008197	FBgn0029820	CG16721			T-complex 11	3.03246	49.5826	27.263	XP_002101322.1
DS10_00007684	FBgn0263598	CG3762	Vha68-2	Molecular function: ATP binding; proton-transporting ATPase activity, rotational mechanism. Biological process: endosomal lumen acidification; imaginal disc growth.	ATPase, alpha/beta subunit, nucleotide-binding domain, active site	3.03205	543.036	161.672	XP_002042095.1
DS10_00012828	FBgn0011672	CG3671	Mvl	Molecular function: manganese ion transmembrane transporter activity; iron ion transmembrane transporter activity; copper ion transmembrane transporter activity; symporter activity. Biological process: iron assimilation; multicellular organismal iron ion homeostasis; copper ion transport; divalent metal ion transport; copper ion import; sensory perception of sweet taste; viral entry into host cel…	NRAMP family	3.02918	52.6378	28.3714	XP_002096501.1
DS10_00001188	FBgn0032689	CG10413		Molecular function: sodium:potassium:chloride symporter activity. Biological process: transmembrane transport.	Amino acid permease/ SLC12A domain	3.02589	25.7993	18.0684	NP_609887.1
DS10_00010579	FBgn0038088	CG10126		Molecular function: calcium ion binding. Biological process: neurogenesis.	EF-Hand 1, calcium-binding site	3.02272	2.34933	3.52265	XP_001954085.1
DS10_00002882	FBgn0033226	CG1882	puml	Molecular function: carboxylesterase activity. Biological process is unknown	Alpha/Beta hydrolase fold	3.01691	92.5672	42.5822	NP_610326.1
DS10_00002535	FBgn0010397	CG10119	LamC	Molecular function: structural molecule activity. Biological process: tendon development; muscle tissue morphogenesis; nuclear pore distribution; chromatin silencing; regulation of actin filament polymerization.	Intermediate filament, rod domain	3.01089	29.7971	19.7959	XP_002091326.1
DS10_00013446	FBgn0037714	CG9396		Molecular function: pyruvate transmembrane transporter activity. Biological process: mitochondrial pyruvate transport.	Mitochondrial pyruvate carrier	3.00901	34.0452	21.3178	XP_002096966.1
DS10_00002781	FBgn0001291	CG2275	Jra	Molecular function: protein binding; sequence-specific DNA binding RNA polymerase II transcription factor activity; protein heterodimerization activity. Biological process: negative regulation of antimicrobial humoral response; micropyle formation; positive regulation of transcription from RNA polymerase II promoter; JNK cascade; synaptic growth at neuromuscular junction; wound healing; imaginal …	Basic-leucine zipper domain	3.00618	43.9628	25.3958	NP_001260844.1
DS10_00005586	FBgn0259977	CG30445	Tdc1	Molecular function: tyrosine decarboxylase activity. Biological process: behavioral response to ethanol.	Aromatic-L-amino-acid decarboxylase	3.00511	1.38324	1.03027	XP_002089360.1
DS10_00010145	FBgn0038195	CG3061			Chaperone J-domain superfamily	3.00454	20.4119	15.551	XP_001955483.1
DS10_00003701	FBgn0035849	CG7404	ERR	Molecular function: ligand-activated sequence-specific DNA binding RNA polymerase II transcription factor activity. Biological process: carbohydrate metabolic process.	Nuclear hormone receptor	3.00392	24.9792	17.8227	XP_002094133.1
DS10_00000603	FBgn0028398	CG2859	Taf10	Molecular function: RNA polymerase II core promoter sequence-specific DNA binding transcription factor activity involved in preinitiation complex assembly. Biological process: transcription initiation from RNA polymerase II promoter.	Transcription initiation factor TFIID, 23-30kDa subunit	3.00285	2.17576	3.2694	XP_002087725.1
DS10_00011626	FBgn0038923	CG13410	mRpL35	Molecular function: structural constituent of ribosome. Biological process: translation.	Ribosomal protein L35	2.99803	4.34952	6.09138	NP_651001.2
DS10_00008863	FBgn0011723	CG7260	byn	Molecular function: sequence-specific DNA binding RNA polymerase II transcription factor activity; protein homodimerization activity. Biological process: hindgut morphogenesis; Malpighian tubule morphogenesis; positive regulation of transcription from RNA polymerase II promoter; midgut development.	p53-like transcription factor, DNA-binding	2.99709	1.25836	0.684129	NP_001261730.1
DS10_00002069						2.99702	1.27889	0.754098	AIJ28975.1
DS10_00002293	FBgn0034971	CG3209	Gpat4	Molecular function: 1-acylglycerol-3-phosphate O-acyltransferase activity. Biological process: metabolic process.	Phospholipid/glycerol acyltransferase	2.99331	124.846	53.1182	NP_726415.1
DS10_00005679	FBgn0033187	CG2144	PIG-G	Molecular function: catalytic activity. Biological process: metabolic process.	Alkaline-phosphatase-like, core domain superfamily	2.99024	5.37458	6.9401	XP_001970614.1
DS10_00004037	FBgn0013563	CG6760	Pex1	Molecular function: ATPase activity, coupled. Biological process: central nervous system development; glial cell development; peroxisome organization; spermatocyte division; peripheral nervous system development.	AAA+ ATPase domain	2.98748	7.40578	8.33283	XP_002084829.1
DS10_00012139	FBgn0039821	CG15556		Molecular function: G-protein coupled receptor activity. Biological process: G-protein coupled receptor signaling pathway.	GPCR, family 2, secretin-like	2.98481	2.34704	3.57559	NP_651845.2
DS10_00002830						2.98249	1.83903	2.34701	AAL25295.1
DS10_00006129	FBgn0052529	CG32529	Hers	Molecular function: transcription regulatory region sequence-specific DNA binding. Biological process: imaginal disc-derived wing morphogenesis; chromatin silencing; chromatin remodeling.	Bromo adjacent homology (BAH) domain	2.98068	1.37325	1.03167	XP_002039488.1
DS10_00007418	FBgn0039882	CG11576	Rift		Solute carrier family 52, riboflavin transporter	2.98061	22.2543	16.5798	NP_651901.3
DS10_00001043	FBgn0003557	CG4244	Su(dx)	Molecular function: Notch binding. Biological process: negative regulation of Notch signaling pathway; receptor internalization; imaginal disc-derived wing margin morphogenesis; imaginal disc-derived wing vein morphogenesis; Notch signaling pathway; lipid storage; imaginal disc-derived leg joint morphogenesis; regulation of protein localization.	C2 domain	2.98041	45.9433	26.3867	XP_002087608.1
DS10_00006446	FBgn0030407	CG2543	Fpgs	Molecular function: tetrahydrofolylpolyglutamate synthase activity. Biological process: tetrahydrofolylpolyglutamate biosynthetic process.	Folylpolyglutamate synthase, eukaryota	2.97813	2.79464	4.28897	XP_002100373.1
DS10_00009063	FBgn0037108	CG11306	Alg11	Molecular function: alpha-1,2-mannosyltransferase activity. Biological process: neurogenesis.	ALG11 mannosyltransferase	2.97625	21.3807	16.0855	XP_001973660.1
DS10_00000704	FBgn0031294	CG31795	IA-2	Molecular function: transmembrane receptor protein tyrosine phosphatase activity. Biological process: protein dephosphorylation.	Protein-tyrosine phosphatase, catalytic	2.97617	7.48565	8.41207	NP_722672.3
DS10_00005907	FBgn0030685	CG8948	Graf	Molecular function: Rho GTPase activator activity. Biological process: signal transduction.	AH/BAR domain superfamily	2.97553	20.1351	15.5734	NP_996441.2
DS10_00008917	FBgn0000568	CG8127	Eip75B	Molecular function: heme binding; DNA binding. Biological process: regulation of gene expression; response to ecdysone; molting cycle, chitin-based cuticle; antimicrobial humoral response; ecdysis, chitin-based cuticle; regulation of ecdysteroid metabolic process.	Nuclear hormone receptor	2.97331	2.01816	2.90577	XP_002044735.1
DS10_00004269	FBgn0053054	CG33054			Macro domain	2.9725	10.7858	10.323	XP_002085757.1
DS10_00011334	FBgn0028475	CG10221	Hrd3		Sel1-like repeat	2.96779	6.2023	7.59737	XP_001955397.1
DS10_00002712	FBgn0011674	CG11312	insc	Molecular function: cytoskeletal adaptor activity; protein binding. Biological process: localization; system development; macromolecule localization; biological regulation; single-organism developmental process; cell fate commitment; multicellular organismal development; protein localization; cellular component organization or biogenesis; neuroblast fate commitment.	Armadillo-like helical	2.96643	2.48721	3.83463	XP_002091632.1
DS10_00004567	FBgn0035168	CG13889	cep290	Molecular function is unknown. Biological process: olfactory behavior	Centrosomal protein of 290kDa	2.96075	2.44778	3.77467	XP_001971063.1
DS10_00009627	FBgn0024321	CG8524	NK7.1	Molecular function: sequence-specific DNA binding transcription factor activity. Biological process: regulation of transcription, DNA-dependent.	Homeobox, conserved site	2.95985	1.99022	2.85417	XP_002031208.1
DS10_00002486	FBgn0033900	CG8257	CysRS-m	Molecular function: cysteine-tRNA ligase activity. Biological process is unknown.	Aminoacyl-tRNA synthetase, class Ia, anticodon-binding	2.95725	4.84578	6.58722	XP_002033796.1
DS10_00006260	FBgn0030603	CG5541			Leucine-rich repeat domain superfamily	2.9548	62.2036	32.7429	XP_002100619.1
DS10_00012178	FBgn0029860	CG15891			UMA domain	2.9481	4.74917	6.47705	XP_002036795.1
DS10_00006602	FBgn0033812	CG4663	Pex13	Molecular function is unknown. Biological process: peroxisome organization; spermatocyte division.	Peroxin 13	2.9447	108.608	49.3871	XP_002090933.1
DS10_00005162	FBgn0026088	CG14818			Uncharacterised protein family UPF0184, eukaryota	2.93793	390.003	122.195	XP_002100344.1
DS10_00008780	FBgn0052856	CG32856			snRNA-activating protein complex subunit 5	2.93737	2.38327	3.69266	XP_001980127.1
DS10_00008511	FBgn0039719	CG15515		Molecular function: structural constituent of cuticle. Biological process is unknown.	Insect cuticle protein	2.93485	4.59862	6.42936	XP_002020458.1
DS10_00003471	FBgn0266346	CG17922	CngB	Molecular function: intracellular cyclic nucleotide activated cation channel activity. Biological process: transmembrane transport; ion transport.	Cyclic nucleotide-binding, conserved site	2.93403	1.48136	1.47546	XP_002082532.1
DS10_00012541	FBgn0044871	CG7700	Gos28	Molecular function: SNAP receptor activity. Biological process: ER to Golgi vesicle-mediated transport; intra-Golgi vesicle-mediated transport; vesicle-mediated transport.	Golgi SNAP receptor complex, subunit 1	2.93163	5.60685	7.24477	NP_650739.2
DS10_00005916	FBgn0030675	CG8191				2.931	2.54524	3.96066	XP_002100705.1
DS10_00004896	FBgn0052694	CG32694				2.92832	1.97105	2.86308	NP_727380.1
DS10_00011331	FBgn0039118	CG10208			Domain of unknown function DUF1989	2.92748	16.6089	13.7316	XP_001955389.1
DS10_00006556	FBgn0027581	CG6191		Molecular function: cyclin-dependent protein kinase regulator activity. Biological process: phagocytosis, engulfment.	CDK5 and ABL1 enzyme substrate 1/2	2.92537	48.4083	27.5948	NP_001260958.1
DS10_00002635	FBgn0033749	CG8819	achi	Molecular function: RNA polymerase II core promoter proximal region sequence-specific DNA binding transcription factor activity involved in positive regulation of transcription. Biological process: positive regulation of transcription, DNA-dependent; spermatogenesis.	Homeobox domain	2.92369	2.80397	4.38002	XP_002091038.1
DS10_00007549	FBgn0035476	CG12766		Molecular function: alditol:NADP+ 1-oxidoreductase activity. Biological process: oxidation-reduction process.	Aldo/keto reductase	2.92281	176.402	69.759	XP_001971803.1
DS10_00006211	FBgn0027287	CG33206	Gmap	Molecular function is unknown. Biological process: protein targeting to Golgi.	GRIP domain	2.92209	21.0078	16.1323	XP_001978079.1
DS10_00002892	FBgn0042135	CG18812	Gdap2		CRAL-TRIO lipid binding domain	2.92201	51.2616	28.6228	XP_001970580.1
DS10_00003637	FBgn0035588	CG10672		Molecular function: oxidoreductase activity, acting on CH-OH group of donors. Biological process: metabolic process.	NAD(P)-binding domain superfamily	2.91623	31.7973	20.9954	NP_647946.1
DS10_00000046	FBgn0004583	CG4114	ex	Molecular function: protein binding. Biological process: biological regulation; sensory organ development; regulation of multicellular organismal process; regulation of developmental process; single-organism developmental process; negative regulation of organ growth; regulation of growth; regulation of signal transduction; endocytic recycling; cellular process.	Band 4.1 domain	2.91499	2.77944	4.36186	XP_002087430.1
DS10_00008519	FBgn0039727	CG15523	Vps13B		Vacuolar protein sorting-associated protein 13	2.91441	1.67657	2.06524	NP_651753.2
DS10_00010619	FBgn0263289	CG43398	scrib	Molecular function: protein binding. Biological process: single-organism developmental process; biological regulation; cellular component organization or biogenesis; sensory organ development; post-embryonic organ morphogenesis; establishment of planar polarity; cell proliferation; instar larval development; cell junction organization; localization; stem cell differentiation; cell cycle; establis…	Leucine-rich repeat	2.91271	10.1674	10.1656	XP_002098907.1
DS10_00000715	FBgn0031306	CG4577				2.91084	6.02412	7.58225	XP_001968249.1
DS10_00002636	FBgn0033750	CG13151		Molecular function: DNA binding. Biological process is unknown.	PiggyBac transposable element-derived protein	2.90894	2.00175	2.98281	XP_001975896.1
DS10_00010885	FBgn0283535	CG1088	Vha26	Molecular function: proton-transporting ATPase activity, rotational mechanism. Biological process: proton transport.	V-type ATPase subunit E	2.90854	1162.2	347.213	XP_002098037.1
DS10_00007707	FBgn0032477	CG5287	Alg7	Molecular function: UDP-N-acetylglucosamine-dolichyl-phosphate N-acetylglucosaminephosphotransferase activity. Biological process is unknown.	Glycosyl transferase, family 4	2.9082	19.1481	15.2907	NP_609608.1
DS10_00001028	FBgn0032793	CG10189		Molecular function: tRNA binding. Biological process: tRNA thio-modification; tRNA wobble uridine modification	Cytoplasmic tRNA 2-thiolation protein 2	2.90663	2.05729	3.13999	XP_001974247.1
DS10_00007828	FBgn0261547	CG42665	Exn	Molecular function: Rho guanyl-nucleotide exchange factor activity; phospholipid binding. Biological process: regulation of neurotransmitter secretion; melanotic encapsulation of foreign target; imaginal disc-derived leg morphogenesis.	Dbl homology (DH) domain	2.89801	23.6073	17.6188	XP_002085219.1
DS10_00002382	FBgn0027596	CG10249	Kank	Molecular function is unknown. Biological process: neuron projection morphogenesis.	Ankyrin repeat	2.89553	1.50379	1.61881	NP_001097318.1
DS10_00012022	FBgn0039131	CG12268		Molecular function: nucleotide binding; fatty-acyl-CoA reductase (alcohol-forming) activity. Biological process is unknown.	Fatty acyl-CoA reductase	2.89238	2.04319	3.12228	XP_002099320.1
DS10_00004185						2.89139	12.5278	11.5401	NP_001261473.1
DS10_00010328	FBgn0040271	CG6725	Sulf1	Molecular function: N-acetylglucosamine-6-sulfatase activity; alkyl sulfatase activity. Biological process: regulation of Wnt receptor signaling pathway; negative regulation of epidermal growth factor receptor signaling pathway; pattern specification process; positive regulation of smoothened signaling pathway; negative regulation of smoothened signaling pathway; regulation of transforming growth…	Alkaline-phosphatase-like, core domain superfamily	2.89102	8.36164	9.18099	XP_002103204.1
DS10_00004281	FBgn0026179	CG32434	siz	Molecular function: cadherin binding. Biological process: myoblast fusion; central nervous system development; inter-male aggressive behavior; actin cytoskeleton organization; imaginal disc-derived wing morphogenesis.	IQ motif, EF-hand binding site	2.88929	6.17436	7.68356	XP_002095378.1
DS10_00003072	FBgn0029006	CG4943	Smurf	Molecular function: protein binding. Biological process: decapentaplegic signaling pathway; transforming growth factor beta receptor signaling pathway; negative regulation of BMP signaling pathway; embryonic hindgut morphogenesis; embryonic development via the syncytial blastoderm; negative regulation of gene expression; germarium-derived egg chamber formation; protein ubiquitination involved in …	C2 domain	2.88491	6.94023	8.25532	NP_611238.2
DS10_00012335	FBgn0036806	CG4120	Cyp12c1	Molecular function: electron carrier activity. Biological process: oxidation-reduction process.	Cytochrome P450	2.88212	17.6162	14.4671	XP_002085396.1
DS10_00005780	FBgn0034381	CG15088	List	Molecular function: neurotransmitter transporter activity; potassium:amino acid symporter activity. Biological process: response to lithium ion.	Sodium:neurotransmitter symporter	2.88172	2.4046	3.83876	NP_611364.2
DS10_00001710	FBgn0028539	CG31731	Eato	Molecular function: ATPase activity, coupled to transmembrane movement of substances; transporter activity. Biological process is unknown.	AAA+ ATPase domain	2.8817	20.768	16.1994	XP_002088635.1
DS10_00008083	FBgn0037445	CG9727		Molecular function: DNA binding. Biological process: regulation of transcription, DNA-dependent.	DNA-binding RFX-type winged-helix domain	2.87807	4.41702	6.38989	NP_001262317.1
DS10_00007925	FBgn0027532	CG7139			Domain of unknown function DUF1771	2.87372	16.107	13.6851	XP_002086229.1
DS10_00009066	FBgn0037110	CG14577	ORMDL		ORM1-like protein 3	2.8726	52.761	29.8592	XP_002040844.1
DS10_00008918	FBgn0000568	CG8127	Eip75B	Molecular function: heme binding; DNA binding. Biological process: regulation of gene expression; response to ecdysone; molting cycle, chitin-based cuticle; antimicrobial humoral response; ecdysis, chitin-based cuticle; regulation of ecdysteroid metabolic process.	Nuclear hormone receptor	2.87184	2.10301	3.30177	XP_002094942.1
DS10_00002900	FBgn0033474	CG1407		Molecular function: protein-cysteine S-palmitoleyltransferase activity. Biological process: protein palmitoylation.	Palmitoyltransferase, DHHC domain	2.8635	11.1016	10.8208	XP_002089881.1
DS10_00006147						2.86262	1.13297	0.553167	XP_002019194.1
DS10_00012082	FBgn0038704	CG5316		Molecular function: damaged DNA binding. Biological process: single strand break repair.	Aprataxin, C2HE/C2H2/C2HC zinc finger	2.86127	6.25739	7.82651	XP_001979531.1
DS10_00009443	FBgn0000278	CG1878	CecB	Molecular function is unknown. Biological process: defense response to Gram-negative bacterium; autophagic cell death; humoral immune response; defense response to Gram-positive bacterium; salivary gland cell autophagic cell death; antibacterial humoral response.	Cecropin	2.86056	1.36056	1.16974	XP_001999093.1
DS10_00010929	FBgn0037092	CG7540	M6	Molecular function is unknown. Biological process: positive phototaxis; oogenesis; compound eye morphogenesis.	Myelin proteolipid protein PLP	2.85917	22.9149	17.4575	XP_005180759.1
DS10_00011656	FBgn0028487	CG9611	f-cup	Molecular function is unknown. Biological process: Ras protein signal transduction.	Leucine-rich repeat	2.8567	3.51076	5.49859	XP_001980235.1
DS10_00011392	FBgn0038173	CG9345	Adgf-C	Molecular function: growth factor activity. Biological process: purine ribonucleoside monophosphate biosynthetic process.	Adenosine/AMP deaminase domain	2.85254	1.12749	0.547	XP_002097565.1
DS10_00007257						2.8463	34.7354	22.7074	NP_648121.1
DS10_00008690	FBgn0261797	CG7507	Dhc64C	Molecular function: microtubule motor activity; ATPase activity, coupled. Biological process: localization; single-organism developmental process; cellular component organization or biogenesis; biological regulation; cell cycle; cellular localization; cellular component movement; cell cycle process; multicellular organism reproduction; regulation of cellular component organization; microtubule-ba…	AAA+ ATPase domain	2.84587	8.89717	9.58626	NP_001261432.1
DS10_00011312	FBgn0067783	CG4241	DPCoAC	Molecular function: transmembrane transporter activity. Biological process: transmembrane transport.	Graves disease carrier protein	2.84313	23.8905	18.1534	XP_001979424.1
DS10_00003782	FBgn0052024	CG32024		Molecular function: chitin binding. Biological process: chitin metabolic process.	Chitin binding domain	2.8422	5.01809	6.93612	XP_001971597.1
DS10_00009234	FBgn0037327	CG2087	PEK	Molecular function: elongation factor-2 kinase activity. Biological process: regulation of G2/M transition of mitotic cell cycle.	Protein kinase, ATP binding site	2.83902	8.77089	9.52189	XP_002102216.1
DS10_00006340	FBgn0004456	CG1771	mew	Molecular function: cell adhesion molecule binding; receptor activity. Biological process: salivary gland boundary specification; axon guidance; axonal defasciculation; cell adhesion; imaginal disc-derived wing morphogenesis; maintenance of epithelial integrity, open tracheal system; sensory perception of smell; muscle attachment; salivary gland morphogenesis.	FG-GAP repeat	2.83891	5.0996	7.04258	NP_001285196.1
DS10_00003316	FBgn0033382	CG8058	Hydr1	Molecular function: lipase activity. Biological process: lipid metabolic process.	AB hydrolase 4, conserved site	2.83249	49.7651	28.8184	XP_002089749.1
DS10_00003057	FBgn0035065	CG3589		Molecular function: catalytic activity. Biological process is unknown.	Peptidase S1, PA clan	2.82953	11.2055	10.9724	XP_002092893.1
DS10_00000815	FBgn0011202	CG1768	dia	Molecular function: protein binding. Biological process: cell cycle; cellular component organization or biogenesis; single-organism developmental process; biological regulation; localization; cell cycle process; system development; multicellular organism reproduction; actin filament-based process; multicellular organismal development.	Armadillo-like helical	2.82872	16.9489	14.3673	NP_001246113.1
DS10_00006673	FBgn0011592	CG8581	fra	Molecular function: netrin receptor activity. Biological process: motor neuron axon guidance; salivary gland boundary specification; axon guidance; glial cell migration; dendrite morphogenesis; axon midline choice point recognition; dendrite guidance.	Fibronectin type III	2.82437	6.446	8.06364	NP_001286353.1
DS10_00009401						2.82371	1685.99	525.813	XP_002104055.1
DS10_00001427	FBgn0021944	CG3433	Coprox	Molecular function: coproporphyrinogen oxidase activity. Biological process: heme biosynthetic process.	Coproporphyrinogen III oxidase, aerobic	2.82257	81.3276	41.0582	XP_001970103.1
DS10_00006178	FBgn0054015	CG34015		Molecular function: catalytic activity. Biological process is unknown.	HIT-like domain	2.81916	65.9601	35.6407	XP_002100815.1
DS10_00009022			lig3	Molecular function: DNA ligase (ATP) activity. Biological process: DNA ligation involved in DNA repair; DNA recombination		2.81862	4.57254	6.62641	XP_001980417.1
DS10_00007130	FBgn0039890	CG2316	ABCD	Molecular function: ATPase activity, coupled to transmembrane movement of substances; transporter activity. Biological process: transmembrane transport.	AAA+ ATPase domain	2.81832	120.243	54.5164	NP_651906.1
DS10_00006683	FBgn0033240	CG2906			Methyltransferase domain	2.81661	2.52003	4.14657	XP_002080519.1
DS10_00003031	FBgn0035033	CG3548			Myb/SANT-like DNA-binding domain	2.81538	4.09684	6.16575	XP_001976636.1
DS10_00002336	FBgn0034500	CG11200		Molecular function: carbonyl reductase (NADPH) activity. Biological process: metabolic process.	NAD(P)-binding domain superfamily	2.81525	17.1779	14.5743	XP_002082315.1
DS10_00001452	FBgn0031860	CG11236		Molecular function: D-aspartate oxidase activity. Biological process: oxidation-reduction process.	D-amino-acid oxidase	2.81416	68.5131	36.6471	NP_609075.1
DS10_00000637	FBgn0031652	CG8873	jet	Molecular function is unknown. Biological process: circadian behavior; locomotor rhythm; entrainment of circadian clock by photoperiod.	Leucine-rich repeat, cysteine-containing subtype	2.81028	2.92401	4.75385	XP_002015019.1
DS10_00012384	FBgn0036623	CG4729		Molecular function: 1-acylglycerol-3-phosphate O-acyltransferase activity. Biological process: metabolic process.	Acyltransferase, C-terminal domain	2.81014	89.1995	43.9886	XP_002085135.1
DS10_00011161	FBgn0036210	CG14130			Alpha-ketoglutarate-dependent dioxygenase alkB homologue 7	2.80783	5.05236	7.05242	XP_002084550.1
DS10_00010813	FBgn0038871	CG3337			Methyltransferase small domain	2.80317	1.54546	1.88571	XP_001979319.1
DS10_00008591						2.80186	1.45428	1.6066	XP_008179419.1
DS10_00008592						2.80186	1.45428	1.6066	XP_008179419.1
DS10_00010510	FBgn0264490	CG18389	Eip93F	Molecular function: DNA binding; sequence-specific DNA binding transcription factor activity. Biological process: activation of cysteine-type endopeptidase activity involved in apoptotic process; hormone-mediated apoptotic signaling pathway; positive regulation of transcription from RNA polymerase II promoter; cellular response to hypoxia; cellular response to ecdysone; autophagic cell death; aut…	DNA binding HTH domain, Psq-type	2.79164	1.46068	1.64007	NP_652002.2
DS10_00011298	FBgn0000565	CG7266	Eip71CD	Molecular function: peptide-methionine (S)-S-oxide reductase activity. Biological process: neuron projection morphogenesis; determination of adult lifespan; response to oxidative stress; cellular response to oxidative stress; autophagic cell death; salivary gland cell autophagic cell death.		2.78993	103.6	49.6203	NP_996093.2
DS10_00006248	FBgn0030615	CG9081	Cyp4s3	Molecular function: electron carrier activity. Biological process: oxidation-reduction process.	Cytochrome P450	2.78249	3.58126	5.72319	NP_573003.2
DS10_00011224	FBgn0039759	CG9733		Molecular function: serine-type endopeptidase activity. Biological process: proteolysis; defense response.	Peptidase S1, PA clan	2.78248	1.7138	2.42632	XP_002139036.1
DS10_00007456	FBgn0040071	CG6889	tara	Molecular function is unknown. Biological process: lateral inhibition; wing disc dorsal/ventral pattern formation; chromatin-mediated maintenance of transcription.	SERTA domain	2.78048	1.56307	1.97235	XP_002041247.1
DS10_00005140	FBgn0023530	CG3740			Protein C19orf12 homologue	2.77978	31.0325	21.5505	XP_001982532.1
DS10_00006400	FBgn0032706	CG10369	Irk3	Molecular function: inward rectifier potassium channel activity. Biological process: wing disc development.	Immunoglobulin E-set	2.77921	1.34823	1.27208	XP_002079825.1
DS10_00010097	FBgn0260388	CG42514		Molecular function: adenylate cyclase activity. Biological process: transmembrane transport.	Major facilitator superfamily	2.77745	11.8763	11.5829	ACU33950.1
DS10_00002409	FBgn0262820	CG43191				2.7771	1.28415	1.08197	NP_001246272.1
DS10_00012193	FBgn0036813	CG6877	Atg3	Molecular function is unknown. Biological process: autophagy.	Autophagy-related protein 3	2.77575	47.3115	28.5121	XP_002094869.1
DS10_00010276	FBgn0086679	CG9770	p	Molecular function is unknown. Biological process: compound eye pigmentation; eye pigment biosynthetic process; protein targeting to lysosome; negative regulation of gene silencing by RNA; ommochrome biosynthetic process.	Hermansky-Pudlak syndrome 5 protein	2.77165	8.10533	9.24963	XP_002096831.1
DS10_00010294	FBgn0260935	CG9746	Vps15	Molecular function: protein serine/threonine kinase activity. Biological process: cellular response to amino acid starvation; positive regulation of antibacterial peptide biosynthetic process; macroautophagy; regulation of antimicrobial peptide production.	Armadillo-like helical	2.77008	3.65555	5.81441	XP_002104160.1
DS10_00003566	FBgn0045442	CG32853	mthl12	Molecular function: G-protein coupled receptor activity. Biological process: G-protein coupled receptor signaling pathway; determination of adult lifespan; response to stress.	GCR1-cAMP receptor	2.76961	1.29714	1.1294	XP_002081903.1
DS10_00007192	FBgn0036913	CG8334	Usp32	Molecular function: ubiquitin-specific protease activity. Biological process: ubiquitin-dependent protein catabolic process	DUSP-like superfamily	2.76925	6.12578	7.91812	XP_002095552.1
DS10_00005947	FBgn0261873	CG32717	sdt	Molecular function: protein binding. Biological process: chitin-based cuticle development; lateral inhibition; zonula adherens assembly; establishment or maintenance of polarity of embryonic epithelium; establishment or maintenance of epithelial cell apical/basal polarity.	Guanylate kinase, conserved site	2.76459	5.18345	7.25416	NP_996375.1
DS10_00005190	FBgn0025627	CG4194				2.76252	0.949286	0.24523	XP_002100318.1
DS10_00001206	FBgn0032706	CG10369	Irk3	Molecular function: inward rectifier potassium channel activity. Biological process: wing disc development.	Immunoglobulin E-set	2.76248	3.33155	5.43588	XP_002020740.1
DS10_00008478	FBgn0027583	CG7601		Molecular function: oxidoreductase activity. Biological process: metabolic process.	NAD(P)-binding domain superfamily	2.75768	30.2687	21.4345	XP_002105382.1
DS10_00008218	FBgn0030761	CG9784		Molecular function: inositol trisphosphate phosphatase activity. Biological process: dephosphorylation.	Endonuclease/exonuclease/phosphatase	2.75474	28.1117	20.6064	NP_573135.1
DS10_00004866	FBgn0031117	GstT3	GstT3	Molecular function: glutathione transferase activity. Biological process: glutathione metabolic process.	Glutathione S-transferase, C-terminal	2.75422	27.328	20.3015	XP_001978617.1
DS10_00011643	FBgn0022774	CG8782	Oat	Molecular function: ornithine-oxo-acid transaminase activity. Biological process: neurogenesis.	Aminotransferase class-III	2.75398	26.5848	19.9114	XP_002095584.1
DS10_00010815	FBgn0038871	CG3337			Methyltransferase small domain	2.75315	6.22973	8.06694	XP_002102613.1
DS10_00006706	FBgn0028563	CG8714	sut1	Molecular function: glucose transmembrane transporter activity. Biological process: transmembrane transport.	Major facilitator, sugar transporter-like	2.7517	4.22622	6.42819	XP_011196828.1
DS10_00012992	FBgn0038868	CG5862			DDRGK domain containing protein	2.75134	33.4851	22.8878	NP_650954.1
DS10_00004786	FBgn0031005	CG7890	Hs3st-B	Molecular function: [heparan sulfate]-glucosamine 3-sulfotransferase 1 activity. Biological process: single-organism developmental process; post-embryonic organ morphogenesis; cellular component organization or biogenesis; biological regulation; appendage development; sensory organ development; cellular process; organelle organization; instar larval or pupal morphogenesis; system development.	Heparan sulfate sulfotransferase	2.75088	0.919338	0.207155	XP_002101048.1
DS10_00003192	FBgn0034113	CG8060			Ankyrin repeat	2.74763	2.17905	3.67948	XP_001975369.1
DS10_00002105	FBgn0003175	CG4444	px	Molecular function is unknown. Biological process: inter-male aggressive behavior; imaginal disc-derived wing vein morphogenesis.		2.74687	11.2554	11.2851	NP_001261135.1
DS10_00012454	FBgn0038268	CG3631			FAM20	2.74664	2.09298	3.48364	XP_002103402.1
DS10_00007522	FBgn0035449	CG14971			Sugar phosphate transporter domain	2.74642	19.6321	16.3553	NP_647817.2
DS10_00012287	FBgn0036801	CG6896	MYPT-75D	Molecular function: protein phosphatase 1 binding; myosin phosphatase regulator activity. Biological process: imaginal disc-derived wing morphogenesis.	Ankyrin repeat	2.74614	19.3985	16.1921	NP_001262017.1
DS10_00005264	FBgn0263968	CG32743	nonC	Molecular function: protein kinase activity. Biological process: neuromuscular synaptic transmission; nuclear-transcribed mRNA catabolic process, nonsense-mediated decay; synaptic vesicle transport; synapse organization.	Armadillo-type fold	2.74468	5.19665	7.29438	XP_001978490.1
DS10_00012473	FBgn0039075	CG4393			Ankyrin repeat	2.73884	1.35303	1.35497	XP_001982146.1
DS10_00009696	FBgn0038627	CG7694		Molecular function: zinc ion binding. Biological process is unknown.	Zinc finger, RING/FYVE/PHD-type	2.73582	4.2633	6.4668	NP_650729.1
DS10_00003863	FBgn0052036	CG32036		Molecular function: chitin binding. Biological process: chitin metabolic process.	Chitin binding domain	2.73512	1.10126	0.628839	XP_002084275.1
DS10_00004436	FBgn0000109	CG18315	Aprt	Molecular function: adenine phosphoribosyltransferase activity. Biological process: purine ribonucleoside salvage.	Adenine phosphoribosyl transferase	2.73499	21.4928	17.2978	XP_002093214.1
DS10_00008074	FBgn0037440	CG1041	CRAT	Molecular function: carnitine O-acetyltransferase activity. Biological process is unknown.	Acyltransferase ChoActase/COT/CPT	2.73391	21.8712	17.5064	NP_001036684.1
DS10_00008808	FBgn0036819	CG6856	dysb	Molecular function: protein binding. Biological process: regulation of synaptic plasticity; negative regulation of dopamine metabolic process; adult locomotory behavior; short-term memory; positive regulation of synaptic transmission, glutamatergic; long-term memory; mating behavior, sex discrimination.	Dysbindin	2.73345	31.4666	22.1454	XP_002042623.1
DS10_00007320	FBgn0086448	CG32578	PIG-Q	Molecular function: phosphatidylinositol N-acetylglucosaminyltransferase activity. Biological process: GPI anchor biosynthetic process.	N-acetylglucosaminyl transferase component	2.73067	1.5657	2.08255	CAC10056.1
DS10_00006186	FBgn0085354	CG34325		Molecular function: zinc ion binding. Biological process is unknown.	Zinc finger, LIM-type	2.73008	18.2062	15.6207	XP_002101409.1
DS10_00003590	FBgn0034246	CG6493	Dcr-2	Molecular function: ATPase activity; siRNA binding. Biological process: biological regulation; gene silencing; cellular component organization or biogenesis; RNA interference; gene expression; response to other organism; negative regulation of cellular biosynthetic process; regulation of gene expression, epigenetic; immune system process; locomotory behavior; nitrogen compound transport.	DEOXYRIBONUCLEASES I	2.72989	12.3112	11.948	XP_002092062.1
DS10_00009039	FBgn0011672	CG3671	Mvl	Molecular function: manganese ion transmembrane transporter activity; iron ion transmembrane transporter activity; copper ion transmembrane transporter activity; symporter activity. Biological process: iron assimilation; multicellular organismal iron ion homeostasis; copper ion transport; divalent metal ion transport; copper ion import; sensory perception of sweet taste; viral entry into host cel…	NRAMP family	2.72952	55.1085	32.1067	NP_996251.2
DS10_00003636	FBgn0035589	CG4618	CHMP2B	Molecular function is unknown. Biological process: protein transport.	Snf7 family	2.72834	11.7408	11.6519	NP_647947.1
DS10_00011868	FBgn0037933	CG14716	Ho	Molecular function: heme oxygenase (decyclizing) activity. Biological process: heme metabolic process.	Haem oxygenase	2.72454	3.1686	5.24713	XP_002097966.1
DS10_00009468	FBgn0243512	CG7850	puc	Molecular function: JUN kinase phosphatase activity; phosphoprotein phosphatase activity. Biological process: single-organism developmental process; biological regulation; cellular component organization or biogenesis; localization; post-embryonic organ morphogenesis; response to stress; ovarian follicle cell development; system development; digestive tract development; actin filament-based proce…	Dual specificity phosphatase, catalytic domain	2.72231	27.1725	20.4228	XP_002096758.1
DS10_00003242	FBgn0034180	CG15609	Ehbp1	Molecular function: calcium ion binding; actin binding. Biological process: positive regulation of Notch signaling pathway; sensory organ precursor cell division.	bMERB domain	2.72173	14.2695	13.1898	XP_002092493.1
DS10_00011182	FBgn0041160	CG7554	comm2		Commissureless	2.72132	5.15241	7.30465	XP_002085006.1
DS10_00000535	FBgn0031520	CG8837		Molecular function: transmembrane transporter activity. Biological process: transmembrane transport.	Major facilitator, sugar transporter-like	2.71912	4.21807	6.46028	XP_002078015.1
DS10_00011128	FBgn0051174	CG31174				2.70856	1.01276	0.430403	NP_732671.1
DS10_00010837	FBgn0039260	CG6369	Smg6	Molecular function: ribonuclease activity. Biological process: neuromuscular synaptic transmission; nuclear-transcribed mRNA catabolic process, nonsense-mediated decay; regulation of RNA stability; synapse organization.	DNA/RNA-binding domain, Est1-type	2.70777	6.39584	8.27544	AAM27499.1
DS10_00008980	FBgn0039131	CG12268		Molecular function: nucleotide binding; fatty-acyl-CoA reductase (alcohol-forming) activity. Biological process is unknown.	Fatty acyl-CoA reductase	2.70746	1.96266	3.26197	XP_002099320.1
DS10_00001662	FBgn0032505	CG16826				2.70671	2534.2	909.43	AAQ09831.1
DS10_00007763						2.706	2.98506	5.02066	NP_001138031.1
DS10_00010135	FBgn0039507	CG3361	mrt	Molecular function is unknown. Biological process: olfactory learning; learning or memory.		2.70427	17.2393	15.1879	XP_002098804.1
DS10_00011706	FBgn0266756	CG44012	btsz	Molecular function: transporter activity. Biological process: morphogenesis of embryonic epithelium; establishment of planar polarity of embryonic epithelium; positive regulation of cell size; apical junction assembly; gastrulation involving germ band extension; actin filament organization; positive regulation of multicellular organism growth.	C2 domain	2.70397	1.81231	2.86089	XP_001979970.1
DS10_00011434	FBgn0036191	CG7334	Sugb	Molecular function is unknown. Biological process: determination of adult lifespan.	Major facilitator superfamily associated domain	2.70297	10.4239	10.853	XP_002084528.1
DS10_00008304	FBgn0037856	CG4674	Leash		Arrestin, C-terminal	2.70264	1.29482	1.24057	NP_650037.2
DS10_00008357	FBgn0000221	CG4934	brn	Molecular function: beta-1,4-mannosylglycolipid beta-1,3-N-acetylglucosaminyltransferase activity; acetylglucosaminyltransferase activity. Biological process: glycosphingolipid biosynthetic process; morphogenesis of follicular epithelium; ovarian follicle cell-cell adhesion; border follicle cell migration; maintenance of polarity of follicular epithelium; germarium-derived egg chamber formation; …	Glycosyl transferase, family 31	2.69972	8.42054	9.69278	XP_001976846.1
DS10_00000123	FBgn0000256	CG3399	capu	Molecular function: microtubule binding. Biological process: chorion-containing eggshell formation; actin filament-based process; actin nucleation; pole plasm assembly; actin filament organization; pole plasm RNA localization.	Formin, FH2 domain	2.69626	12.4569	12.1703	XP_002078091.1
DS10_00004973	FBgn0024360	CG11418	MTPAP		Nucleotidyltransferase superfamily	2.69565	5.21429	7.41401	XP_002099778.1
DS10_00002127	FBgn0040658	CG13516			LITAF domain containing protein	2.6929	3.42093	5.70034	XP_002082657.1
DS10_00011294	FBgn0036505	CG7945		Molecular function: unfolded protein binding. Biological process: protein folding.	BAG family molecular chaperone regulator 2	2.69208	5.83131	7.86779	XP_002084969.1
DS10_00010467	FBgn0031184	CG14615		Molecular function: transferase activity, transferring acyl groups other than amino-acyl groups. Biological process is unknown.	Acyl-CoA N-acyltransferase	2.68911	15.0979	13.8939	XP_001978721.1
DS10_00013124	FBgn0028717	CG17367	Lnk	Molecular function: signal transducer activity. Biological process: positive regulation of insulin receptor signaling pathway; positive regulation of insulin-like growth factor receptor signaling pathway; female mating behavior; regulation of growth.	Phenylalanine zipper	2.68233	15.0684	13.9096	XP_002041310.1
DS10_00012406	FBgn0038938	CG7084		Molecular function: secondary active organic cation transmembrane transporter activity. Biological process: neurogenesis.		2.68113	4.48691	6.83427	XP_002098253.1
DS10_00009040	FBgn0025865	CG3637	Cortactin	Molecular function: proline-rich region binding. Biological process: regulation of cell shape; positive regulation of receptor-mediated endocytosis; border follicle cell migration; female germline ring canal formation.	Cortactin, SH3 domain	2.67615	61.7126	35.6133	XP_002044279.1
DS10_00004335	FBgn0036999	CG5976	isoQC	Molecular function: glutaminyl-peptide cyclotransferase activity. Biological process: peptidyl-pyroglutamic acid biosynthetic process, using glutaminyl-peptide cyclotransferase.	M28 Zn-Peptidase Glutaminyl Cyclase	2.67597	10.6286	11.1437	XP_002085666.1
DS10_00006612	FBgn0053182	CG33182	Kdm4B	Molecular function: histone demethylase activity (H3-K36 specific); histone demethylase activity (H3-K9 specific). Biological process: histone H3-K36 demethylation; histone H3-K9 demethylation.	JmjC domain	2.67582	6.26315	8.24027	NP_001260942.1
DS10_00011289	FBgn0087035	CG7439	AGO2	Molecular function: protein binding; endoribonuclease activity; siRNA binding. Biological process: biological regulation; single-organism developmental process; gene silencing; cellular component organization or biogenesis; programmed cell death; localization; RNA interference; immune system process; gland morphogenesis; nitrogen compound transport.	Argonaute, linker 1 domain	2.67535	35.8054	24.543	XP_001973098.1
DS10_00004629	FBgn0035113	CG17142	pyx	Molecular function: cation channel activity. Biological process: response to heat; cation transport; negative gravitaxis.	Ankyrin repeat	2.67442	1.99968	3.40119	XP_001970990.1
DS10_00008654	FBgn0040251	CG6658	Ugt302K1	Molecular function: glucuronosyltransferase activity. Biological process: metabolic process.	UDP-glucuronosyl/UDP-glucosyltransferase	2.67411	1.42643	1.75838	XP_002097164.1
DS10_00001113	FBgn0011274	CG6794	Dif	Molecular function: sequence-specific DNA binding transcription factor activity; protein binding; sequence-specific DNA binding; RNA polymerase II core promoter proximal region sequence-specific DNA binding transcription factor activity involved in positive regulation of transcription; DNA binding. Biological process: biological regulation; response to stress; single-organism developmental proces…	Dorsal-related immunity factor Dif	2.67254	2.62946	4.56747	NP_001162998.1
DS10_00004597	FBgn0035140	CG17180	BORCS6		BLOC-1-related complex subunit 6	2.67024	4.40792	6.793	NP_612037.1
DS10_00009008	FBgn0030964	CG7103	Pvf1	Molecular function: heparin binding; receptor binding. Biological process: anterior Malpighian tubule development; Malpighian tubule morphogenesis; border follicle cell migration; cell projection assembly; hemocyte migration; salivary gland morphogenesis.	Cystine-knot cytokine	2.66868	6.74294	8.61379	XP_002101670.1
DS10_00011880	FBgn0261995	CG42813		Molecular function: hydrolase activity, acting on acid anhydrides, in phosphorus-containing anhydrides; metal ion binding. Biological process is unknown.	Nucleoside diphosphate pyrophosphatase	2.66466	36.9534	25.0479	XP_001981575.1
DS10_00004130	FBgn0260941	CG42318	app	Molecular function: protein-cysteine S-palmitoleyltransferase activity. Biological process: establishment of body hair or bristle planar orientation; establishment of imaginal disc-derived wing hair orientation; pattern specification process; imaginal disc-derived leg morphogenesis.	Palmitoyltransferase, DHHC domain	2.6642	6.89932	8.76184	XP_001972517.1
DS10_00004575	FBgn0000575	CG1007	emc	Molecular function: protein binding transcription factor activity; protein heterodimerization activity. Biological process: single-organism developmental process; sensory organ development; post-embryonic organ morphogenesis; neuron differentiation; response to stimulus; biological regulation; cell fate commitment; embryonic development via the syncytial blastoderm; system development; compound e…	DNA-binding protein inhibitor	2.66343	22.1967	18.1937	XP_002083140.1
DS10_00013277	FBgn0033000	CG14464			ARF7 effector protein, C-terminal	2.65739	35.8212	24.6817	AAM50259.1
DS10_00000974	FBgn0263773	CG43690	fok			2.65594	181.587	78.0748	XP_001974183.1
DS10_00004392	FBgn0266696	CG45186	Svil		ADF-H/Gelsolin-like domain superfamily	2.65591	2.47181	4.3852	XP_002094218.1
DS10_00003033	FBgn0259742	CG42360			Ribonuclease Zc3h12a-like, NYN domain	2.65368	10.9325	11.4351	XP_002092863.1
DS10_00004195	FBgn0035703	CG8270	Bulli		Regulator of MON1-CCZ1 complex	2.64838	5.00479	7.3202	ACN22206.1
DS10_00005015	FBgn0031320	CG5126		Molecular function: transferase activity, transferring phosphorus-containing groups. Biological process is unknown.	CHK kinase-like	2.64576	9.27584	10.3559	XP_002099936.1
DS10_00000722	FBgn0031313	CG5080				2.64467	41.5929	27.2306	XP_002077720.1
DS10_00002641	FBgn0040765	CG33473	luna	Molecular function: sequence-specific DNA binding. Biological process: regulation of transcription, DNA-dependent.	SP1/KLF TRANSCRIPTION FACTORS	2.64318	1.28048	1.29481	NP_995811.1
DS10_00011514	FBgn0038079	CG14394	NijC	Molecular function is unknown. Biological process: tissue regeneration; cell adhesion.	Ninjurin	2.63811	1.08475	0.694549	XP_001953660.1
DS10_00007535	FBgn0052264	CG32264			RPEL repeat	2.63441	9.79548	10.6864	XP_002083515.1
DS10_00007367	FBgn0039836	CG1750		Molecular function: methionyl-tRNA formyltransferase activity. Biological process: biosynthetic process; conversion of methionyl-tRNA to N-formyl-methionyl-tRNA.	Formyl transferase, C-terminal	2.63418	2.04567	3.57257	XP_002099490.1
DS10_00005583	FBgn0033087	CG3194	Hsepi	Molecular function: racemase and epimerase activity, acting on carbohydrates and derivatives. Biological process: glycosaminoglycan biosynthetic process	D-glucuronyl C5-epimerase	2.6283	5.34784	7.61782	NP_610249.2
DS10_00001352	FBgn0016919	CG12548	nompB	Molecular function is unknown. Biological process: sensory perception of sound; nonmotile primary cilium assembly.	Tetratricopeptide-like helical domain superfamily	2.62755	0.809037	0.094728	XP_001962473.1
DS10_00005688	FBgn0033194	CG2093	Vps13	Molecular function is unknown. Biological process: protein targeting to vacuole.	Vacuolar protein sorting-associated protein 13	2.62699	14.3242	13.6383	NP_610299.2
DS10_00003778	FBgn0035929	CG13311		Molecular function: structural molecule activity. Biological process is unknown.		2.62412	1.8598	3.13944	XP_002029781.1
DS10_00004463	FBgn0027594	CG2086	drpr	Molecular function: protein binding. Biological process: phagocytosis; apoptotic cell clearance; neuron remodeling; cell competition in a multicellular organism; wing disc dorsal/ventral pattern formation; salivary gland cell autophagic cell death; larval locomotory behavior.	EGF-like, conserved site	2.62393	23.5974	19.2433	NP_728660.2
DS10_00000384	FBgn0032017	CG7810			Ccdc97-like	2.62168	2.0817	3.668	XP_002088777.1
DS10_00010072	FBgn0041630	CG1318	Hexo1	Molecular function: beta-N-acetylglucosaminidase activity. Biological process: carbohydrate metabolic process.	Beta-hexosaminidase	2.62155	17.1679	15.5584	XP_002093685.1
DS10_00013120	FBgn0260965	CG42588		Molecular function is unknown. Biological process: neurogenesis.	WD40/YVTN repeat-like-containing domain superfamily	2.61762	1.54502	2.25811	NP_648604.2
DS10_00012044	FBgn0016650	CG7665	Lgr1	Molecular function: G-protein coupled receptor activity; protein-hormone receptor activity; neuropeptide receptor activity. Biological process: G-protein coupled receptor signaling pathway.	Glycoprotein hormone receptor family	2.61396	1.40462	1.80802	XP_002096108.1
DS10_00002081	FBgn0013272	CG5820	Gp150	Molecular function is unknown. Biological process: inter-male aggressive behavior; transmembrane receptor protein tyrosine phosphatase signaling pathway; compound eye development.	Leucine-rich repeat	2.6034	313.868	114.904	XP_002039890.1
DS10_00002952	FBgn0015277	CG5373	Pi3K59F	Molecular function: 1-phosphatidylinositol-3-kinase activity. Biological process: dsRNA transport; endocytosis; phosphatidylinositol phosphorylation; cellular response to starvation; autophagic vacuole assembly; regulation of autophagy.	Armadillo-type fold	2.60225	7.63174	9.33756	XP_001976430.1
DS10_00009255	FBgn0039156	CG6178		Molecular function: long-chain fatty acid-CoA ligase activity; fatty-acyl-CoA synthase activity. Biological process: acyl-CoA metabolic process; long-chain fatty acid metabolic process; fatty-acyl-CoA biosynthetic process.	AMP-binding, conserved site	2.60215	117.659	57.3289	XP_002099283.1
DS10_00009758	FBgn0015570	CG2505	α-Est2	Molecular function: carboxylesterase activity. Biological process is unknown.	Alpha/Beta hydrolase fold	2.59904	2.28855	4.17843	XP_001979200.1
DS10_00009406	FBgn0037747	CG8481	Naa80	Molecular function: serine-type endopeptidase activity. Biological process is unknown.	Acyl-CoA N-acyltransferase	2.59794	6.28122	8.44586	XP_002070268.1
DS10_00003397	FBgn0033453	CG1667	Sting		Stimulator of interferon genes protein	2.59591	25.5671	20.3832	XP_001969143.1
DS10_00013245	FBgn0038195	CG3061			Chaperone J-domain superfamily	2.59447	37.5117	25.8599	XP_001955483.1
DS10_00008802	FBgn0038366	CG4576		Molecular function: transferase activity, transferring acyl groups other than amino-acyl groups. Biological process is unknown.	Acyltransferase 3	2.59372	1.10946	0.869529	NP_650495.1
DS10_00007895	FBgn0035401	CG1291	Alg2	Molecular function: glycolipid mannosyltransferase activity. Biological process: biosynthetic process.	Glycosyl transferase, family 1	2.59297	8.77649	10.2202	XP_002094143.1
DS10_00004355	FBgn0035383	CG2107	CPT2	Molecular function: carnitine O-palmitoyltransferase activity. Biological process is unknown.	Acyltransferase ChoActase/COT/CPT	2.58938	35.1068	24.7859	NP_647756.1
DS10_00008595	FBgn0027570	CG9761	Nep2	Molecular function: endopeptidase activity; metalloendopeptidase activity. Biological process: proteolysis.	Metallopeptidase, catalytic domain superfamily	2.58875	5.6119	7.91178	XP_002038328.1
DS10_00005654	FBgn0041243	CG1712	Gr43a	Molecular function: taste receptor activity. Biological process: sensory perception of taste	7TM chemoreceptor	2.58848	53.3886	33.2463	NP_001036531.1
DS10_00010090	FBgn0036643	CG4109	Syx8	Molecular function: SNAP receptor activity. Biological process: neurogenesis.	Syntaxin-8, SNARE domain	2.58593	44.9639	29.2962	XP_002095115.1
DS10_00010254	FBgn0085405	CG34376			BTB/POZ domain	2.58542	8.1615	9.83419	XP_002098291.1
DS10_00012910	FBgn0022774	CG8782	Oat	Molecular function: ornithine-oxo-acid transaminase activity. Biological process: neurogenesis.	Aminotransferase class-III	2.5848	19.4296	17.0297	XP_002095584.1
DS10_00000047	FBgn0015924	CG4280	crq	Molecular function: scavenger receptor activity. Biological process: immune response-regulating cell surface receptor signaling pathway involved in phagocytosis; apoptotic process; phagocytosis; autophagic cell death; salivary gland cell autophagic cell death.	CD36 family	2.58256	132.339	62.748	XP_002077642.1
DS10_00008778	FBgn0022787	CG4261	Hel89B	Molecular function: ATP-dependent DNA helicase activity. Biological process: innate immune response; Toll signaling pathway; defense response to bacterium; positive regulation of antibacterial peptide biosynthetic process; antimicrobial humoral response.	Armadillo-like helical	2.58201	6.43153	8.59393	XP_002030988.1
DS10_00007894	FBgn0035401	CG1291	Alg2	Molecular function: glycolipid mannosyltransferase activity. Biological process: biosynthetic process.	Glycosyl transferase, family 1	2.57943	10.5736	11.4907	XP_002094143.1
DS10_00011416	FBgn0037609	CG9773			UNC-50	2.5787	8.5705	10.152	XP_001954246.1
DS10_00002075	FBgn0034716	CG3380	Oatp58D	Molecular function: sodium-independent organic anion transmembrane transporter activity; organic anion transmembrane transporter activity. Biological process: response to methotrexate.	Kazal domain	2.57742	4.65763	7.20828	ACS34700.1
DS10_00012105	FBgn0015576	CG1121	α-Est8	Molecular function: carboxylesterase activity. Biological process is unknown.	Alpha/Beta hydrolase fold	2.57329	80.9943	44.5423	XP_011193262.1
DS10_00006422	FBgn0030431	CG4407		Molecular function: FMN adenylyltransferase activity. Biological process: metabolic process.	Phosphoadenosine phosphosulphate reductase	2.57236	18.8648	16.7805	XP_002100398.1
DS10_00002741	FBgn0034577	CG10540	cpa	Molecular function: actin binding. Biological process: germarium-derived oocyte fate determination; wing disc development; regulation of lamellipodium assembly; actin cytoskeleton organization; negative regulation of actin filament polymerization; cell morphogenesis; actin filament organization; negative regulation of filopodium assembly; phagocytosis, engulfment.	F-actin capping protein, alpha subunit, conserved site	2.57234	25.9281	20.7509	NP_611542.2
DS10_00006932	FBgn0085377	CG34348		Molecular function: transferase activity, transferring acyl groups. Biological process: metabolic process.	Phospholipid/glycerol acyltransferase	2.5705	27.1762	21.4097	XP_002100882.1
DS10_00000831	FBgn0032871	CG2611			Protein of unknown function DUF872, transmembrane	2.56933	26.45	20.9686	XP_002080054.1
DS10_00011564	FBgn0036842	CG3797	Ugt316A1	Molecular function: glucuronosyltransferase activity. Biological process: metabolic process.	UDP-glucuronosyl/UDP-glucosyltransferase	2.56655	4.77323	7.3025	XP_002042651.1
DS10_00006618	FBgn0086532	CG4016	Spt-I	Molecular function: serine C-palmitoyltransferase activity. Biological process: biosynthetic process.	Aminotransferase, class I/classII	2.56623	35.2092	25.0514	XP_001975811.1
DS10_00008990	FBgn0030946	CG6659			C-mannosyltransferase Dpy-19	2.56585	10.8817	11.703	XP_002101644.1
DS10_00011309	FBgn0262146	CG42872	MtnE	Molecular function: metal ion binding. Biological process: response to zinc ion; response to copper ion; response to mercury ion; response to silver ion; detoxification of cadmium ion.	Metallothionein, family 5, Diptera	2.56526	1874.69	676.67	NP_001189254.1
DS10_00000052	FBgn0043364	CG4427	cbt	Molecular function: sequence-specific DNA binding. Biological process: wing disc morphogenesis; dorsal closure; positive regulation of decapentaplegic signaling pathway; sensory organ development; wing disc dorsal/ventral pattern formation; autophagic cell death; salivary gland cell autophagic cell death.	Zinc finger C2H2 superfamily	2.55883	33.1052	24.0812	XP_002087436.1
DS10_00008737	FBgn0020018	CG5796	Ppox	Molecular function: oxygen-dependent protoporphyrinogen oxidase activity. Biological process: heme biosynthetic process.	Amine oxidase	2.55842	5.13214	7.60836	XP_001981954.1
DS10_00011800	FBgn0036964	CG6480	FRG1		Actin-crosslinking	2.55771	1.49685	2.26995	XP_001973459.1
DS10_00011884	FBgn0085322	CG34293			Small subunit of serine palmitoyltransferase-like	2.55751	6.81159	8.9562	XP_001981579.1
DS10_00000537	FBgn0031518	CG3277		Molecular function: protein tyrosine kinase activity. Biological process: protein phosphorylation.	Protein kinase, ATP binding site	2.55438	24.9167	20.3008	XP_002078009.1
DS10_00007813	FBgn0027554	CG8042			Thioredoxin-like superfamily	2.55388	31.4948	23.5677	XP_002094104.1
DS10_00001429	FBgn0031877	CG10399	Hmgcl	Molecular function: hydroxymethylglutaryl-CoA lyase activity. Biological process: leucine metabolic process.	Aldolase-type TIM barrel	2.55341	4.26425	6.86775	XP_002088097.1
DS10_00005843	FBgn0034141	CG8311		Molecular function: dolichol kinase activity. Biological process: dolichyl monophosphate biosynthetic process.	Dolichol kinase	2.55301	46.0976	30.165	XP_001975333.1
DS10_00001023	FBgn0032798	CG10132			NACHT nucleoside triphosphatase	2.55095	1.76198	3.05892	XP_001974241.1
DS10_00003678	FBgn0036372	CG10083	Abp1	Molecular function: actin binding. Biological process is unknown.	Actin-depolymerising factor homology domain	2.55068	10.8775	11.7633	XP_001972664.1
DS10_00004370	FBgn0259200	CG42304			DNTTIP1, dimerisation domain	2.54877	1.69701	2.89879	NP_728769.2
DS10_00004749	FBgn0031048	CG12237		Molecular function: phosphatase activity. Biological process: metabolic process.	HAD-like superfamily	2.54616	19.4536	17.2478	XP_002100997.1
DS10_00009655	FBgn0011336	CG7748	Stt3B	Molecular function: oligosaccharyl transferase activity. Biological process: protein glycosylation.	Oligosaccharyl transferase, STT3 subunit	2.54181	36.6598	25.9226	XP_001981879.1
DS10_00002801	FBgn0033504	CG18408	CAP	Molecular function: vinculin binding. Biological process is unknown.	SH3 domain	2.54062	8.3019	10.0668	XP_002089925.1
DS10_00009854	FBgn0015589	CG1451	Apc	Molecular function: beta-catenin binding. Biological process: single-organism developmental process; biological regulation; system development; cellular component organization or biogenesis; localization; regulation of Wnt receptor signaling pathway; cell proliferation; larval chitin-based cuticle development; cellular process; regulation of developmental process; cellular macromolecule localizat…	Adenomatous polyposis coli (APC) family	2.53846	3.8208	6.40903	XP_002098669.1
DS10_00001367	FBgn0003866	CG1374	tsh	Molecular function: RNA polymerase II core promoter proximal region sequence-specific DNA binding transcription factor activity involved in negative regulation of transcription. Biological process: single-organism developmental process; system development; segment specification; biological regulation; regulation of RNA metabolic process; trunk segmentation; post-embryonic organ morphogenesis; sen…	Protein tiptop/teashirt	2.53669	1.09439	0.87714	NP_523615.2
DS10_00004950	FBgn0000077	CG12127	amx	Molecular function is unknown. Biological process: positive regulation of Notch signaling pathway; ectodermal cell fate determination; mesoderm development.	TM2 domain	2.53617	6.35056	8.63109	XP_001977342.1
DS10_00003534	FBgn0010591	CG8946	Sply	Molecular function: sphinganine-1-phosphate aldolase activity. Biological process: sphingolipid catabolic process; lateral inhibition.	Pyridoxal phosphate-dependent decarboxylase	2.53546	91.6322	49.4114	XP_002034231.1
DS10_00009244	FBgn0261113	CG17836	Xrp1	Molecular function: protein dimerization activity. Biological process: olfactory behavior; cellular process; chromosome organization; imaginal disc-derived wing morphogenesis; negative regulation of cell proliferation.		2.53464	1.88384	3.40714	XP_002102894.1
DS10_00001082	FBgn0000318	CG11024	cl	Molecular function: disulfide oxidoreductase activity. Biological process: eye pigment biosynthetic process.	Domain of unknown function DUF953, thioredoxin-like	2.53239	517.678	186.837	XP_001968808.1
DS10_00002425	FBgn0033665	CG13189	Zip48C	Molecular function: metal ion transmembrane transporter activity. Biological process: transmembrane transport; metal ion transport.	Zinc/iron permease	2.53209	21.6324	18.6917	XP_002091156.1
DS10_00012725	FBgn0259685	CG6383	crb	Molecular function: protein kinase C binding. Biological process: cellular component organization or biogenesis; single-organism developmental process; biological regulation; sensory organ development; cell junction organization; compound eye photoreceptor development; establishment or maintenance of bipolar cell polarity; open tracheal system development; digestive tract development; positive re…	Concanavalin A-like lectin/glucanase domain superfamily	2.53017	2.67341	4.92307	NP_524480.2
DS10_00008465	FBgn0032455	CG5792	Pih1D1		PIH1, N-terminal	2.52993	15.9345	15.2581	XP_001969706.1
DS10_00007307	FBgn0030360	CG1806			Sarcospan	2.52893	1.88523	3.42505	NP_572773.1
DS10_00007295	FBgn0030350	CG1844	SelG	Molecular function is unknown. Biological process: determination of adult lifespan; endoplasmic reticulum calcium ion homeostasis; embryo development.	Selenoprotein SelK/SelG	2.5281	72.0999	42.0873	XP_002101358.1
DS10_00011291	FBgn0087035	CG7439	AGO2	Molecular function: protein binding; endoribonuclease activity; siRNA binding. Biological process: biological regulation; single-organism developmental process; gene silencing; cellular component organization or biogenesis; programmed cell death; localization; RNA interference; immune system process; gland morphogenesis; nitrogen compound transport.	Argonaute, linker 1 domain	2.5279	40.8206	27.8277	XP_001973098.1
DS10_00003727	FBgn0035879	CG7112	GAPcenA	Molecular function: Rab GTPase activator activity. Biological process: regulation of Rab GTPase activity.	Kinesin-like	2.52786	8.68174	10.3445	XP_002029711.1
DS10_00011360	FBgn0025790	CG10327	TBPH	Molecular function: mRNA binding. Biological process: negative regulation of synaptic growth at neuromuscular junction; central nervous system development; neuron projection morphogenesis; adult locomotory behavior; neuromuscular junction development.	Nucleotide-binding alpha-beta plait domain superfamily	2.52747	5.82464	8.24318	NP_477399.1
DS10_00007715						2.52629	106.122	54.8255	NP_723346.2
DS10_00004630	FBgn0053229	CG33229				2.52279	19.1456	17.1919	XP_002083110.1
DS10_00003896	FBgn0036039	CG18177	Naa60	Molecular function: peptide alpha-N-acetyltransferase activity. Biological process: mitotic anaphase; chromosome segregation; N-terminal peptidyl-methionine acetylation.	Acyl-CoA N-acyltransferase	2.52248	5.90016	8.32443	NP_996032.1
DS10_00011840	FBgn0013469	CG12296	klu	Molecular function: nucleic acid binding. Biological process: larval feeding behavior; sensory organ precursor cell fate determination; tricarboxylic acid cycle; neuronal stem cell maintenance; positive regulation of neuroblast proliferation; regulation of stem cell division; positive regulation of compound eye retinal cell programmed cell death; neuroblast development; neurogenesis.	Zinc finger C2H2 superfamily	2.52157	1.1254	1.03071	XP_001972321.1
DS10_00008854	FBgn0036210	CG14130			Alpha-ketoglutarate-dependent dioxygenase alkB homologue 7	2.52087	1.41079	2.00429	NP_648511.2
DS10_00001498	FBgn0010453	CG4698	Wnt4	Molecular function: protein binding. Biological process: female gonad development; establishment of imaginal disc-derived wing hair orientation; non-canonical Wnt receptor signaling pathway; retinal ganglion cell axon guidance; cell migration; neural retina development; regulation of hemocyte proliferation; salivary gland morphogenesis; Wnt receptor signaling pathway, planar cell polarity pathway.		2.52066	0.952958	0.55658	XP_002078488.1
DS10_00011932	FBgn0266418	CG45058	wake	Molecular function is unknown. Biological process: signal transduction.	Ankyrin repeat	2.52038	1.1459	1.09739	XP_002098325.1
DS10_00012807	FBgn0001217	CG7756	Hsc70-2	Molecular function: unfolded protein binding. Biological process: protein folding.	ATPase, nucleotide binding domain	2.52004	1.01668	0.701005	XP_002097476.1
DS10_00005268	FBgn0029913	CG3044	Cht11	Molecular function: chitinase activity. Biological process: chitin catabolic process; carbohydrate metabolic process.	Chitinase II	2.5148	16.5681	15.6785	XP_001978494.1
DS10_00001634	FBgn0031990	CG8552		Molecular function: phosphatidylcholine 1-acylhydrolase activity. Biological process is unknown.	DDHD domain	2.51295	17.8231	16.4954	NP_609185.1
DS10_00010925	FBgn0037200	CG11109		Molecular function: rRNA methyltransferase activity. Biological process is unknown.	Bacterial Fmu (Sun)/eukaryotic nucleolar NOL1/Nop2p, conserved site	2.50779	2.49279	4.707	XP_002040964.1
DS10_00012113	FBgn0035293	CG5687		Molecular function: sodium:iodide symporter activity. Biological process: transmembrane transport.	Sodium/glucose symporter superfamily	2.50775	1.76392	3.16972	XP_002016922.1
DS10_00003831	FBgn0052039	CG32039			Small VCP/p97-interacting protein	2.50762	11.3051	12.2334	ACM16719.1
DS10_00009315						2.50679	1.67509	2.91276	NP_001262458.1
DS10_00006803	FBgn0033337	CG8272			F-box domain	2.50633	5.40437	7.94081	XP_001970411.1
DS10_00009235	FBgn0037327	CG2087	PEK	Molecular function: elongation factor-2 kinase activity. Biological process: regulation of G2/M transition of mitotic cell cycle	Protein kinase, ATP binding site	2.50134	11.6063	12.4536	XP_002102216.1
DS10_00011501	FBgn0005671	CG17369	Vha55	Molecular function: proton-transporting ATPase activity, rotational mechanism. Biological process: ATP hydrolysis coupled proton transport; vacuolar acidification.	ATPase, alpha/beta subunit, nucleotide-binding domain, active site	2.49621	531.011	197.54	NP_476908.1
DS10_00000056	FBgn0031261	CG11822	nAChRβ3	Molecular function: acetylcholine-activated cation-selective channel activity. Biological process: ion transport.	Neurotransmitter-gated ion-channel	2.49518	1.69593	3.00825	XP_002087440.1
DS10_00006652	FBgn0261673	CG8776	nemy	Molecular function: carbon-monoxide oxygenase activity. Biological process: locomotory behavior; memory; imaginal disc-derived wing morphogenesis.	Cytochrome b561/Cytochrome b reductase 1-like	2.49481	4.7764	7.44491	XP_001361276.2
DS10_00011126	FBgn0083984	CG34148			Protein of unknown function DUF4528	2.49397	1.73011	3.09795	XP_002098207.1
DS10_00003049	FBgn0050421	CG30421		Molecular function: ubiquitin thiolesterase activity. Biological process: ubiquitin-dependent protein catabolic process.	Papain-like cysteine peptidase superfamily	2.49382	4.3874	7.14447	XP_001976660.1
DS10_00006684	FBgn0033241	CG2915		Molecular function: metallocarboxypeptidase activity. Biological process: proteolysis.	Carboxypeptidase, activation peptide	2.49366	62.1674	38.5757	AAO25051.1
DS10_00009845	FBgn0043841	CG31764	vir-1	Molecular function is unknown. Biological process: defense response to virus.		2.49312	3.2602	5.83047	NP_001033901.1
DS10_00011498	FBgn0005671	CG17369	Vha55	Molecular function: proton-transporting ATPase activity, rotational mechanism. Biological process: ATP hydrolysis coupled proton transport; vacuolar acidification.	ATPase, alpha/beta subunit, nucleotide-binding domain, active site	2.4918	521.605	193.281	NP_476908.1
DS10_00004624	FBgn0025592	CG18374	Gyk	Molecular function: glycerol kinase activity. Biological process: glycerol-3-phosphate biosynthetic process.	ATPase, nucleotide binding domain	2.49139	110.986	57.2659	NP_524655.1
DS10_00001792	FBgn0032234	CG5091	gny	Molecular function: glucosyltransferase activity. Biological process: chitin-based cuticle development.	Dolichyl pyrophosphate Man9GlcNAc2 alpha-1,3-glucosyltransferase	2.49128	10.2889	11.5986	XP_002089100.1
DS10_00009899	FBgn0037949	CG17360	prd1	Molecular function: phospholipid binding. Biological process is unknown.	PH-like domain superfamily	2.49022	7.05921	9.30623	XP_002097947.1
DS10_00003167	FBgn0034067	CG8399			Cytochrome b561/ferric reductase transmembrane	2.48888	22.6003	19.4679	NP_001286472.1
DS10_00013113	FBgn0266668	CG6095	exo84	Molecular function: phospholipid binding. Biological process: neuron projection morphogenesis; actomyosin contractile ring contraction; spermatid development; establishment or maintenance of cell polarity; meiotic spindle stabilization; cytokinesis; cytokinesis after meiosis II; maintenance of epithelial cell apical/basal polarity; cytokinesis after meiosis I.	Cullin repeat-like-containing domain superfamily	2.48796	4.9474	7.60299	XP_002041344.1
DS10_00004599	FBgn0001316	CG17046	klar	Molecular function: protein binding. Biological process: localization; single-organism developmental process; cellular localization; sensory organ development; locomotion; flight; compound eye photoreceptor development; cellular component organization or biogenesis; biological regulation; larval visceral muscle development; open tracheal system development; organic substance transport; membrane o…	KASH domain	2.48785	34.7337	25.3852	NP_001286888.1
DS10_00001775	FBgn0032218	CG5381				2.48744	40.2594	27.9073	XP_002078918.1
DS10_00005475	FBgn0034488	CG11208	Hacl	Molecular function: oxalyl-CoA decarboxylase activity. Biological process is unknown.	DHS-like NAD/FAD-binding domain superfamily	2.48713	155.418	74.4023	XP_002091720.1
DS10_00001348	FBgn0032945	CG8665		Molecular function: formyltetrahydrofolate dehydrogenase activity. Biological process: oxidation-reduction process; one-carbon metabolic process; 10-formyltetrahydrofolate catabolic process; biosynthetic process	10-formyltetrahydrofolate dehydrogenase	2.48704	15.5419	15.2525	XP_002021721.1
DS10_00007711				short		2.48669	23.3531	19.9263
DS10_00006176	FBgn0031975	CG7356	Tg	Molecular function: protein-glutamine gamma-glutamyltransferase activity. Biological process: hemolymph coagulation; innate immune response.	Immunoglobulin E-set	2.48668	2.26608	4.38373	NP_723332.1
DS10_00006278	FBgn0030343	CG1886	ATP7	Molecular function: copper ion transmembrane transporter activity. Biological process: cellular copper ion homeostasis; copper ion transport; larval development; developmental pigmentation; adult chitin-containing cuticle pigmentation.	HAD-like superfamily	2.48547	6.84725	9.18551	NP_572756.3
DS10_00003718	FBgn0035868	CG7194		Molecular function is unknown. Biological process: gonad development.	Mab-21 domain	2.48472	1.71446	3.09254	NP_648203.1
DS10_00001557	FBgn0052982	CG32982		Molecular function: phospholipid binding. Biological process is unknown.	PH-like domain superfamily	2.48399	5.83824	8.39218	NP_001260277.1
DS10_00005077						2.47997	0.844274	0.356595	XP_005818212.1
DS10_00004773	FBgn0031022	CG12204				2.4788	2.46623	4.72528	XP_001977775.1
DS10_00010743	FBgn0038337	CG6125		Molecular function: high affinity sulfate transmembrane transporter activity. Biological process: sulfate transport.	SLC26A/SulP transporter	2.47755	2.01685	3.79441	XP_002076627.1
DS10_00007911	FBgn0040308	CG1274	Jafrac2	Molecular function: thioredoxin peroxidase activity. Biological process: induction of apoptosis; response to DNA damage stimulus; hydrogen peroxide catabolic process.	Alkyl hydroperoxide reductase subunit C/ Thiol specific antioxidant	2.4729	127.064	63.2135	XP_002094156.1
DS10_00011365	FBgn0260861	CG9298	Trs23	Molecular function is unknown. Biological process: vesicle-mediated transport.	Longin-like domain superfamily	2.47097	29.4185	23.3018	XP_002088849.1
DS10_00002046	FBgn0026378	CG8432	Rep	Molecular function: Rab GTPase binding; Rab geranylgeranyltransferase activity. Biological process: neurotransmitter secretion; vesicle-mediated transport.	FAD/NAD(P)-binding domain superfamily	2.47092	6.83827	9.21217	XP_002091772.1
DS10_00012699	FBgn0038846	CG5697			Solute carrier family 3 member 2, N-terminal domain	2.46965	1.67604	2.99814	XP_001979357.1
DS10_00005255	FBgn0004860	CG3895	ph-d	Molecular function: chaperone binding; core promoter binding; chromatin binding. Biological process: syncytial blastoderm mitotic cell cycle; negative regulation of transcription, DNA-dependent.	Sterile alpha motif/pointed domain superfamily	2.46789	1.55324	2.60114	NP_001096865.1
DS10_00007410	FBgn0039875	CG1937	sip3	Molecular function: protein binding. Biological process: endoplasmic reticulum unfolded protein response.	E3 ubiquitin-protein ligase synoviolin/Hrd1	2.46734	21.8868	19.2351	XP_002105657.1
DS10_00010704	FBgn0260388	CG42514		Molecular function: adenylate cyclase activity. Biological process: transmembrane transport.	Major facilitator superfamily	2.46704	11.4005	12.4673	XP_002095127.1
DS10_00007505	FBgn0263400	CG43446			Zinc finger, FYVE/PHD-type	2.46515	0.98944	0.715498	NP_001247216.1
DS10_00012878	FBgn0051373	CG31373		Molecular function: peptide deformylase activity. Biological process is unknown.	Peptide deformylase	2.46419	22.7178	19.7075	XP_002031726.1
DS10_00009707	FBgn0028670	CG18617	Vha100-2	Molecular function: proton-transporting ATPase activity, rotational mechanism. Biological process: ATP hydrolysis coupled proton transport.	ATPase, V0 complex, subunit 116kDa, eukaryotic	2.46398	129.078	64.5441	XP_002096192.1
DS10_00011158	FBgn0036566	CG5284	ClC-c	Molecular function: chloride channel activity. Biological process: transmembrane transport; chloride transport.	CBS domain	2.46385	14.5849	14.6534	ACX36518.1
DS10_00006915	FBgn0261277	CG1397	rtv	Molecular function is unknown. Biological process: regulation of tube diameter, open tracheal system; chitin biosynthetic process; regulation of tube architecture, open tracheal system; open tracheal system development; chitin-based embryonic cuticle biosynthetic process.	Protein quiver	2.46308	1.20354	1.37708	XP_002100900.1
DS10_00003103	FBgn0028743	CG5036	Dhit	Molecular function: GTPase activator activity. Biological process: regulation of G-protein coupled receptor protein signaling pathway.	RGS, subdomain 1/3	2.46211	2.65968	5.05072	XP_002034355.1
DS10_00010087						2.46186	18.4172	17.0956	XP_002085163.1
DS10_00008383	FBgn0030506	CG12176	Lig4	Molecular function: protein binding. Biological process: telomere maintenance; response to ionizing radiation; double-strand break repair via nonhomologous end joining.	BRCT domain	2.46104	3.33337	5.98385	XP_001978248.1
DS10_00007249	FBgn0035772	CG8582	Sh3beta		SH3-binding, glutamic acid-rich protein	2.46008	14.6319	14.7312	XP_001971459.1
DS10_00009222	FBgn0010051	CG1063	Itp-r83A	Molecular function: inositol 1,4,5-trisphosphate-sensitive calcium-release channel activity. Biological process: larval feeding behavior; cellular calcium ion homeostasis; stabilization of membrane potential; response to oxidative stress; nuclear division; flight behavior; molting cycle, chitin-based cuticle; mushroom body development; release of sequestered calcium ion into cytosol; sensory perc…	Inositol 1,4,5-trisphosphate/ryanodine receptor	2.45874	3.09665	5.71695	XP_002102228.1
DS10_00001967	FBgn0032381	CG14934	Mal-B1	Molecular function: alpha-glucosidase activity. Biological process: carbohydrate metabolic process.	Glycoside hydrolase superfamily	2.45634	363.993	141.584	XP_002041985.1
DS10_00013237	FBgn0000057	CG5124	adp	Molecular function is unknown. Biological process: lipid metabolic process; response to desiccation; regulation of lipid storage; negative regulation of sequestering of triglyceride.	Tetratricopeptide-like helical domain superfamily	2.45504	20.0143	18.2338	XP_002091972.1
DS10_00001170	FBgn0000636	CG5803	Fas3	Molecular function is unknown. Biological process: olfactory learning; synaptic target recognition; axon guidance; learning or memory; imaginal disc-derived wing morphogenesis.	CD80-like, immunoglobulin C2-set	2.4539	1.15201	1.23764	XP_001974387.1
DS10_00012753	FBgn0039674	CG1907		Molecular function: oxoglutarate:malate antiporter activity; transmembrane transporter activity. Biological process: mitochondrial transport; malate transport; alpha-ketoglutarate transport.	Mitochondrial carrier domain superfamily	2.45357	24.9958	21.011	XP_002098575.1
DS10_00007336	FBgn0052576	CG32576		Molecular function is unknown. Biological process: vesicle-mediated transport.	Vesicle transport protein, Got1/SFT2-like	2.45269	28.4508	23.0462	XP_001977969.1
DS10_00001058	FBgn0023388	CG1099	Dap160	Molecular function is unknown. Biological process: vesicle-mediated transport.	EF-Hand 1, calcium-binding site	2.45087	6.77671	9.22001	NP_001246118.1
DS10_00001711	FBgn0028538	CG7578	Sec71	Molecular function: ARF guanyl-nucleotide exchange factor activity. Biological process: ER to Golgi vesicle-mediated transport; intra-Golgi vesicle-mediated transport.	Armadillo-type fold	2.44997	14.2035	14.4435	XP_002088637.1
DS10_00001220	FBgn0032721	CG10602		Molecular function: leukotriene-A4 hydrolase activity. Biological process: proteolysis; translation; leukotriene biosynthetic process.	Aminopeptidase, leukotriene A4 hydrolase-like	2.44917	63.107	39.7616	AAK93169.1
DS10_00004080	FBgn0036448	CG9311	mop	Molecular function: protein tyrosine phosphatase activity. Biological process: positive regulation of epidermal growth factor receptor signaling pathway; antimicrobial peptide production; spindle assembly; regulation of growth; positive regulation of Toll signaling pathway.	ALIX V-shaped domain	2.44763	19.8578	18.2233	XP_001972755.1
DS10_00005189	FBgn0025628	CG4199		Molecular function: 2 iron, 2 sulfur cluster binding; oxidoreductase activity; flavin adenine dinucleotide binding. Biological process: oxidation-reduction process; cell redox homeostasis.	FAD/NAD(P)-binding domain	2.44717	162.62	78.4141	CAA21128.1
DS10_00002786	FBgn0010531	CG17753	Ccs	Molecular function: superoxide dismutase copper chaperone activity. Biological process: determination of adult lifespan; response to oxidative stress; protein stabilization.	Heavy metal-associated domain, HMA	2.44655	11.7325	12.8707	NP_001163108.1
DS10_00002685	FBgn0001276	CG13201	ix	Molecular function: transcription factor binding; RNA polymerase II transcription cofactor activity. Biological process: regulation of transcription from RNA polymerase II promoter; sex determination.	Mediator complex, subunit Med29, metazoa	2.4465	184.392	85.3834	XP_002091221.1
DS10_00000906	FBgn0031548	CG8852			Leucine-rich repeat	2.44393	0.999532	0.769751	NP_608790.2
DS10_00009575	FBgn0038360	CG9590			Protein of unknown function DUF719	2.44222	8.26423	10.3186	XP_002097700.1
DS10_00006775	FBgn0267792	CG8643	rgr	Molecular function: sequence-specific DNA binding transcription factor activity. Biological process: regulation of transcription, DNA-dependent.	MADF domain	2.44172	6.90827	9.33011	XP_002032948.1
DS10_00001112	FBgn0011274	CG6794	Dif	Molecular function: sequence-specific DNA binding transcription factor activity; protein binding; sequence-specific DNA binding; RNA polymerase II core promoter proximal region sequence-specific DNA binding transcription factor activity involved in positive regulation of transcription; DNA binding. Biological process: biological regulation; response to stress; single-organism developmental proces…	Dorsal-related immunity factor Dif	2.43878	3.36409	6.08173	XP_001974449.1
DS10_00009992	FBgn0038304	CG12241		Molecular function: GTPase activator activity. Biological process: regulation of Rab GTPase activity.	Rab-GTPase-TBC domain	2.43866	4.86056	7.63563	XP_002097787.1
DS10_00002252	FBgn0035001	CG4527	slik	Molecular function: protein serine/threonine kinase activity. Biological process: positive regulation of peptidyl-threonine phosphorylation; cell proliferation; protein phosphorylation; cytokinesis; regulation of localization.	Polo kinase kinase	2.43707	21.7257	19.3246	NP_001137752.1
DS10_00012418	FBgn0036745	CG7484		Molecular function: disulfide oxidoreductase activity. Biological process: cell redox homeostasis.	Selenoprotein F/M	2.43256	17.1564	16.5292	XP_002094982.1
DS10_00008425	FBgn0038715	CG7333		Molecular function: secondary active organic cation transmembrane transporter activity. Biological process: transmembrane transport.	Major facilitator, sugar transporter-like	2.43229	4.99497	7.73285	XP_002043299.1
DS10_00008812	FBgn0036821	CG3961		Molecular function: long-chain fatty acid-CoA ligase activity. Biological process: metabolic process.	AMP-binding, conserved site	2.43203	20.4458	18.6128	NP_001262024.1
DS10_00012040	FBgn0051360	CG31360			Domain of unknown function DUF4536	2.43159	3.93584	6.78455	XP_001979730.1
DS10_00004948	FBgn0030114	CG17754		Molecular function is unknown. Biological process: phagocytosis, engulfment.	BTB/Kelch-associated	2.4311	15.2191	15.286	XP_002101723.1
DS10_00007628	FBgn0051522	CG31522		Molecular function is unknown. Biological process: fatty acid biosynthetic process; very long-chain fatty acid metabolic process.	ELO family	2.42883	78.0252	45.6772	XP_001954907.1
DS10_00008852	FBgn0036567	CG13074			Immunoglobulin-like domain	2.42795	0.724722	0.15055	XP_002030683.1
DS10_00005337	FBgn0025836	CG40494	RhoGAP1A	Molecular function: GTPase activator activity. Biological process: Golgi organization; negative regulation of cell size.	Abr/Bcr	2.42611	24.9643	21.1464	XP_001982369.1
DS10_00009617	FBgn0037718	CG8286	P58IPK	Molecular function: protein kinase inhibitor activity. Biological process is unknown.	Chaperone J-domain superfamily	2.42542	43.2563	30.197	XP_002096972.1
DS10_00003054	FBgn0086908	CG12196	egg	Molecular function: protein binding; histone methyltransferase activity (H3-K9 specific); double-stranded methylated DNA binding. Biological process: wing disc development; histone methylation; regulation of gene expression, epigenetic; histone H3-K9 methylation; DNA hypermethylation; instar larval or pupal development; negative regulation of gene expression, epigenetic; oogenesis; female germ-li…	DNA-binding domain superfamily	2.42538	41.0336	28.9646	ABC86335.1
DS10_00011362	FBgn0004914	CG9310	Hnf4	Molecular function: sequence-specific DNA binding transcription factor activity; ligand-activated sequence-specific DNA binding RNA polymerase II transcription factor activity. Biological process: lipid catabolic process; lipid oxidation.	Nuclear hormone receptor	2.42469	4.17737	7.06972	XP_002078696.1
DS10_00001401	FBgn0031824	CG9547		Molecular function: glutaryl-CoA dehydrogenase activity. Biological process: lysine catabolic process; hydroxylysine catabolic process; tryptophan metabolic process.	Acyl-CoA dehydrogenase/oxidase, N-terminal	2.42336	12.2607	13.2995	XP_002088174.1
DS10_00012711	FBgn0259481	CG11711	Mob2	Molecular function: protein binding. Biological process: olfactory learning; learning or memory; long-term memory; cell morphogenesis; rhabdomere development.	MOB kinase activator family	2.42315	23.5522	20.4872	XP_002094429.1
DS10_00010221	FBgn0027570	CG9761	Nep2	Molecular function: endopeptidase activity; metalloendopeptidase activity. Biological process: proteolysis.	Metallopeptidase, catalytic domain superfamily	2.42233	8.33085	10.4195	XP_002038328.1
DS10_00012482	FBgn0037687	CG8132		Molecular function: nitrilase activity. Biological process: nitrogen compound metabolic process.	Carbon-nitrogen hydrolase	2.41389	25.5593	21.6095	XP_002096933.1
DS10_00011583	FBgn0086346	CG12876	ALiX	Molecular function: signal transducer activity. Biological process: positive regulation of JNK cascade; actin filament polymerization.	ALIX V-shaped domain	2.41232	64.4712	40.7855	XP_002105179.1
DS10_00002982	FBgn0041712	CG9889	yellow-d		Major royal jelly protein/protein yellow	2.41186	5.68965	8.41952	XP_002082775.1
DS10_00000532	FBgn0085423	CG34394	GramD1B		GRAM domain	2.41156	7.36587	9.75586	NP_001259996.1
DS10_00008342	FBgn0039328	CG10675	CHKov2	Molecular function: transferase activity, transferring phosphorus-containing groups. Biological process is unknown.	CHK kinase-like	2.40968	1.99521	3.86617	XP_002104915.1
DS10_00006040	FBgn0053080	CG33080		Molecular function: alpha-glucosidase activity. Biological process: carbohydrate metabolic process.	Glycoside hydrolase family 31	2.4076	28.9755	23.5768	XP_002099977.1
DS10_00004743	FBgn0004057	CG12529	Zw	Molecular function: glucose-6-phosphate dehydrogenase activity. Biological process: pentose-phosphate shunt.	Glucose-6-phosphate dehydrogenase	2.40413	282.682	116.024	NP_523411.1
DS10_00011567	FBgn0004369	CG11516	Ptp99A	Molecular function: protein tyrosine phosphatase activity; transmembrane receptor protein tyrosine phosphatase activity. Biological process: motor neuron axon guidance; defasciculation of motor neuron axon.	Fibronectin type III	2.4035	1.93909	3.7887	XP_002098593.1
DS10_00000709	FBgn0031299	CG4629		Molecular function: protein serine/threonine kinase activity. Biological process: regulation of cell shape; cell adhesion.	Protein kinase, ATP binding site	2.40334	2.21673	4.44353	XP_002077705.1
DS10_00013437	FBgn0035470	CG14980		Molecular function: guanyl-nucleotide exchange factor activity. Biological process: autophagy.		2.40203	5.11433	7.96239	XP_002093597.1
DS10_00009120	FBgn0052076	CG32076	Alg10	Molecular function: glucosyltransferase activity. Biological process: protein N-linked glycosylation.	Alpha-2-glucosyltransferase Alg10	2.39809	5.356	8.17858	XP_002030078.1
DS10_00007606	FBgn0037234	CG9795				2.39763	3.0155	5.71747	ADF27171.1
DS10_00004268	FBgn0037057	CG10512		Molecular function: oxidoreductase activity. Biological process: oxidation-reduction process.	Malate/L-lactate dehydrogenase-like	2.39448	38.6062	28.1071	XP_002086287.1
DS10_00000193	FBgn0000317	CG7595	ck	Molecular function: actin-dependent ATPase activity; myosin light chain binding; ATP binding. Biological process: antennal morphogenesis; imaginal disc-derived wing vein morphogenesis; chaeta morphogenesis; antennal development; chitin-based larval cuticle pattern formation; sensory organ development; actin filament-based movement; actin filament organization; imaginal disc-derived wing hair orga…	Band 4.1 domain	2.39369	5.72318	8.48769	XP_002079511.1
DS10_00002974	FBgn0034861	CG9815				2.39163	1.44137	2.40837	NP_001097434.1
DS10_00013273	FBgn0063485	CG3849	Lasp	Molecular function: actin binding. Biological process: positive regulation of pole plasm oskar mRNA localization; sperm individualization; pole cell formation; spermatogenesis.	Nebulin repeat	2.39153	12.922	13.9602	XP_001957639.1
DS10_00012982	FBgn0260960	CG3971	Baldspot	Molecular function is unknown. Biological process: spermatogenesis.	ELO family	2.38964	20.0547	18.7055	XP_002085173.1
DS10_00004943	FBgn0040236	CG12132	c11.1			2.38863	16.3981	16.2798	NP_652606.1
DS10_00001584	FBgn0032120	CG33298		Molecular function: phospholipid-translocating ATPase activity. Biological process: Golgi organization; intracellular protein transport	HAD-like superfamily	2.38763	11.044	12.6696	XP_002088934.1
DS10_00013466	FBgn0000139	CG6677	ash2	Molecular function: zinc ion binding. Biological process: histone H3-K4 methylation; imaginal disc-derived wing vein specification; chromatin-mediated maintenance of transcription; imaginal disc-derived wing morphogenesis.	B30.2/SPRY domain	2.38618	26.0538	22.2545	XP_002104752.1
DS10_00004314	FBgn0037019	CG3947	Pex16	Molecular function is unknown. Biological process: peroxisome organization; spermatocyte division; spermatogenesis.	Peroxisome membrane protein, Pex16	2.38577	32.1541	25.1524	XP_002085698.1
DS10_00003025	FBgn0035027	CG3511		Molecular function: peptidyl-prolyl cis-trans isomerase activity. Biological process: protein folding.	Cyclophilin-like domain superfamily	2.38235	10.1773	11.9279	XP_002082989.1
DS10_00001895	FBgn0261983	CG4713	l(2)gd1	Molecular function: phospholipid binding. Biological process: negative regulation of Notch signaling pathway; wing disc morphogenesis; sensory organ development; compound eye development; regulation of endocytosis; regulation of Notch signaling pathway; imaginal disc-derived wing vein morphogenesis; sensory organ precursor cell division; intracellular protein transport; endosomal transport.	C2 domain	2.37961	20.7663	19.125	XP_002036638.1
DS10_00005618	FBgn0022960	CG3572	vimar	Molecular function: Ral GTPase binding. Biological process: tricarboxylic acid cycle; positive regulation of neuron death; muscle cell homeostasis; rhabdomere development.	Armadillo	2.37344	5.84312	8.64238	XP_001970697.1
DS10_00011065	FBgn0261984	CG4583	Ire1	Molecular function: endoribonuclease activity. Biological process: endoplasmic reticulum unfolded protein response; Golgi organization; mRNA catabolic process; response to endoplasmic reticulum stress; HAC1-type intron splice site recognition and cleavage; regulation of RNA splicing.	KEN domain	2.3714	17.6695	17.1413	XP_001979497.1
DS10_00008157						2.37095	1.03792	1.00886
DS10_00003838	FBgn0001228	CG4456	Hsp67Bb	Molecular function is unknown. Biological process: response to heat.	Rhodanese-like domain	2.37004	1.27768	1.83672	XP_001957990.1
DS10_00004452	FBgn0250789	CG1977	α-Spec	Molecular function: actin binding; microtubule binding. Biological process: negative regulation of microtubule depolymerization; central nervous system development; neuromuscular synaptic transmission; regulation of synapse organization; germarium-derived oocyte fate determination; long-term strengthening of neuromuscular junction; oocyte construction; maintenance of presynaptic active zone struc…	Alpha Spectrin, SH3 domain	2.37003	40.0005	28.8877	XP_002093194.1
DS10_00010952	FBgn0264785	CG44015	Hph	Molecular function: peptidyl-proline 4-dioxygenase activity; iron ion binding. Biological process: response to hypoxia; positive regulation of cell growth; protein localization; trachea morphogenesis; response to DNA damage stimulus; cellular response to hypoxia; terminal branching, open tracheal system.	Oxoglutarate/iron-dependent dioxygenase	2.3694	112.475	60.4691	XP_002102190.1
DS10_00006651						2.3691	1.39364	2.27965	XP_002033599.1
DS10_00000762	FBgn0086698	CG17657	frtz	Molecular function is unknown. Biological process: imaginal disc-derived wing hair site selection; establishment of planar polarity.	WD40/YVTN repeat-like-containing domain superfamily	2.3677	13.7838	14.6417	XP_001968310.1
DS10_00005928	FBgn0003463	CG9224	sog	Molecular function: collagen binding. Biological process: torso signaling pathway; terminal region determination; ring gland development; imaginal disc-derived wing vein morphogenesis; maternal specification of dorsal/ventral axis, oocyte, soma encoded; posterior Malpighian tubule development.	Chordin	2.36736	1.95307	3.86998	NP_476736.1
DS10_00002228	FBgn0000395	CG15671	cv-2	Molecular function is unknown. Biological process: imaginal disc-derived wing vein specification; imaginal disc-derived wing morphogenesis.	Uncharacterised domain, cysteine-rich	2.36726	1.1876	1.55306	XP_002091539.1
DS10_00010917	FBgn0037098	CG7177	Wnk	Molecular function: ATP binding; protein serine/threonine kinase activity. Biological process: axon guidance.	Protein kinase domain	2.36688	6.87997	9.5284	NP_001262172.2
DS10_00011131	FBgn0260940	CG6637	lsn	Molecular function is unknown. Biological process: regulation of apoptotic process; regulation of multivesicular body size involved in endosome transport; cell proliferation; regulation of Notch signaling pathway; bicoid mRNA localization.	ESCRT-2 complex, Snf8	2.36559	5.36768	8.26925	NP_650987.1
DS10_00002838	FBgn0033540	CG11887	Elp2	Molecular function: endopeptidase activator activity. Biological process: proteasome assembly; transcription elongation from RNA polymerase II promoter	Elongator complex protein 2	2.36456	1.61836	3.09319	XP_002090386.1
DS10_00009888	FBgn0026630	CG9655	nes	Molecular function: lysophospholipid acyltransferase activity. Biological process: sperm individualization; germ cell migration; lipid modification; plasma membrane organization.	Membrane bound O-acyl transferase, MBOAT	2.36234	135.281	69.3412	XP_002086338.1
DS10_00001230	FBgn0032729	CG10639	L2HGDH	Molecular function: oxidoreductase activity. Biological process: oxidation-reduction process.	FAD/NAD(P)-binding domain superfamily	2.36205	42.5095	30.596	XP_001974324.1
DS10_00002980	FBgn0034854	CG3493	Golgin245	Molecular function is unknown. Biological process: protein targeting to Golgi.	GRIP domain	2.36166	10.4266	12.226	XP_002092602.1
DS10_00006397	FBgn0250862	CG42237		Molecular function: calcium ion binding; phospholipase A2 activity. Biological process: lipid catabolic process; phospholipid metabolic process.	Phospholipase A2, histidine active site	2.36128	1.01685	0.968887	NP_001285185.1
DS10_00007357	FBgn0039827	CG1544		Molecular function: oxoglutarate dehydrogenase (succinyl-transferring) activity. Biological process: tricarboxylic acid cycle.	2-oxoglutarate dehydrogenase E1 component	2.35851	1.5714	2.93629	XP_002099479.1
DS10_00010914	FBgn0037098	CG7177	Wnk	Molecular function: ATP binding; protein serine/threonine kinase activity. Biological process: axon guidance.	Protein kinase domain	2.35643	9.23729	11.3743	NP_001262172.2
DS10_00003359	FBgn0287478	CG42332	Camta	Molecular function: RNA polymerase II core promoter proximal region sequence-specific DNA binding transcription factor activity involved in positive regulation of transcription; protein homodimerization activity. Biological process: response to light stimulus; positive regulation of transcription from RNA polymerase II promoter; deactivation of rhodopsin mediated signaling.	Ankyrin repeat-containing domain	2.35509	2.18654	4.49588	NP_610491.4
DS10_00010250	FBgn0038966	CG13848	pinta	Molecular function: retinoid binding. Biological process: phototransduction; rhodopsin biosynthetic process.	CRAL/TRIO, N-terminal domain superfamily	2.35493	15.4682	15.8755	XP_002104418.1
DS10_00009901	FBgn0051116	CG31116	ClC-a	Molecular function: chloride channel activity. Biological process: chloride transport.	CBS domain	2.3542	9.39497	11.5287	XP_001980507.1
DS10_00007043						2.35002	4.86653	7.84654	XP_002010534.1
DS10_00000386	FBgn0032015	CG7830	Ostγ	Molecular function is unknown. Biological process: encapsulation of foreign target.	Oligosaccharyl transferase complex, subunit OST3/OST6	2.34823	70.2539	44.2276	AAM52687.1
DS10_00003309	FBgn0033375	CG8078		Molecular function: tRNA binding; ATP binding. Biological process: tRNA thio-modification.	Cytoplasmic tRNA 2-thiolation protein 1	2.34751	3.08248	5.89401	XP_001970365.1
DS10_00004313	FBgn0037020	CG4289	Pex14	Molecular function: transcription corepressor activity. Biological process: peroxisome organization.	Peroxisomal membrane protein 14	2.34601	104.539	57.7508	XP_002095420.1
DS10_00010857	FBgn0036663	CG9674		Molecular function: glutamate synthase (NADPH) activity. Biological process: oxidation-reduction process; glutamate biosynthetic process.	Aldolase-type TIM barrel	2.3432	33.9591	26.3857	NP_648922.1
DS10_00009827	FBgn0261674	CG42709			Leucine-rich repeat	2.34249	26.5349	22.9338	NP_001287051.1
DS10_00005184	FBgn0025632	CG4313		Molecular function: G-protein coupled receptor activity. Biological process: G-protein coupled receptor signaling pathway.	CLASS A GPCR NEUROPEPTIDE AND PROTEIN HORMONE RECEPTORS	2.34214	0.804284	0.428586	XP_002100323.1
DS10_00005918	FBgn0030673	CG15601			MADF domain	2.34152	2.55503	5.13813	XP_002100703.1
DS10_00005575	FBgn0262736	CG3161	Vha16-1	Molecular function: hydrogen ion transmembrane transporter activity. Biological process: dsRNA transport; imaginal disc-derived wing morphogenesis.	F/V-ATP synthase subunit C superfamily	2.3403	2207.33	953.698	NP_476801.1
DS10_00002843						2.33979	3.80066	6.8175
DS10_00007847	FBgn0035440	CG14969			Osteopetrosis-associated transmembrane protein 1 precursor	2.33692	9.04043	11.2738	XP_002093552.1
DS10_00004160	FBgn0035677	CG13293			Protein SCAI	2.33529	0.849548	0.567941	NP_001261463.1
DS10_00005824	FBgn0034419	CG15111			LYSOPHOSPHOLIPASES	2.335	33.1513	26.0756	XP_002034546.1
DS10_00006418	FBgn0030435	CG4645			Protein Yip5/YIPF1/YIPF2	2.33281	53.8306	36.7343	XP_001978330.1
DS10_00013045	FBgn0039969	CG17510	Fis1	Molecular function is unknown. Biological process: mitochondrion organization.	Fis1, C-terminal tetratricopeptide repeat	2.33147	37.6552	28.3711	NP_001137608.1
DS10_00004544						2.33094	1.4299	2.50975	XP_002083179.1
DS10_00009353	FBgn0037467	CG1104	Ufl1		E3 UFM1-protein ligase 1	2.32976	13.1146	14.4022	XP_001979136.1
DS10_00003172						2.32834	0.924739	0.787795	XP_002092293.1
DS10_00004639	FBgn0085292	CG34263			Kazal domain superfamily	2.3268	0.967349	0.905146	NP_001097459.1
DS10_00010074	FBgn0035529	CG1319	Fdx2	Molecular function: electron carrier activity. Biological process is unknown.	2Fe-2S ferredoxin-like superfamily	2.32575	120.791	64.8747	XP_002083621.1
DS10_00012694	FBgn0037730	CG9444		Molecular function: proton-dependent oligopeptide secondary active transmembrane transporter activity. Biological process: oligopeptide transport.	MFS transporter superfamily	2.32504	20.5779	19.3639	XP_001980778.1
DS10_00007338	FBgn0000536	CG3525	eas	Molecular function: ethanolamine kinase activity. Biological process: response to hypoxia; response to mechanical stimulus; phosphatidylethanolamine metabolic process; asymmetric neuroblast division; brain development; mushroom body development; mechanosensory behavior.	Protein kinase-like domain superfamily	2.32445	99.9168	55.9646	P54352.2
DS10_00003593	FBgn0034249	CG6477	RhoGAP54D	Molecular function: Rho GTPase activator activity. Biological process: imaginal disc-derived leg morphogenesis.	Rho GTPase-activating protein domain	2.32376	8.10366	10.57	ABJ17064.1
DS10_00010049	FBgn0035504	CG15003	Teh4	Molecular function: sodium channel regulator activity. Biological process: regulation of sodium ion transport.	Na+ channel auxiliary subunit TipE	2.32336	0.694695	0.210876	XP_002035298.1
DS10_00007991	FBgn0265784	CG6103	CrebB-17A	Molecular function: sequence-specific DNA binding; DNA binding. Biological process: regulation of transcription, DNA-dependent; positive regulation of transcription from RNA polymerase II promoter; long-term memory; neuromuscular junction development; medium-term memory; sleep.	Basic-leucine zipper domain	2.32306	15.0352	15.7432	ACE82592.1
DS10_00010122	FBgn0039620	CG1443	wat	Molecular function: nucleotide binding; fatty-acyl-CoA reductase (alcohol-forming) activity. Biological process is unknown.	Fatty acyl-CoA reductase	2.32058	14.833	15.6402	NP_651652.2
DS10_00012106	FBgn0015575	CG1112	alpha-Est7	Molecular function: carboxylesterase activity. Biological process: response to organophosphorus; determination of adult lifespan; lipid storage	Alpha/Beta hydrolase fold	2.32009	35.2148	27.3314	XP_002096647.1
DS10_00003454	FBgn0034644	CG10082		Molecular function: inositol hexakisphosphate kinase activity. Biological process: protein phosphorylation; phosphatidylinositol metabolic process.	Inositol polyphosphate kinase	2.31727	15.612	16.1775	XP_002091503.1
DS10_00002829						2.31623	1.27504	1.94268	XP_001976203.1
DS10_00000656	FBgn0031633	CG2976	Fnta	Molecular function: protein farnesyltransferase activity. Biological process: protein prenylation.	Protein prenyltransferase, alpha subunit	2.31589	22.3162	20.4956	XP_002087965.1
DS10_00000339	FBgn0039872	CG2196	salt	Molecular function: sodium:iodide symporter activity. Biological process: transmembrane transport.	Sodium/glucose symporter superfamily	2.31564	0.88611	0.700017	NP_001097055.2
DS10_00009496	FBgn0003093	CG1954	Pkc98E	Molecular function: protein kinase C activity; diacylglycerol binding. Biological process: neuron projection morphogenesis; Golgi organization; response to ethanol; negative regulation of cell proliferation; lipid particle organization.	AGC-kinase, C-terminal	2.31533	2.43343	5.02329	NP_001287576.1
DS10_00011083	FBgn0259824	CG6017	Hip14	Molecular function: protein-cysteine S-palmitoleyltransferase activity. Biological process: synaptic transmission; positive regulation of protein secretion; synaptic vesicle exocytosis	Ankyrin repeat	2.31521	6.99372	9.80516	XP_002085038.1
DS10_00012194	FBgn0036812	CG4076	Nufip	Molecular function: mRNA binding. Biological process is unknown.	Nuclear fragile X mental retardation-interacting protein 1, conserved domain	2.3144	2.73495	5.52357	XP_001972811.1
DS10_00001767	FBgn0267365	CG5385	SH0834			2.31435	18.3053	18.003	XP_002089077.1
DS10_00001771	FBgn0267365	CG5385	SH0834			2.31435	18.3053	18.003	XP_002089077.1
DS10_00011414	FBgn0037611	CG11755			Cysteine-rich domain, DPF-motif	2.31293	1.37255	2.31234	XP_002096837.1
DS10_00011478	FBgn0036741	CG7510		Molecular function is unknown. Biological process: transmembrane transport; intracellular signal transduction.	DEP domain	2.3126	15.9154	16.4414	XP_002085292.1
DS10_00013394	FBgn0263289	CG43398	scrib	Molecular function: protein binding. Biological process: single-organism developmental process; biological regulation; cellular component organization or biogenesis; sensory organ development; post-embryonic organ morphogenesis; establishment of planar polarity; cell proliferation; instar larval development; cell junction organization; localization; stem cell differentiation; cell cycle; establis…	Leucine-rich repeat	2.31115	8.91806	11.2975	NP_001014670.2
DS10_00007054	FBgn0263112	CG43369	Mitf	Molecular function: protein dimerization activity. Biological process: regulation of transcription, DNA-dependent; compound eye morphogenesis.	Helix-loop-helix DNA-binding domain superfamily	2.31027	30.8957	25.2424	NP_001245436.1
DS10_00008763	FBgn0285912	CG13646	mah	Molecular function: amino acid transmembrane transporter activity. Biological process: amino acid transmembrane transport.	Amino acid transporter, transmembrane domain	2.30744	1.40874	2.49655	XP_002099143.1
DS10_00004427	FBgn0035298	CG1140	SCOT	Molecular function: 3-oxoacid CoA-transferase activity. Biological process: ketone body catabolic process.	3-oxoacid CoA-transferase	2.30663	46.5011	33.5339	XP_001971233.1
DS10_00010832	FBgn0039265	CG11790			Thioredoxin-like superfamily	2.30647	4.19382	7.34075	XP_002099128.1
DS10_00006853	FBgn0053181	CG33181		Molecular function: cation transmembrane transporter activity. Biological process: cation transport.	SLC41 divalent cation transporters, integral membrane domain	2.30411	45.1025	32.7061	NP_001096908.1
DS10_00005483	FBgn0001123	CG2835	Gαs	Molecular function: GTPase activity. Biological process: chaeta development; synaptic transmission; wing disc development; response to trehalose stimulus; sensory perception of sweet taste; neuromuscular junction development; imaginal disc-derived wing morphogenesis.	G-protein alpha subunit, group S	2.29815	33.748	26.8187	XP_002005871.1
DS10_00008176	FBgn0000163	CG5055	baz	Molecular function: phosphatidylinositol binding; protein binding. Biological process: anatomical structure development; cellular process involved in reproduction; biological regulation; cellular component organization or biogenesis; multicellular organismal reproductive process; cell division; localization; regulation of developmental process; establishment or maintenance of monopolar cell polar…	Par3/HAL, N-terminal	2.29591	8.33125	10.8563	NP_001036283.1
DS10_00006043	FBgn0027564	CG3149		Molecular function: lipid transporter activity. Biological process: lipid transport.	RFT1	2.29556	28.7836	24.4531	XP_001976996.1
DS10_00007458	FBgn0000477	CG7780	DNaseII	Molecular function: deoxyribonuclease II activity. Biological process: nurse cell apoptotic process.	Deoxyribonuclease II	2.29383	5.94198	8.9836	AAL68195.2
DS10_00006821	FBgn0029853	CG3781		Molecular function: omega peptidase activity. Biological process is unknown.	Josephin-1/2	2.29282	4.49453	7.657	NP_572303.4
DS10_00010089	FBgn0052163	CG32163			Acyl-CoA N-acyltransferase	2.29119	9.29159	11.6887	NP_001287083.1
DS10_00004492	FBgn0035233	CG7864	Pex10	Molecular function: zinc ion binding. Biological process: male meiosis cytokinesis; spermatid development; primary spermatocyte growth; spermatocyte division.	Pex, N-terminal	2.29115	29.5068	24.8268	XP_002093141.1
DS10_00003779	FBgn0085456	CG34427		Molecular function: chitin binding. Biological process: chitin metabolic process.	Chitin binding domain	2.29109	1.38762	2.42083	NP_001097553.2
DS10_00010138	FBgn0040609	CG3348		Molecular function: chitin binding. Biological process: chitin metabolic process.	Chitin binding domain	2.28985	178.315	88.7043	XP_002105143.1
DS10_00011505	FBgn0038068	CG11600		Molecular function: triglyceride lipase activity. Biological process: lipid metabolic process.	TRIGLYCERIDE LIPASES	2.2864	0.812566	0.542635	NP_650217.2
DS10_00012303	FBgn0014427	CG11899		Molecular function: O-phospho-L-serine:2-oxoglutarate aminotransferase activity. Biological process: pyridoxine biosynthetic process; L-serine biosynthetic process.	Aminotransferase class-V, pyridoxal-phosphate binding site	2.28545	6.69741	9.6332	XP_002098612.1
DS10_00005086	FBgn0250788	CG5870	beta-Spec	Molecular function: phosphatidylinositol-4,5-bisphosphate binding; microtubule binding; ankyrin binding. Biological process: negative regulation of microtubule depolymerization; neuromuscular synaptic transmission; regulation of synapse organization; long-term strengthening of neuromuscular junction; axon guidance; nervous system development; photoreceptor cell axon guidance; maintenance of presy…	Actinin-type actin-binding domain, conserved site	2.28394	56.8764	39.1411	XP_001977585.1
DS10_00004365	FBgn0035371	CG9977	AhcyL1	Molecular function: adenosylhomocysteinase activity. Biological process: one-carbon metabolic process.	Adenosylhomocysteinase-like	2.28302	44.4724	32.5542	XP_001971312.1
DS10_00003163	FBgn0034070	CG8403	SP2353	Molecular function is unknown. Biological process: muscle cell homeostasis; rhabdomere development	Concanavalin A-like lectin/glucanase domain superfamily	2.28166	1.22922	1.85407	XP_001975428.1
DS10_00009456	FBgn0038115	CG7966		Molecular function: selenium binding. Biological process is unknown.	Selenium-binding protein	2.28091	42.0881	31.1783	NP_650256.2
DS10_00012006	FBgn0038810	CG5434	Srp72	Molecular function: 7S RNA binding. Biological process: dsRNA transport.	Putative TPR-like repeat	2.28004	1.51523	2.97378	XP_001979412.1
DS10_00010142	FBgn0038196	CG9922		Huntingtin-interacting protein K, UBA-like domain		2.27934	1.72172	3.50911	XP_001979873.1
DS10_00005260	FBgn0259228	CG42328	C3G	Molecular function: Ras guanyl-nucleotide exchange factor activity. Biological process: Ras protein signal transduction; somatic muscle development; sarcomere organization; muscle attachment; regulation of Rap GTPase activity.	Ras guanine-nucleotide exchange factor, conserved site	2.27911	14.4084	15.5958	NP_001259291.1
DS10_00009922	FBgn0039528	CG5634	dsd	Molecular function is unknown. Biological process: synaptic target recognition.	CUB domain	2.27614	24.1571	22.006	AAR82792.1
DS10_00006479	FBgn0030369	CG9100	Cyp318a1	Molecular function: electron carrier activity. Biological process: oxidation-reduction process.	Cytochrome P450	2.27586	0.828983	0.612318	XP_001978394.1
DS10_00001476	FBgn0031882	CG9100	Rab30	Molecular function: GTPase activity. Biological process: protein transport; small GTPase mediated signal transduction.	P-loop containing nucleoside triphosphate hydrolase	2.27561	6.99637	9.93193	XP_002088084.1
DS10_00007199	FBgn0023094	CG8727	cyc	Molecular function: RNA polymerase II regulatory region sequence-specific DNA binding; protein heterodimerization activity; DNA binding. Biological process: response to starvation; regulation of circadian sleep/wake cycle, sleep; circadian regulation of gene expression.	Helix-loop-helix DNA-binding domain superfamily	2.27539	13.5286	15.0561	XP_002095562.1
DS10_00006714	FBgn0033266	CG2160	Socs44A	Molecular function is unknown. Biological process: positive regulation of epidermal growth factor receptor signaling pathway; negative regulation of JAK-STAT cascade.	SH2 domain	2.27252	25.6544	23.0336	XP_002080553.1
DS10_00004795	FBgn0030997	CG7990		Frag1/DRAM/Sfk1		2.26956	2.29307	4.88828	NP_573361.1
DS10_00003056	FBgn0035064	CG16912	TyrRS-m	Molecular function: tyrosine-tRNA ligase activity. Biological process: translation.	Aminoacyl-tRNA synthetase, class I, conserved site	2.26914	2.5521	5.32729	XP_002092892.1
DS10_00011361	FBgn0003209	CG12437	raw	Molecular function is unknown. Biological process: single-organism developmental process; biological regulation; digestive tract development; gland morphogenesis; programmed cell death; embryonic development via the syncytial blastoderm; salivary gland morphogenesis; embryo development ending in birth or egg hatching; localization; gonad morphogenesis.	Nucleoside 2-deoxyribosyltransferase-like	2.26839	16.0266	16.7442	NP_001285759.1
DS10_00012644	FBgn0053970	CG33970	osy	Molecular function: ATPase activity, coupled to transmembrane movement of substances; transporter activity. Biological process: transport.	AAA+ ATPase domain	2.26808	8.48955	11.1578	XP_002098923.1
DS10_00012860	FBgn0010772	CG2179	Xe7	Molecular function is unknown. Biological process: axon guidance; lateral inhibition.		2.26798	26.7131	23.6087	XP_001978975.1
DS10_00000404	FBgn0031998	CG8451	SLC5A11	Molecular function: sodium-dependent multivitamin transmembrane transporter activity. Biological process: transmembrane transport.	Sodium/glucose symporter superfamily	2.26595	6.08851	9.1921	XP_002088755.1
DS10_00005169	FBgn0023510	CG17766	Rbcn-3B	Molecular function: GTPase activity. Biological process: regulation of Notch signaling pathway; vacuolar acidification	WD40/YVTN repeat-like-containing domain superfamily	2.25939	13.7893	15.2717	XP_002100337.1
DS10_00013262	FBgn0036545	CG17035	GXIVsPLA2	Molecular function: phospholipase A2 activity. Biological process: lipid catabolic process; phospholipid metabolic process.	Group XII secretory phospholipase A2 precursor	2.2581	8.75472	11.4195	XP_002086433.1
DS10_00004963	FBgn0030100	CG12106			COMM domain	2.2568	5.35377	8.54382	XP_002101058.1
DS10_00002651	FBgn0037084	CG7736	Syx6	Molecular function: SNAP receptor activity. Biological process: synaptic vesicle docking involved in exocytosis.	SNARE	2.25591	14.5009	15.7332	XP_002090329.1
DS10_00000972	FBgn0032845	CG10747		Molecular function: glycosylphosphatidylinositol diacylglycerol-lyase activity; phosphoric diester hydrolase activity. Biological process: glycerophospholipid metabolic process.	Phosphatidylinositol-specific phospholipase C, X domain	2.25549	6.05658	9.1967	XP_002039194.1
DS10_00010515	FBgn0083984	CG34148			Protein of unknown function DUF4528	2.25412	1.40057	2.5754	XP_002098207.1
DS10_00005522	FBgn0019968	CG8183	Khc-73	Molecular function: microtubule motor activity; protein homodimerization activity. Biological process: establishment of spindle orientation; regulation of synapse structure and activity.	CAP Gly-rich domain	2.25374	11.8749	13.9582	XP_002081634.1
DS10_00010433	FBgn0036931	CG14183		Molecular function: ATP binding. Biological process is unknown.	ATPase, AAA-type, core	2.25283	8.1099	10.8368	XP_001973424.1
DS10_00011099	FBgn0015278	CG11621	Pi3K68D	Molecular function: protein binding; phospholipid binding; 1-phosphatidylinositol-4-phosphate 3-kinase activity; 1-phosphatidylinositol-3-kinase activity; Rab GTPase binding. Biological process: phosphatidylinositol phosphorylation; response to DNA damage stimulus; cortical actin cytoskeleton organization; phagocytosis, engulfment.	Armadillo-type fold	2.25275	10.1822	12.5696	XP_002094479.1
DS10_00006224	FBgn0040285	CG9195	Scamp	Molecular function is unknown. Biological process: long-term memory.	SCAMP	2.25251	59.7826	41.0218	NP_573023.2
DS10_00008220	FBgn0030759	CG13014				2.25016	15.4582	16.5268	XP_002042263.1
DS10_00010219						2.24987	22.7932	21.2824	XP_002038324.1
DS10_00004672	FBgn0029789	CG3160	PGAP1	Molecular function: phosphoric ester hydrolase activity; nuclease activity. Biological process: myo-inositol transport.	Alpha/Beta hydrolase fold	2.24864	8.00004	10.7842	XP_002099982.1
DS10_00001183	FBgn0032684	CG10178	Ugt301D1	Molecular function: glucuronosyltransferase activity. Biological process: metabolic process.	UDP-glucuronosyl/UDP-glucosyltransferase	2.24844	12.9089	14.7316	XP_002090577.1
DS10_00005690	FBgn0033195	CG1360				2.24725	1.89574	4.01773	XP_002080456.1
DS10_00010490	FBgn0037313	CG1161			TMEM9	2.24604	23.11	21.467	XP_001978910.1
DS10_00011538	FBgn0002932	CG11988	neur	Molecular function: ubiquitin-protein ligase activity. Biological process: single-organism developmental process; biological regulation; sensory organ development; response to stimulus; system development; regulation of developmental process; regulation of neurogenesis; single-organism behavior; cell fate commitment; post-embryonic organ morphogenesis; locomotory behavior; localization; neuromusc…	B30.2/SPRY domain superfamily	2.24599	7.92991	10.6845	CAA43806.1
DS10_00011062	FBgn0038737	CG11447		Molecular function: rRNA (uridine-2'-O-)-methyltransferase activity. Biological process: RNA methylation	Ribosomal RNA large subunit methyltransferase E	2.24593	1.86929	3.92505	NP_650835.1
DS10_00000570	FBgn0025109	CG18642	Bem46		Alpha/Beta hydrolase fold	2.2443	11.7295	13.8768	XP_002037665.1
DS10_00002603	FBgn0264560	CG8487	garz	Molecular function: ARF guanyl-nucleotide exchange factor activity. Biological process: Golgi organization; regulation of tube diameter, open tracheal system; epithelial cell development; regulation of ARF GTPase activity; protein secretion; cell morphogenesis; salivary gland development; secretion by cell; lumen formation, open tracheal system; phagocytosis, engulfment.	Guanine nucleotide exchange factor, N-terminal	2.24179	8.05515	10.8261	XP_002091088.1
DS10_00007971	FBgn0039955	CG41099		Molecular function: metal ion binding. Biological process is unknown.	Ankyrin repeat	2.23942	15.7073	16.7397	XP_001978772.1
DS10_00003099	FBgn0028741	CG6355	fab1	Molecular function: 1-phosphatidylinositol-3-phosphate 5-kinase activity. Biological process: endosome to lysosome transport; phosphatidylinositol phosphorylation.	Chaperonin Cpn60/TCP-1 family	2.23897	4.62532	7.93211	CAA22949.1
DS10_00011811	FBgn0036812	CG4076	Nufip	Molecular function: mRNA binding. Biological process is unknown.	Nuclear fragile X mental retardation-interacting protein 1, conserved domain	2.23648	3.22443	6.28859	XP_001972811.1
DS10_00010838	FBgn0015240	CG11783	Hr96	Molecular function: RNA polymerase II regulatory region sequence-specific DNA binding. Biological process: response to starvation; triglyceride homeostasis; regulation of glycogen metabolic process; cholesterol homeostasis.	Nuclear hormone receptor, ligand-binding domain	2.23429	16.0783	16.9773	XP_001358476.1
DS10_00013131	FBgn0039165	CG6204			DNA2/NAM7 helicase, helicase domain	2.23291	11.3731	13.6701	XP_002099271.1
DS10_00002621	FBgn0033736	CG13154				2.23144	0.623799	0.141212	XP_002081189.1
DS10_00012202	FBgn0053977	CG33977	Dpm3		Dolichol-phosphate mannosyltransferase subunit 3	2.23053	3.49661	6.71627	XP_002031331.1
DS10_00009031	FBgn0013995	CG5685	Calx	Molecular function: calcium ion binding; calcium:sodium antiporter activity. Biological process: phototransduction.	CalX-like domain superfamily	2.23008	8.95884	11.6901	NP_524423.2
DS10_00011059	FBgn0261984	CG4583	Ire1	Molecular function: endoribonuclease activity. Biological process: endoplasmic reticulum unfolded protein response; Golgi organization; mRNA catabolic process; response to endoplasmic reticulum stress; HAC1-type intron splice site recognition and cleavage; regulation of RNA splicing.	KEN domain	2.22841	12.518	14.5026	NP_001097839.1
DS10_00011359	FBgn0031233	CG11490	Tbc1d15-17	Molecular function: GTPase activator activity. Biological process: regulation of Rab GTPase activity.	Rab-GTPase-TBC domain	2.22615	4.07386	7.42047	XP_001968137.1
DS10_00000977	FBgn0045064	CG13969	bwa	Molecular function: ceramidase activity. Biological process: ceramide catabolic process; brain development.	Alkaline ceramidase	2.22577	13.1473	15.1045	NP_001260616.1
[truncated: 253 more rows]
